# Supplementary material for: Multi-criteria decision support for planning and evaluation of performance of viral marketing campaigns in social networks
Source: PLoS One. 2018 Dec 27;13(12):e0209372. doi: 10.1371/journal.pone.0209372 (PMC6307867; doi:10.1371/journal.pone.0209372)
Supplement: S1 File — (XLSX) [file pone.0209372.s001.xlsx]

## Sheet: syn-vshape-equal
Scenario	Scenario1
Evaluations	Seeding Fraction	Average PP	Measure	Average Last Iteration	Average Coverage
action1	0.01	0.01	0.006	1	1.05
action2	0.01	0.01	0.011	1	1.05
action3	0.01	0.01	0.0085	1	1.05
action4	0.01	0.01	0.009	1	1.05
action5	0.01	0.1	0.006	9.7	16.89
action6	0.01	0.1	0.011	9.7	16.9
action7	0.01	0.1	0.0085	9.7	16.9
action8	0.01	0.1	0.009	9.3	16.6
action9	0.01	0.2	0.006	10.4	58.37
action10	0.01	0.2	0.011	10.4	58.37
action11	0.01	0.2	0.0085	10.4	58.37
action12	0.01	0.2	0.009	10.2	58.37
action13	0.01	0.3	0.006	7.9	81.13
action14	0.01	0.3	0.011	7.8	81.13
action15	0.01	0.3	0.0085	7.8	81.13
action16	0.01	0.3	0.009	8.1	81.13
action17	0.01	0.4	0.006	7	91.83
action18	0.01	0.4	0.011	7	91.83
action19	0.01	0.4	0.0085	7	91.83
action20	0.01	0.4	0.009	7	91.83
action21	0.01	0.5	0.006	6.2	96.95
action22	0.01	0.5	0.011	6.1	96.95
action23	0.01	0.5	0.0085	6.1	96.95
action24	0.01	0.5	0.009	6.1	96.95
action25	0.01	0.6	0.006	5.2	98.73
action26	0.01	0.6	0.011	5.2	98.73
action27	0.01	0.6	0.0085	5.2	98.73
action28	0.01	0.6	0.009	5.2	98.73
action29	0.01	0.7	0.006	4.9	99.62
action30	0.01	0.7	0.011	4.9	99.62
action31	0.01	0.7	0.0085	4.9	99.62
action32	0.01	0.7	0.009	4.9	99.62
action33	0.01	0.8	0.006	4.1	99.93
action34	0.01	0.8	0.011	4	99.93
action35	0.01	0.8	0.0085	4	99.93
action36	0.01	0.8	0.009	4	99.93
action37	0.01	0.9	0.006	4	100
action38	0.01	0.9	0.011	4	100
action39	0.01	0.9	0.0085	4	100
action40	0.01	0.9	0.009	4	100
action41	0.02	0.01	0.006	1	1.97
action42	0.02	0.01	0.011	1	1.97
action43	0.02	0.01	0.0085	1	1.97
action44	0.02	0.01	0.009	1	1.97
action45	0.02	0.1	0.006	8.2	20.18
action46	0.02	0.1	0.011	8.2	20.18
action47	0.02	0.1	0.0085	8.2	20.18
action48	0.02	0.1	0.009	8.9	19.55
action49	0.02	0.2	0.006	9.3	58.52
action50	0.02	0.2	0.011	9.3	58.52
action51	0.02	0.2	0.0085	9.3	58.52
action52	0.02	0.2	0.009	9.8	58.37
action53	0.02	0.3	0.006	7.7	81.13
action54	0.02	0.3	0.011	7.7	81.13
action55	0.02	0.3	0.0085	7.7	81.13
action56	0.02	0.3	0.009	7.6	81.13
action57	0.02	0.4	0.006	6.8	91.83
action58	0.02	0.4	0.011	6.8	91.83
action59	0.02	0.4	0.0085	6.8	91.83
action60	0.02	0.4	0.009	6.8	91.83
action61	0.02	0.5	0.006	5.7	96.95
action62	0.02	0.5	0.011	5.7	96.95
action63	0.02	0.5	0.0085	5.7	96.95
action64	0.02	0.5	0.009	5.8	96.95
action65	0.02	0.6	0.006	5.1	98.73
action66	0.02	0.6	0.011	5.1	98.73
action67	0.02	0.6	0.0085	5.1	98.73
action68	0.02	0.6	0.009	4.9	98.73
action69	0.02	0.7	0.006	4.3	99.62
action70	0.02	0.7	0.011	4.3	99.62
action71	0.02	0.7	0.0085	4.3	99.62
action72	0.02	0.7	0.009	4.4	99.62
action73	0.02	0.8	0.006	4	99.93
action74	0.02	0.8	0.011	4	99.93
action75	0.02	0.8	0.0085	4	99.93
action76	0.02	0.8	0.009	4	99.93
action77	0.02	0.9	0.006	4	100
action78	0.02	0.9	0.011	4	100
action79	0.02	0.9	0.0085	4	100
action80	0.02	0.9	0.009	4	100
action81	0.03	0.01	0.006	1	3.02
action82	0.03	0.01	0.011	1	3.02
action83	0.03	0.01	0.0085	1	3.02
action84	0.03	0.01	0.009	1	3.02
action85	0.03	0.1	0.006	7.7	22.26
action86	0.03	0.1	0.011	7.6	22.47
action87	0.03	0.1	0.0085	7.6	22.47
action88	0.03	0.1	0.009	6.9	22.1
action89	0.03	0.2	0.006	9	58.83
action90	0.03	0.2	0.011	8.9	58.83
action91	0.03	0.2	0.0085	8.9	58.83
action92	0.03	0.2	0.009	9	58.58
action93	0.03	0.3	0.006	7.1	81.13
action94	0.03	0.3	0.011	7.3	81.13
action95	0.03	0.3	0.0085	7.3	81.13
action96	0.03	0.3	0.009	7.5	81.13
action97	0.03	0.4	0.006	6.5	91.83
action98	0.03	0.4	0.011	6.6	91.83
action99	0.03	0.4	0.0085	6.6	91.83
action100	0.03	0.4	0.009	6.7	91.83
action101	0.03	0.5	0.006	5.5	96.95
action102	0.03	0.5	0.011	5.5	96.95
action103	0.03	0.5	0.0085	5.5	96.95
action104	0.03	0.5	0.009	5.6	96.95
action105	0.03	0.6	0.006	4.9	98.73
action106	0.03	0.6	0.011	4.8	98.73
action107	0.03	0.6	0.0085	4.8	98.73
action108	0.03	0.6	0.009	4.7	98.73
action109	0.03	0.7	0.006	4.3	99.62
action110	0.03	0.7	0.011	4.3	99.62
action111	0.03	0.7	0.0085	4.3	99.62
action112	0.03	0.7	0.009	4.3	99.62
action113	0.03	0.8	0.006	4	99.93
action114	0.03	0.8	0.011	4	99.93
action115	0.03	0.8	0.0085	4	99.93
action116	0.03	0.8	0.009	4	99.93
action117	0.03	0.9	0.006	3.8	100
action118	0.03	0.9	0.011	3.8	100
action119	0.03	0.9	0.0085	3.8	100
action120	0.03	0.9	0.009	3.8	100
action121	0.04	0.01	0.006	1	3.94
action122	0.04	0.01	0.011	1	3.94
action123	0.04	0.01	0.0085	1	3.94
action124	0.04	0.01	0.009	1	3.94
action125	0.04	0.1	0.006	6.9	24.82
action126	0.04	0.1	0.011	6.9	24.11
action127	0.04	0.1	0.0085	6.9	24.11
action128	0.04	0.1	0.009	6.7	23.88
action129	0.04	0.2	0.006	8.6	58.83
action130	0.04	0.2	0.011	8.8	58.84
action131	0.04	0.2	0.0085	8.8	58.84
action132	0.04	0.2	0.009	8.9	58.83
action133	0.04	0.3	0.006	7.1	81.13
action134	0.04	0.3	0.011	7.1	81.13
action135	0.04	0.3	0.0085	7.1	81.13
action136	0.04	0.3	0.009	7.1	81.13
action137	0.04	0.4	0.006	6.5	91.83
action138	0.04	0.4	0.011	6.5	91.83
action139	0.04	0.4	0.0085	6.5	91.83
action140	0.04	0.4	0.009	6.5	91.83
action141	0.04	0.5	0.006	5.5	96.95
action142	0.04	0.5	0.011	5.5	96.95
action143	0.04	0.5	0.0085	5.5	96.95
action144	0.04	0.5	0.009	5.5	96.95
action145	0.04	0.6	0.006	4.7	98.73
action146	0.04	0.6	0.011	4.7	98.73
action147	0.04	0.6	0.0085	4.7	98.73
action148	0.04	0.6	0.009	4.7	98.73
action149	0.04	0.7	0.006	4.3	99.62
action150	0.04	0.7	0.011	4.3	99.62
action151	0.04	0.7	0.0085	4.3	99.62
action152	0.04	0.7	0.009	4.3	99.62
action153	0.04	0.8	0.006	4	99.93
action154	0.04	0.8	0.011	4	99.93
action155	0.04	0.8	0.0085	4	99.93
action156	0.04	0.8	0.009	4	99.93
action157	0.04	0.9	0.006	3.5	100
action158	0.04	0.9	0.011	3.6	100
action159	0.04	0.9	0.0085	3.6	100
action160	0.04	0.9	0.009	3.7	100
action161	0.05	0.01	0.006	1	4.99
action162	0.05	0.01	0.011	1	4.99
action163	0.05	0.01	0.0085	1	4.99
action164	0.05	0.01	0.009	1	4.99
action165	0.05	0.1	0.006	6.4	25.97
action166	0.05	0.1	0.011	6.8	26.04
action167	0.05	0.1	0.0085	6.8	26.04
action168	0.05	0.1	0.009	6.7	25.57
action169	0.05	0.2	0.006	8.1	59.22
action170	0.05	0.2	0.011	8.1	59.12
action171	0.05	0.2	0.0085	8.1	59.12
action172	0.05	0.2	0.009	8.4	58.99
action173	0.05	0.3	0.006	7	81.13
action174	0.05	0.3	0.011	7	81.13
action175	0.05	0.3	0.0085	7	81.13
action176	0.05	0.3	0.009	7	81.13
action177	0.05	0.4	0.006	6.4	91.83
action178	0.05	0.4	0.011	6.4	91.83
action179	0.05	0.4	0.0085	6.4	91.83
action180	0.05	0.4	0.009	6.4	91.83
action181	0.05	0.5	0.006	5.5	96.95
action182	0.05	0.5	0.011	5.5	96.95
action183	0.05	0.5	0.0085	5.5	96.95
action184	0.05	0.5	0.009	5.5	96.95
action185	0.05	0.6	0.006	4.7	98.73
action186	0.05	0.6	0.011	4.7	98.73
action187	0.05	0.6	0.0085	4.7	98.73
action188	0.05	0.6	0.009	4.7	98.73
action189	0.05	0.7	0.006	4.3	99.62
action190	0.05	0.7	0.011	4.3	99.62
action191	0.05	0.7	0.0085	4.3	99.62
action192	0.05	0.7	0.009	4.3	99.62
action193	0.05	0.8	0.006	4	99.93
action194	0.05	0.8	0.011	4	99.93
action195	0.05	0.8	0.0085	4	99.93
action196	0.05	0.8	0.009	4	99.93
action197	0.05	0.9	0.006	3.4	100
action198	0.05	0.9	0.011	3.4	100
action199	0.05	0.9	0.0085	3.4	100
action200	0.05	0.9	0.009	3.5	100
action201	0.06	0.01	0.006	1	6.04
action202	0.06	0.01	0.011	1	6.04
action203	0.06	0.01	0.0085	1	6.04
action204	0.06	0.01	0.009	1	6.04
action205	0.06	0.1	0.006	6.2	27.32
action206	0.06	0.1	0.011	6.2	27.32
action207	0.06	0.1	0.0085	6.2	27.32
action208	0.06	0.1	0.009	6.6	27.03
action209	0.06	0.2	0.006	8.1	59.5
action210	0.06	0.2	0.011	8.1	59.36
action211	0.06	0.2	0.0085	8.1	59.36
action212	0.06	0.2	0.009	8.1	59.47
action213	0.06	0.3	0.006	6.9	81.17
action214	0.06	0.3	0.011	6.9	81.13
action215	0.06	0.3	0.0085	6.9	81.13
action216	0.06	0.3	0.009	7	81.2
action217	0.06	0.4	0.006	6.4	91.83
action218	0.06	0.4	0.011	6.4	91.83
action219	0.06	0.4	0.0085	6.4	91.83
action220	0.06	0.4	0.009	6.4	91.83
action221	0.06	0.5	0.006	5.5	96.95
action222	0.06	0.5	0.011	5.5	96.95
action223	0.06	0.5	0.0085	5.5	96.95
action224	0.06	0.5	0.009	5.5	96.95
action225	0.06	0.6	0.006	4.7	98.73
action226	0.06	0.6	0.011	4.7	98.73
action227	0.06	0.6	0.0085	4.7	98.73
action228	0.06	0.6	0.009	4.7	98.73
action229	0.06	0.7	0.006	4.3	99.62
action230	0.06	0.7	0.011	4.3	99.62
action231	0.06	0.7	0.0085	4.3	99.62
action232	0.06	0.7	0.009	4.3	99.62
action233	0.06	0.8	0.006	4	99.93
action234	0.06	0.8	0.011	4	99.93
action235	0.06	0.8	0.0085	4	99.93
action236	0.06	0.8	0.009	3.9	99.93
action237	0.06	0.9	0.006	3.3	100
action238	0.06	0.9	0.011	3.2	100
action239	0.06	0.9	0.0085	3.2	100
action240	0.06	0.9	0.009	3.5	100
action241	0.07	0.01	0.006	1	6.96
action242	0.07	0.01	0.011	1	6.96
action243	0.07	0.01	0.0085	1	6.96
action244	0.07	0.01	0.009	1	6.96
action245	0.07	0.1	0.006	6.1	28.44
action246	0.07	0.1	0.011	6.1	28.29
action247	0.07	0.1	0.0085	6.1	28.29
action248	0.07	0.1	0.009	6.3	28.27
action249	0.07	0.2	0.006	8.1	59.87
action250	0.07	0.2	0.011	7.5	59.72
action251	0.07	0.2	0.0085	7.5	59.72
action252	0.07	0.2	0.009	7.8	59.88
action253	0.07	0.3	0.006	6.8	81.24
action254	0.07	0.3	0.011	6.8	81.13
action255	0.07	0.3	0.0085	6.8	81.13
action256	0.07	0.3	0.009	7	81.26
action257	0.07	0.4	0.006	6.4	91.83
action258	0.07	0.4	0.011	6.4	91.83
action259	0.07	0.4	0.0085	6.4	91.83
action260	0.07	0.4	0.009	6.4	91.83
action261	0.07	0.5	0.006	5.5	96.95
action262	0.07	0.5	0.011	5.5	96.95
action263	0.07	0.5	0.0085	5.5	96.95
action264	0.07	0.5	0.009	5.5	96.95
action265	0.07	0.6	0.006	4.7	98.73
action266	0.07	0.6	0.011	4.7	98.73
action267	0.07	0.6	0.0085	4.7	98.73
action268	0.07	0.6	0.009	4.6	98.73
action269	0.07	0.7	0.006	4.3	99.62
action270	0.07	0.7	0.011	4.3	99.62
action271	0.07	0.7	0.0085	4.3	99.62
action272	0.07	0.7	0.009	4.3	99.62
action273	0.07	0.8	0.006	3.9	99.93
action274	0.07	0.8	0.011	4	99.93
action275	0.07	0.8	0.0085	4	99.93
action276	0.07	0.8	0.009	3.9	99.93
action277	0.07	0.9	0.006	3.2	100
action278	0.07	0.9	0.011	3.2	100
action279	0.07	0.9	0.0085	3.2	100
action280	0.07	0.9	0.009	3.3	100
action281	0.08	0.01	0.006	1	8.02
action282	0.08	0.01	0.011	1	8.02
action283	0.08	0.01	0.0085	1	8.02
action284	0.08	0.01	0.009	1	8.02
action285	0.08	0.1	0.006	5.9	30.08
action286	0.08	0.1	0.011	6	29.8
action287	0.08	0.1	0.0085	6	29.8
action288	0.08	0.1	0.009	6.1	29.58
action289	0.08	0.2	0.006	7.8	60.33
action290	0.08	0.2	0.011	7.5	60.13
action291	0.08	0.2	0.0085	7.5	60.13
action292	0.08	0.2	0.009	7.8	60.42
action293	0.08	0.3	0.006	6.8	81.3
action294	0.08	0.3	0.011	6.7	81.24
action295	0.08	0.3	0.0085	6.7	81.24
action296	0.08	0.3	0.009	6.7	81.35
action297	0.08	0.4	0.006	6.3	91.84
action298	0.08	0.4	0.011	6.3	91.83
action299	0.08	0.4	0.0085	6.3	91.83
action300	0.08	0.4	0.009	6.3	91.84
action301	0.08	0.5	0.006	5.4	96.95
action302	0.08	0.5	0.011	5.4	96.95
action303	0.08	0.5	0.0085	5.4	96.95
action304	0.08	0.5	0.009	5.5	96.96
action305	0.08	0.6	0.006	4.6	98.73
action306	0.08	0.6	0.011	4.7	98.73
action307	0.08	0.6	0.0085	4.7	98.73
action308	0.08	0.6	0.009	4.6	98.73
action309	0.08	0.7	0.006	4.2	99.62
action310	0.08	0.7	0.011	4.3	99.62
action311	0.08	0.7	0.0085	4.3	99.62
action312	0.08	0.7	0.009	4.3	99.62
action313	0.08	0.8	0.006	3.8	99.93
action314	0.08	0.8	0.011	3.9	99.93
action315	0.08	0.8	0.0085	3.9	99.93
action316	0.08	0.8	0.009	3.9	99.93
action317	0.08	0.9	0.006	3.2	100
action318	0.08	0.9	0.011	3.2	100
action319	0.08	0.9	0.0085	3.2	100
action320	0.08	0.9	0.009	3.3	100
action321	0.09	0.01	0.006	1	8.94
action322	0.09	0.01	0.011	1	8.94
action323	0.09	0.01	0.0085	1	8.94
action324	0.09	0.01	0.009	1	8.94
action325	0.09	0.1	0.006	5.7	31.16
action326	0.09	0.1	0.011	6	31.12
action327	0.09	0.1	0.0085	6	31.12
action328	0.09	0.1	0.009	6.2	30.72
action329	0.09	0.2	0.006	7.4	60.47
action330	0.09	0.2	0.011	6.8	60.51
action331	0.09	0.2	0.0085	6.8	60.51
action332	0.09	0.2	0.009	7.2	60.95
action333	0.09	0.3	0.006	6.6	81.3
action334	0.09	0.3	0.011	6.6	81.31
action335	0.09	0.3	0.0085	6.6	81.31
action336	0.09	0.3	0.009	6.6	81.48
action337	0.09	0.4	0.006	6.3	91.84
action338	0.09	0.4	0.011	6.3	91.84
action339	0.09	0.4	0.0085	6.3	91.84
action340	0.09	0.4	0.009	6.2	91.88
action341	0.09	0.5	0.006	5.4	96.95
action342	0.09	0.5	0.011	5.4	96.95
action343	0.09	0.5	0.0085	5.4	96.95
action344	0.09	0.5	0.009	5.5	96.98
action345	0.09	0.6	0.006	4.6	98.73
action346	0.09	0.6	0.011	4.7	98.73
action347	0.09	0.6	0.0085	4.7	98.73
action348	0.09	0.6	0.009	4.6	98.73
action349	0.09	0.7	0.006	4.2	99.62
action350	0.09	0.7	0.011	4.2	99.62
action351	0.09	0.7	0.0085	4.2	99.62
action352	0.09	0.7	0.009	4.3	99.62
action353	0.09	0.8	0.006	3.8	99.93
action354	0.09	0.8	0.011	3.8	99.93
action355	0.09	0.8	0.0085	3.8	99.93
action356	0.09	0.8	0.009	3.9	99.93
action357	0.09	0.9	0.006	3.2	100
action358	0.09	0.9	0.011	3.2	100
action359	0.09	0.9	0.0085	3.2	100
action360	0.09	0.9	0.009	3.2	100
action361	0.1	0.01	0.006	1	9.99
action362	0.1	0.01	0.011	1	9.99
action363	0.1	0.01	0.0085	1	9.99
action364	0.1	0.01	0.009	1	9.99
action365	0.1	0.1	0.006	5.7	32.27
action366	0.1	0.1	0.011	5.8	32.59
action367	0.1	0.1	0.0085	5.8	32.59
action368	0.1	0.1	0.009	5.9	31.81
action369	0.1	0.2	0.006	6.9	60.95
action370	0.1	0.2	0.011	6.8	61.21
action371	0.1	0.2	0.0085	6.8	61.21
action372	0.1	0.2	0.009	7.2	61.38
action373	0.1	0.3	0.006	6.5	81.34
action374	0.1	0.3	0.011	6.5	81.51
action375	0.1	0.3	0.0085	6.5	81.51
action376	0.1	0.3	0.009	6.5	81.52
action377	0.1	0.4	0.006	6.2	91.84
action378	0.1	0.4	0.011	6.1	91.91
action379	0.1	0.4	0.0085	6.1	91.91
action380	0.1	0.4	0.009	6.2	91.88
action381	0.1	0.5	0.006	5.3	96.95
action382	0.1	0.5	0.011	5.3	96.95
action383	0.1	0.5	0.0085	5.3	96.95
action384	0.1	0.5	0.009	5.5	96.98
action385	0.1	0.6	0.006	4.6	98.73
action386	0.1	0.6	0.011	4.6	98.73
action387	0.1	0.6	0.0085	4.6	98.73
action388	0.1	0.6	0.009	4.6	98.73
action389	0.1	0.7	0.006	4.2	99.62
action390	0.1	0.7	0.011	4.2	99.62
action391	0.1	0.7	0.0085	4.2	99.62
action392	0.1	0.7	0.009	4.2	99.62
action393	0.1	0.8	0.006	3.6	99.93
action394	0.1	0.8	0.011	3.7	99.93
action395	0.1	0.8	0.0085	3.7	99.93
action396	0.1	0.8	0.009	3.9	99.93
action397	0.1	0.9	0.006	3.2	100
action398	0.1	0.9	0.011	3.2	100
action399	0.1	0.9	0.0085	3.2	100
action400	0.1	0.9	0.009	3.2	100
Preferences	Seeding Fraction	Average PP	Measure	Average Last Iteration	Average Coverage
active	yes	yes	yes	yes	yes
Min/Max	min	min	min	max	max
Weight	1	1	1	1	1
Preference function	V-shape	V-shape	V-shape	V-shape	V-shape
Thresholds	absolute	absolute	absolute	absolute	absolute
q	1	1	1	1	1
p	0.03	0.29	0.0019	2.09	32.76
s	3	3	3	3	3
Unicriterion flows	Seeding Fraction	Average PP	Measure	Average Last Iteration	Average Coverage
action1	0.802	0.7985	0.7519	-0.9023	-0.8913
action2	0.802	0.7985	-0.7519	-0.9023	-0.8913
action3	0.802	0.7985	0.066	-0.9023	-0.8913
action4	0.802	0.7985	-0.066	-0.9023	-0.8913
action5	0.802	0.6741	0.7519	0.9473	-0.7944
action6	0.802	0.6741	-0.7519	0.9473	-0.7943
action7	0.802	0.6741	0.066	0.9473	-0.7943
action8	0.802	0.6741	-0.066	0.9226	-0.7962
action9	0.802	0.5047	0.7519	0.9751	-0.4807
action10	0.802	0.5047	-0.7519	0.9751	-0.4807
action11	0.802	0.5047	0.066	0.9751	-0.4807
action12	0.802	0.5047	-0.066	0.9695	-0.4807
action13	0.802	0.3008	0.7519	0.7372	-0.0404
action14	0.802	0.3008	-0.7519	0.7181	-0.0404
action15	0.802	0.3008	0.066	0.7181	-0.0404
action16	0.802	0.3008	-0.066	0.7743	-0.0404
action17	0.802	0.1003	0.7519	0.5415	0.221
action18	0.802	0.1003	-0.7519	0.5415	0.221
action19	0.802	0.1003	0.066	0.5415	0.221
action20	0.802	0.1003	-0.066	0.5415	0.221
action21	0.802	-0.1003	0.7519	0.3267	0.3325
action22	0.802	-0.1003	-0.7519	0.2957	0.3325
action23	0.802	-0.1003	0.066	0.2957	0.3325
action24	0.802	-0.1003	-0.066	0.2957	0.3325
action25	0.802	-0.3008	0.7519	-0.0207	0.3706
action26	0.802	-0.3008	-0.7519	-0.0207	0.3706
action27	0.802	-0.3008	0.066	-0.0207	0.3706
action28	0.802	-0.3008	-0.066	-0.0207	0.3706
action29	0.802	-0.5013	0.7519	-0.1291	0.3897
action30	0.802	-0.5013	-0.7519	-0.1291	0.3897
action31	0.802	-0.5013	0.066	-0.1291	0.3897
action32	0.802	-0.5013	-0.066	-0.1291	0.3897
action33	0.802	-0.6706	0.7519	-0.3735	0.3963
action34	0.802	-0.6706	-0.7519	-0.3992	0.3963
action35	0.802	-0.6706	0.066	-0.3992	0.3963
action36	0.802	-0.6706	-0.066	-0.3992	0.3963
action37	0.802	-0.8055	0.7519	-0.3992	0.3978
action38	0.802	-0.8055	-0.7519	-0.3992	0.3978
action39	0.802	-0.8055	0.066	-0.3992	0.3978
action40	0.802	-0.8055	-0.066	-0.3992	0.3978
action41	0.6683	0.7985	0.7519	-0.9023	-0.8857
action42	0.6683	0.7985	-0.7519	-0.9023	-0.8857
action43	0.6683	0.7985	0.066	-0.9023	-0.8857
action44	0.6683	0.7985	-0.066	-0.9023	-0.8857
action45	0.6683	0.6741	0.7519	0.7923	-0.7743
action46	0.6683	0.6741	-0.7519	0.7923	-0.7743
action47	0.6683	0.6741	0.066	0.7923	-0.7743
action48	0.6683	0.6741	-0.066	0.8904	-0.7781
action49	0.6683	0.5047	0.7519	0.9226	-0.4795
action50	0.6683	0.5047	-0.7519	0.9226	-0.4795
action51	0.6683	0.5047	0.066	0.9226	-0.4795
action52	0.6683	0.5047	-0.066	0.9525	-0.4807
action53	0.6683	0.3008	0.7519	0.6986	-0.0404
action54	0.6683	0.3008	-0.7519	0.6986	-0.0404
action55	0.6683	0.3008	0.066	0.6986	-0.0404
action56	0.6683	0.3008	-0.066	0.6789	-0.0404
action57	0.6683	0.1003	0.7519	0.4935	0.221
action58	0.6683	0.1003	-0.7519	0.4935	0.221
action59	0.6683	0.1003	0.066	0.4935	0.221
action60	0.6683	0.1003	-0.066	0.4935	0.221
action61	0.6683	-0.1003	0.7519	0.1565	0.3325
action62	0.6683	-0.1003	-0.7519	0.1565	0.3325
action63	0.6683	-0.1003	0.066	0.1565	0.3325
action64	0.6683	-0.1003	-0.066	0.192	0.3325
action65	0.6683	-0.3008	0.7519	-0.0572	0.3706
action66	0.6683	-0.3008	-0.7519	-0.0572	0.3706
action67	0.6683	-0.3008	0.066	-0.0572	0.3706
action68	0.6683	-0.3008	-0.066	-0.1291	0.3706
action69	0.6683	-0.5013	0.7519	-0.3192	0.3897
action70	0.6683	-0.5013	-0.7519	-0.3192	0.3897
action71	0.6683	-0.5013	0.066	-0.3192	0.3897
action72	0.6683	-0.5013	-0.066	-0.2901	0.3897
action73	0.6683	-0.6706	0.7519	-0.3992	0.3963
action74	0.6683	-0.6706	-0.7519	-0.3992	0.3963
action75	0.6683	-0.6706	0.066	-0.3992	0.3963
action76	0.6683	-0.6706	-0.066	-0.3992	0.3963
action77	0.6683	-0.8055	0.7519	-0.3992	0.3978
action78	0.6683	-0.8055	-0.7519	-0.3992	0.3978
action79	0.6683	-0.8055	0.066	-0.3992	0.3978
action80	0.6683	-0.8055	-0.066	-0.3992	0.3978
action81	0.5013	0.7985	0.7519	-0.9023	-0.8793
action82	0.5013	0.7985	-0.7519	-0.9023	-0.8793
action83	0.5013	0.7985	0.066	-0.9023	-0.8793
action84	0.5013	0.7985	-0.066	-0.9023	-0.8793
action85	0.5013	0.6741	0.7519	0.6986	-0.7615
action86	0.5013	0.6741	-0.7519	0.6789	-0.7603
action87	0.5013	0.6741	0.066	0.6789	-0.7603
action88	0.5013	0.6741	-0.066	0.5175	-0.7625
action89	0.5013	0.5047	0.7519	0.8999	-0.4771
action90	0.5013	0.5047	-0.7519	0.8904	-0.4771
action91	0.5013	0.5047	0.066	0.8904	-0.4771
action92	0.5013	0.5047	-0.066	0.8999	-0.4791
action93	0.5013	0.3008	0.7519	0.5649	-0.0404
action94	0.5013	0.3008	-0.7519	0.6117	-0.0404
action95	0.5013	0.3008	0.066	0.6117	-0.0404
action96	0.5013	0.3008	-0.066	0.6573	-0.0404
action97	0.5013	0.1003	0.7519	0.4141	0.221
action98	0.5013	0.1003	-0.7519	0.441	0.221
action99	0.5013	0.1003	0.066	0.441	0.221
action100	0.5013	0.1003	-0.066	0.4677	0.221
action101	0.5013	-0.1003	0.7519	0.086	0.3325
action102	0.5013	-0.1003	-0.7519	0.086	0.3325
action103	0.5013	-0.1003	0.066	0.086	0.3325
action104	0.5013	-0.1003	-0.066	0.1212	0.3325
action105	0.5013	-0.3008	0.7519	-0.1291	0.3706
action106	0.5013	-0.3008	-0.7519	-0.1636	0.3706
action107	0.5013	-0.3008	0.066	-0.1636	0.3706
action108	0.5013	-0.3008	-0.066	-0.197	0.3706
action109	0.5013	-0.5013	0.7519	-0.3192	0.3897
action110	0.5013	-0.5013	-0.7519	-0.3192	0.3897
action111	0.5013	-0.5013	0.066	-0.3192	0.3897
action112	0.5013	-0.5013	-0.066	-0.3192	0.3897
action113	0.5013	-0.6706	0.7519	-0.3992	0.3963
action114	0.5013	-0.6706	-0.7519	-0.3992	0.3963
action115	0.5013	-0.6706	0.066	-0.3992	0.3963
action116	0.5013	-0.6706	-0.066	-0.3992	0.3963
action117	0.5013	-0.8055	0.7519	-0.448	0.3978
action118	0.5013	-0.8055	-0.7519	-0.448	0.3978
action119	0.5013	-0.8055	0.066	-0.448	0.3978
action120	0.5013	-0.8055	-0.066	-0.448	0.3978
action121	0.3008	0.7985	0.7519	-0.9023	-0.8737
action122	0.3008	0.7985	-0.7519	-0.9023	-0.8737
action123	0.3008	0.7985	0.066	-0.9023	-0.8737
action124	0.3008	0.7985	-0.066	-0.9023	-0.8737
action125	0.3008	0.6741	0.7519	0.5175	-0.7459
action126	0.3008	0.6741	-0.7519	0.5175	-0.7502
action127	0.3008	0.6741	0.066	0.5175	-0.7502
action128	0.3008	0.6741	-0.066	0.4677	-0.7516
action129	0.3008	0.5047	0.7519	0.8546	-0.4771
action130	0.3008	0.5047	-0.7519	0.8793	-0.477
action131	0.3008	0.5047	0.066	0.8793	-0.477
action132	0.3008	0.5047	-0.066	0.8904	-0.4771
action133	0.3008	0.3008	0.7519	0.5649	-0.0404
action134	0.3008	0.3008	-0.7519	0.5649	-0.0404
action135	0.3008	0.3008	0.066	0.5649	-0.0404
action136	0.3008	0.3008	-0.066	0.5649	-0.0404
action137	0.3008	0.1003	0.7519	0.4141	0.221
action138	0.3008	0.1003	-0.7519	0.4141	0.221
action139	0.3008	0.1003	0.066	0.4141	0.221
action140	0.3008	0.1003	-0.066	0.4141	0.221
action141	0.3008	-0.1003	0.7519	0.086	0.3325
action142	0.3008	-0.1003	-0.7519	0.086	0.3325
action143	0.3008	-0.1003	0.066	0.086	0.3325
action144	0.3008	-0.1003	-0.066	0.086	0.3325
action145	0.3008	-0.3008	0.7519	-0.197	0.3706
action146	0.3008	-0.3008	-0.7519	-0.197	0.3706
action147	0.3008	-0.3008	0.066	-0.197	0.3706
action148	0.3008	-0.3008	-0.066	-0.197	0.3706
action149	0.3008	-0.5013	0.7519	-0.3192	0.3897
action150	0.3008	-0.5013	-0.7519	-0.3192	0.3897
action151	0.3008	-0.5013	0.066	-0.3192	0.3897
action152	0.3008	-0.5013	-0.066	-0.3192	0.3897
action153	0.3008	-0.6706	0.7519	-0.3992	0.3963
action154	0.3008	-0.6706	-0.7519	-0.3992	0.3963
action155	0.3008	-0.6706	0.066	-0.3992	0.3963
action156	0.3008	-0.6706	-0.066	-0.3992	0.3963
action157	0.3008	-0.8055	0.7519	-0.5185	0.3978
action158	0.3008	-0.8055	-0.7519	-0.4955	0.3978
action159	0.3008	-0.8055	0.066	-0.4955	0.3978
action160	0.3008	-0.8055	-0.066	-0.472	0.3978
action161	0.1003	0.7985	0.7519	-0.9023	-0.8672
action162	0.1003	0.7985	-0.7519	-0.9023	-0.8672
action163	0.1003	0.7985	0.066	-0.9023	-0.8672
action164	0.1003	0.7985	-0.066	-0.9023	-0.8672
action165	0.1003	0.6741	0.7519	0.3873	-0.7386
action166	0.1003	0.6741	-0.7519	0.4935	-0.7382
action167	0.1003	0.6741	0.066	0.4935	-0.7382
action168	0.1003	0.6741	-0.066	0.4677	-0.7413
action169	0.1003	0.5047	0.7519	0.7743	-0.4737
action170	0.1003	0.5047	-0.7519	0.7743	-0.4748
action171	0.1003	0.5047	0.066	0.7743	-0.4748
action172	0.1003	0.5047	-0.066	0.8255	-0.4759
action173	0.1003	0.3008	0.7519	0.5415	-0.0404
action174	0.1003	0.3008	-0.7519	0.5415	-0.0404
action175	0.1003	0.3008	0.066	0.5415	-0.0404
action176	0.1003	0.3008	-0.066	0.5415	-0.0404
action177	0.1003	0.1003	0.7519	0.3873	0.221
action178	0.1003	0.1003	-0.7519	0.3873	0.221
action179	0.1003	0.1003	0.066	0.3873	0.221
action180	0.1003	0.1003	-0.066	0.3873	0.221
action181	0.1003	-0.1003	0.7519	0.086	0.3325
action182	0.1003	-0.1003	-0.7519	0.086	0.3325
action183	0.1003	-0.1003	0.066	0.086	0.3325
action184	0.1003	-0.1003	-0.066	0.086	0.3325
action185	0.1003	-0.3008	0.7519	-0.197	0.3706
action186	0.1003	-0.3008	-0.7519	-0.197	0.3706
action187	0.1003	-0.3008	0.066	-0.197	0.3706
action188	0.1003	-0.3008	-0.066	-0.197	0.3706
action189	0.1003	-0.5013	0.7519	-0.3192	0.3897
action190	0.1003	-0.5013	-0.7519	-0.3192	0.3897
action191	0.1003	-0.5013	0.066	-0.3192	0.3897
action192	0.1003	-0.5013	-0.066	-0.3192	0.3897
action193	0.1003	-0.6706	0.7519	-0.3992	0.3963
action194	0.1003	-0.6706	-0.7519	-0.3992	0.3963
action195	0.1003	-0.6706	0.066	-0.3992	0.3963
action196	0.1003	-0.6706	-0.066	-0.3992	0.3963
action197	0.1003	-0.8055	0.7519	-0.5412	0.3978
action198	0.1003	-0.8055	-0.7519	-0.5412	0.3978
action199	0.1003	-0.8055	0.066	-0.5412	0.3978
action200	0.1003	-0.8055	-0.066	-0.5185	0.3978
action201	-0.1003	0.7985	0.7519	-0.9023	-0.8608
action202	-0.1003	0.7985	-0.7519	-0.9023	-0.8608
action203	-0.1003	0.7985	0.066	-0.9023	-0.8608
action204	-0.1003	0.7985	-0.066	-0.9023	-0.8608
action205	-0.1003	0.6741	0.7519	0.3267	-0.7282
action206	-0.1003	0.6741	-0.7519	0.3267	-0.7282
action207	-0.1003	0.6741	0.066	0.3267	-0.7282
action208	-0.1003	0.6741	-0.066	0.441	-0.7306
action209	-0.1003	0.5047	0.7519	0.7743	-0.4707
action210	-0.1003	0.5047	-0.7519	0.7743	-0.4722
action211	-0.1003	0.5047	0.066	0.7743	-0.4722
action212	-0.1003	0.5047	-0.066	0.7743	-0.471
action213	-0.1003	0.3008	0.7519	0.5175	-0.0394
action214	-0.1003	0.3008	-0.7519	0.5175	-0.0404
action215	-0.1003	0.3008	0.066	0.5175	-0.0404
action216	-0.1003	0.3008	-0.066	0.5415	-0.0387
action217	-0.1003	0.1003	0.7519	0.3873	0.221
action218	-0.1003	0.1003	-0.7519	0.3873	0.221
action219	-0.1003	0.1003	0.066	0.3873	0.221
action220	-0.1003	0.1003	-0.066	0.3873	0.221
action221	-0.1003	-0.1003	0.7519	0.086	0.3325
action222	-0.1003	-0.1003	-0.7519	0.086	0.3325
action223	-0.1003	-0.1003	0.066	0.086	0.3325
action224	-0.1003	-0.1003	-0.066	0.086	0.3325
action225	-0.1003	-0.3008	0.7519	-0.197	0.3706
action226	-0.1003	-0.3008	-0.7519	-0.197	0.3706
action227	-0.1003	-0.3008	0.066	-0.197	0.3706
action228	-0.1003	-0.3008	-0.066	-0.197	0.3706
action229	-0.1003	-0.5013	0.7519	-0.3192	0.3897
action230	-0.1003	-0.5013	-0.7519	-0.3192	0.3897
action231	-0.1003	-0.5013	0.066	-0.3192	0.3897
action232	-0.1003	-0.5013	-0.066	-0.3192	0.3897
action233	-0.1003	-0.6706	0.7519	-0.3992	0.3963
action234	-0.1003	-0.6706	-0.7519	-0.3992	0.3963
action235	-0.1003	-0.6706	0.066	-0.3992	0.3963
action236	-0.1003	-0.6706	-0.066	-0.4238	0.3963
action237	-0.1003	-0.8055	0.7519	-0.5614	0.3978
action238	-0.1003	-0.8055	-0.7519	-0.5809	0.3978
action239	-0.1003	-0.8055	0.066	-0.5809	0.3978
action240	-0.1003	-0.8055	-0.066	-0.5185	0.3978
action241	-0.3008	0.7985	0.7519	-0.9023	-0.8552
action242	-0.3008	0.7985	-0.7519	-0.9023	-0.8552
action243	-0.3008	0.7985	0.066	-0.9023	-0.8552
action244	-0.3008	0.7985	-0.066	-0.9023	-0.8552
action245	-0.3008	0.6741	0.7519	0.2957	-0.7184
action246	-0.3008	0.6741	-0.7519	0.2957	-0.7198
action247	-0.3008	0.6741	0.066	0.2957	-0.7198
action248	-0.3008	0.6741	-0.066	0.3575	-0.72
action249	-0.3008	0.5047	0.7519	0.7743	-0.4667
action250	-0.3008	0.5047	-0.7519	0.6573	-0.4683
action251	-0.3008	0.5047	0.066	0.6573	-0.4683
action252	-0.3008	0.5047	-0.066	0.7181	-0.4666
action253	-0.3008	0.3008	0.7519	0.4935	-0.0377
action254	-0.3008	0.3008	-0.7519	0.4935	-0.0404
action255	-0.3008	0.3008	0.066	0.4935	-0.0404
action256	-0.3008	0.3008	-0.066	0.5415	-0.0372
action257	-0.3008	0.1003	0.7519	0.3873	0.221
action258	-0.3008	0.1003	-0.7519	0.3873	0.221
action259	-0.3008	0.1003	0.066	0.3873	0.221
action260	-0.3008	0.1003	-0.066	0.3873	0.221
action261	-0.3008	-0.1003	0.7519	0.086	0.3325
action262	-0.3008	-0.1003	-0.7519	0.086	0.3325
action263	-0.3008	-0.1003	0.066	0.086	0.3325
action264	-0.3008	-0.1003	-0.066	0.086	0.3325
action265	-0.3008	-0.3008	0.7519	-0.197	0.3706
action266	-0.3008	-0.3008	-0.7519	-0.197	0.3706
action267	-0.3008	-0.3008	0.066	-0.197	0.3706
action268	-0.3008	-0.3008	-0.066	-0.2288	0.3706
action269	-0.3008	-0.5013	0.7519	-0.3192	0.3897
action270	-0.3008	-0.5013	-0.7519	-0.3192	0.3897
action271	-0.3008	-0.5013	0.066	-0.3192	0.3897
action272	-0.3008	-0.5013	-0.066	-0.3192	0.3897
action273	-0.3008	-0.6706	0.7519	-0.4238	0.3963
action274	-0.3008	-0.6706	-0.7519	-0.3992	0.3963
action275	-0.3008	-0.6706	0.066	-0.3992	0.3963
action276	-0.3008	-0.6706	-0.066	-0.4238	0.3963
action277	-0.3008	-0.8055	0.7519	-0.5809	0.3978
action278	-0.3008	-0.8055	-0.7519	-0.5809	0.3978
action279	-0.3008	-0.8055	0.066	-0.5809	0.3978
action280	-0.3008	-0.8055	-0.066	-0.5614	0.3978
action281	-0.5013	0.7985	0.7519	-0.9023	-0.8487
action282	-0.5013	0.7985	-0.7519	-0.9023	-0.8487
action283	-0.5013	0.7985	0.066	-0.9023	-0.8487
action284	-0.5013	0.7985	-0.066	-0.9023	-0.8487
action285	-0.5013	0.6741	0.7519	0.2273	-0.7034
action286	-0.5013	0.6741	-0.7519	0.2616	-0.706
action287	-0.5013	0.6741	0.066	0.2616	-0.706
action288	-0.5013	0.6741	-0.066	0.2957	-0.708
action289	-0.5013	0.5047	0.7519	0.7181	-0.4619
action290	-0.5013	0.5047	-0.7519	0.6573	-0.464
action291	-0.5013	0.5047	0.066	0.6573	-0.464
action292	-0.5013	0.5047	-0.066	0.7181	-0.461
action293	-0.5013	0.3008	0.7519	0.4935	-0.0362
action294	-0.5013	0.3008	-0.7519	0.4677	-0.0377
action295	-0.5013	0.3008	0.066	0.4677	-0.0377
action296	-0.5013	0.3008	-0.066	0.4677	-0.035
action297	-0.5013	0.1003	0.7519	0.3575	0.2212
action298	-0.5013	0.1003	-0.7519	0.3575	0.221
action299	-0.5013	0.1003	0.066	0.3575	0.221
action300	-0.5013	0.1003	-0.066	0.3575	0.2212
action301	-0.5013	-0.1003	0.7519	0.0509	0.3325
action302	-0.5013	-0.1003	-0.7519	0.0509	0.3325
action303	-0.5013	-0.1003	0.066	0.0509	0.3325
action304	-0.5013	-0.1003	-0.066	0.086	0.3327
action305	-0.5013	-0.3008	0.7519	-0.2288	0.3706
action306	-0.5013	-0.3008	-0.7519	-0.197	0.3706
action307	-0.5013	-0.3008	0.066	-0.197	0.3706
action308	-0.5013	-0.3008	-0.066	-0.2288	0.3706
action309	-0.5013	-0.5013	0.7519	-0.3468	0.3897
action310	-0.5013	-0.5013	-0.7519	-0.3192	0.3897
action311	-0.5013	-0.5013	0.066	-0.3192	0.3897
action312	-0.5013	-0.5013	-0.066	-0.3192	0.3897
action313	-0.5013	-0.6706	0.7519	-0.448	0.3963
action314	-0.5013	-0.6706	-0.7519	-0.4238	0.3963
action315	-0.5013	-0.6706	0.066	-0.4238	0.3963
action316	-0.5013	-0.6706	-0.066	-0.4238	0.3963
action317	-0.5013	-0.8055	0.7519	-0.5809	0.3978
action318	-0.5013	-0.8055	-0.7519	-0.5809	0.3978
action319	-0.5013	-0.8055	0.066	-0.5809	0.3978
action320	-0.5013	-0.8055	-0.066	-0.5614	0.3978
action321	-0.6683	0.7985	0.7519	-0.9023	-0.8431
action322	-0.6683	0.7985	-0.7519	-0.9023	-0.8431
action323	-0.6683	0.7985	0.066	-0.9023	-0.8431
action324	-0.6683	0.7985	-0.066	-0.9023	-0.8431
action325	-0.6683	0.6741	0.7519	0.1565	-0.6935
action326	-0.6683	0.6741	-0.7519	0.2616	-0.6939
action327	-0.6683	0.6741	0.066	0.2616	-0.6939
action328	-0.6683	0.6741	-0.066	0.3267	-0.6975
action329	-0.6683	0.5047	0.7519	0.6347	-0.4604
action330	-0.6683	0.5047	-0.7519	0.4935	-0.46
action331	-0.6683	0.5047	0.066	0.4935	-0.46
action332	-0.6683	0.5047	-0.066	0.5883	-0.4555
action333	-0.6683	0.3008	0.7519	0.441	-0.0362
action334	-0.6683	0.3008	-0.7519	0.441	-0.036
action335	-0.6683	0.3008	0.066	0.441	-0.036
action336	-0.6683	0.3008	-0.066	0.441	-0.0318
action337	-0.6683	0.1003	0.7519	0.3575	0.2212
action338	-0.6683	0.1003	-0.7519	0.3575	0.2212
action339	-0.6683	0.1003	0.066	0.3575	0.2212
action340	-0.6683	0.1003	-0.066	0.3267	0.2221
action341	-0.6683	-0.1003	0.7519	0.0509	0.3325
action342	-0.6683	-0.1003	-0.7519	0.0509	0.3325
action343	-0.6683	-0.1003	0.066	0.0509	0.3325
action344	-0.6683	-0.1003	-0.066	0.086	0.3331
action345	-0.6683	-0.3008	0.7519	-0.2288	0.3706
action346	-0.6683	-0.3008	-0.7519	-0.197	0.3706
action347	-0.6683	-0.3008	0.066	-0.197	0.3706
action348	-0.6683	-0.3008	-0.066	-0.2288	0.3706
action349	-0.6683	-0.5013	0.7519	-0.3468	0.3897
action350	-0.6683	-0.5013	-0.7519	-0.3468	0.3897
action351	-0.6683	-0.5013	0.066	-0.3468	0.3897
action352	-0.6683	-0.5013	-0.066	-0.3192	0.3897
action353	-0.6683	-0.6706	0.7519	-0.448	0.3963
action354	-0.6683	-0.6706	-0.7519	-0.448	0.3963
action355	-0.6683	-0.6706	0.066	-0.448	0.3963
action356	-0.6683	-0.6706	-0.066	-0.4238	0.3963
action357	-0.6683	-0.8055	0.7519	-0.5809	0.3978
action358	-0.6683	-0.8055	-0.7519	-0.5809	0.3978
action359	-0.6683	-0.8055	0.066	-0.5809	0.3978
action360	-0.6683	-0.8055	-0.066	-0.5809	0.3978
action361	-0.802	0.7985	0.7519	-0.9023	-0.8366
action362	-0.802	0.7985	-0.7519	-0.9023	-0.8366
action363	-0.802	0.7985	0.066	-0.9023	-0.8366
action364	-0.802	0.7985	-0.066	-0.9023	-0.8366
action365	-0.802	0.6741	0.7519	0.1565	-0.6833
action366	-0.802	0.6741	-0.7519	0.192	-0.6804
action367	-0.802	0.6741	0.066	0.192	-0.6804
action368	-0.802	0.6741	-0.066	0.2273	-0.6875
action369	-0.802	0.5047	0.7519	0.5175	-0.4555
action370	-0.802	0.5047	-0.7519	0.4935	-0.4528
action371	-0.802	0.5047	0.066	0.4935	-0.4528
action372	-0.802	0.5047	-0.066	0.5883	-0.4511
action373	-0.802	0.3008	0.7519	0.4141	-0.0353
action374	-0.802	0.3008	-0.7519	0.4141	-0.0311
action375	-0.802	0.3008	0.066	0.4141	-0.0311
action376	-0.802	0.3008	-0.066	0.4141	-0.0309
action377	-0.802	0.1003	0.7519	0.3267	0.2212
action378	-0.802	0.1003	-0.7519	0.2957	0.2228
action379	-0.802	0.1003	0.066	0.2957	0.2228
action380	-0.802	0.1003	-0.066	0.3267	0.2221
action381	-0.802	-0.1003	0.7519	0.0159	0.3325
action382	-0.802	-0.1003	-0.7519	0.0159	0.3325
action383	-0.802	-0.1003	0.066	0.0159	0.3325
action384	-0.802	-0.1003	-0.066	0.086	0.3331
action385	-0.802	-0.3008	0.7519	-0.2288	0.3706
action386	-0.802	-0.3008	-0.7519	-0.2288	0.3706
action387	-0.802	-0.3008	0.066	-0.2288	0.3706
action388	-0.802	-0.3008	-0.066	-0.2288	0.3706
action389	-0.802	-0.5013	0.7519	-0.3468	0.3897
action390	-0.802	-0.5013	-0.7519	-0.3468	0.3897
action391	-0.802	-0.5013	0.066	-0.3468	0.3897
action392	-0.802	-0.5013	-0.066	-0.3468	0.3897
action393	-0.802	-0.6706	0.7519	-0.4955	0.3963
action394	-0.802	-0.6706	-0.7519	-0.472	0.3963
action395	-0.802	-0.6706	0.066	-0.472	0.3963
action396	-0.802	-0.6706	-0.066	-0.4238	0.3963
action397	-0.802	-0.8055	0.7519	-0.5809	0.3978
action398	-0.802	-0.8055	-0.7519	-0.5809	0.3978
action399	-0.802	-0.8055	0.066	-0.5809	0.3978
action400	-0.802	-0.8055	-0.066	-0.5809	0.3978
Multicriteria flows	Phi	Phi+	Phi-	Rank
action9	0.5106	0.6656	0.155	1
action13	0.5103	0.6205	0.1102	2
action17	0.4833	0.5832	0.0999	3
action5	0.4762	0.6489	0.1727	4
action53	0.4758	0.5943	0.1185	5
action49	0.4736	0.6365	0.1629	6
action57	0.447	0.5566	0.1096	7
action89	0.4361	0.613	0.1768	8
action21	0.4226	0.5433	0.1207	9
action45	0.4225	0.6054	0.183	10
action93	0.4157	0.5537	0.138	11
action97	0.3977	0.5265	0.1288	12
action129	0.387	0.5856	0.1986	13
action133	0.3756	0.5337	0.1581	14
action11	0.3734	0.5785	0.2051	15
action85	0.3728	0.5717	0.1989	16
action15	0.3693	0.5303	0.161	17
action61	0.3618	0.5043	0.1425	18
action137	0.3576	0.5064	0.1488	19
action16	0.3541	0.5262	0.1721	20
action19	0.3461	0.4962	0.15	21
action12	0.3459	0.5644	0.2185	22
action7	0.339	0.5618	0.2229	23
action55	0.3386	0.5072	0.1686	24
action51	0.3364	0.5495	0.2131	25
action169	0.3315	0.5522	0.2207	26
action173	0.3308	0.5101	0.1793	27
action25	0.3206	0.4886	0.168	28
action20	0.3198	0.483	0.1632	29
action52	0.3158	0.5413	0.2255	30
action101	0.3143	0.4762	0.1619	31
action177	0.3121	0.4833	0.1711	32
action59	0.3098	0.4695	0.1597	33
action56	0.3083	0.491	0.1827	34
action8	0.3073	0.5443	0.237	35
action125	0.2997	0.5264	0.2267	36
action91	0.297	0.5243	0.2273	37
action209	0.292	0.5323	0.2403	38
action95	0.2878	0.4738	0.186	39
action65	0.2866	0.4648	0.1782	40
action213	0.2861	0.4867	0.2007	41
action47	0.2853	0.5184	0.2331	42
action60	0.2834	0.4563	0.1729	43
action23	0.2792	0.453	0.1738	44
action48	0.2777	0.521	0.2432	45
action141	0.2742	0.4561	0.1819	46
action92	0.2722	0.5126	0.2404	47
action217	0.272	0.4632	0.1912	48
action96	0.2706	0.4676	0.197	49
action99	0.2659	0.4427	0.1768	50
action29	0.2626	0.4596	0.197	51
action131	0.2547	0.5025	0.2478	52
action24	0.2528	0.4398	0.187	53
action249	0.2527	0.5125	0.2598	54
action100	0.2449	0.4329	0.1881	55
action253	0.2415	0.4635	0.222	56
action105	0.2388	0.4374	0.1986	57
action135	0.2384	0.4466	0.2082	58
action165	0.235	0.4909	0.256	59
action181	0.2341	0.4361	0.202	60
action87	0.232	0.4818	0.2498	61
action257	0.2319	0.4432	0.2112	62
action132	0.2306	0.4911	0.2605	63
action63	0.2246	0.4172	0.1926	64
action139	0.2204	0.4193	0.1989	65
action136	0.212	0.4334	0.2214	66
action10	0.2098	0.5152	0.3054	67
action14	0.2057	0.467	0.2613	68
action64	0.2053	0.408	0.2027	69
action289	0.2023	0.4837	0.2814	70
action293	0.2017	0.4435	0.2418	71
action69	0.1979	0.4212	0.2234	72
action171	0.1941	0.4651	0.271	73
action140	0.194	0.4062	0.2121	74
action221	0.194	0.416	0.222	74
action175	0.1936	0.4231	0.2294	76
action297	0.1859	0.4198	0.2338	77
action145	0.1851	0.4103	0.2252	78
action205	0.1848	0.4653	0.2805	79
action27	0.1834	0.4015	0.2181	80
action18	0.1826	0.4328	0.2503	81
action33	0.1812	0.4244	0.2432	82
action172	0.1777	0.4605	0.2828	83
action103	0.1771	0.3891	0.212	84
action6	0.1754	0.4985	0.3231	85
action54	0.1751	0.4439	0.2688	86
action179	0.1749	0.3962	0.2213	87
action88	0.1729	0.444	0.2711	88
action50	0.1728	0.4862	0.3133	89
action176	0.1672	0.4099	0.2426	90
action109	0.1645	0.4012	0.2367	91
action127	0.1616	0.4387	0.2771	92
action333	0.1578	0.4234	0.2656	93
action104	0.1578	0.38	0.2222	93
action28	0.157	0.3883	0.2313	95
action211	0.1545	0.4452	0.2907	96
action261	0.1539	0.396	0.2421	97
action337	0.1525	0.4064	0.2539	98
action329	0.1525	0.4576	0.3051	98
action37	0.1494	0.4158	0.2664	100
action67	0.1494	0.3777	0.2283	100
action73	0.1493	0.4024	0.2531	102
action215	0.1487	0.3996	0.2509	103
action180	0.1486	0.383	0.2345	104
action58	0.1462	0.4062	0.2599	105
action185	0.145	0.3903	0.2453	106
action245	0.1405	0.4431	0.3026	107
action143	0.137	0.3691	0.2321	108
action219	0.1348	0.3762	0.2413	109
action90	0.1335	0.461	0.3275	110
action212	0.1284	0.432	0.3037	111
action216	0.1275	0.3899	0.2624	112
action373	0.1259	0.4135	0.2876	113
action31	0.1255	0.3726	0.2471	114
action128	0.125	0.4188	0.2938	115
action149	0.1244	0.3811	0.2568	116
action94	0.1243	0.4105	0.2862	117
action77	0.1227	0.3958	0.2731	118
action46	0.1217	0.455	0.3333	119
action377	0.1196	0.3963	0.2767	120
action167	0.1191	0.4171	0.2979	121
action113	0.1159	0.3824	0.2665	122
action22	0.1156	0.3896	0.274	123
action1	0.1118	0.4705	0.3587	124
action144	0.1106	0.3559	0.2452	125
action68	0.1086	0.3572	0.2486	126
action220	0.1085	0.363	0.2545	127
action301	0.1067	0.3723	0.2656	128
action225	0.1049	0.3702	0.2653	129
action255	0.1038	0.3764	0.2726	130
action369	0.1033	0.4337	0.3304	131
action98	0.1023	0.3794	0.2771	132
action32	0.0991	0.3594	0.2603	133
action183	0.0969	0.349	0.2521	134
action259	0.0947	0.3561	0.2614	135
action107	0.0947	0.3468	0.2521	135
action251	0.0918	0.4069	0.3151	137
action130	0.0912	0.4392	0.348	138
action285	0.0897	0.4172	0.3275	139
action256	0.0877	0.3699	0.2822	140
action168	0.087	0.4001	0.3132	141
action41	0.0862	0.4505	0.3643	142
action189	0.0843	0.3611	0.2768	143
action117	0.0795	0.3737	0.2942	144
action252	0.0779	0.4032	0.3253	145
action153	0.0758	0.3623	0.2865	146
action134	0.0748	0.3833	0.3084	147
action341	0.0733	0.359	0.2856	148
action184	0.0705	0.3358	0.2653	149
action86	0.0684	0.4185	0.3501	150
action260	0.0684	0.3429	0.2746	150
action265	0.0648	0.3502	0.2854	152
action108	0.0616	0.3301	0.2685	153
action62	0.061	0.3539	0.2928	154
action71	0.0607	0.3342	0.2735	155
action295	0.0591	0.3531	0.294	156
action138	0.0568	0.356	0.2992	157
action223	0.0568	0.329	0.2722	157
action81	0.054	0.4306	0.3765	159
action291	0.0525	0.3871	0.3346	160
action299	0.0487	0.3327	0.284	161
action147	0.0479	0.3233	0.2754	162
action207	0.0477	0.3783	0.3306	163
action229	0.0442	0.341	0.2969	164
action325	0.0441	0.3969	0.3528	165
action208	0.0437	0.378	0.3343	166
action72	0.0401	0.3238	0.2836	167
action381	0.0396	0.3488	0.3091	168
action292	0.0389	0.3836	0.3446	169
action35	0.0389	0.3354	0.2965	169
action193	0.0357	0.3423	0.3066	171
action296	0.0333	0.34	0.3068	172
action170	0.0305	0.4018	0.3712	173
action224	0.0304	0.3158	0.2853	174
action174	0.0301	0.3597	0.3297	175
action111	0.0273	0.3141	0.2869	176
action157	0.0253	0.3516	0.3263	177
action300	0.0224	0.3195	0.2972	178
action148	0.0215	0.3101	0.2885	179
action335	0.0207	0.3364	0.3157	180
action26	0.0199	0.3382	0.3183	181
action365	0.0194	0.3915	0.3721	182
action305	0.0183	0.3271	0.3088	183
action263	0.0167	0.3089	0.2922	184
action339	0.0153	0.3193	0.304	185
action121	0.0151	0.4107	0.3956	186
action102	0.0135	0.3258	0.3123	187
action36	0.0125	0.3222	0.3097	188
action39	0.0122	0.3288	0.3165	189
action75	0.0122	0.3154	0.3032	189
action178	0.0114	0.3329	0.3215	191
action187	0.0078	0.3032	0.2954	192
action269	0.0041	0.321	0.3169	193
action247	0.003	0.3559	0.3529	194
action112	0.0009	0.3009	0.3	195
action126	-0.0019	0.3754	0.3773	196
action233	-0.0044	0.3222	0.3266	197
action336	-0.0049	0.3234	0.3283	198
action210	-0.0091	0.3818	0.3909	199
action264	-0.0097	0.2957	0.3054	200
action375	-0.0105	0.3266	0.3371	201
action248	-0.011	0.3494	0.3604	202
action151	-0.0128	0.2941	0.3069	203
action331	-0.0128	0.3498	0.3626	203
action40	-0.0141	0.3156	0.3297	205
action66	-0.0142	0.3144	0.3286	206
action76	-0.0142	0.3022	0.3164	206
action79	-0.0145	0.3087	0.3232	208
action214	-0.0149	0.3363	0.3512	209
action345	-0.0151	0.3138	0.3289	210
action340	-0.017	0.3028	0.3198	211
action188	-0.0186	0.29	0.3086	212
action197	-0.0193	0.331	0.3504	213
action332	-0.0194	0.3506	0.37	214
action115	-0.0213	0.2953	0.3166	215
action379	-0.0235	0.3061	0.3296	216
action161	-0.0238	0.3909	0.4147	217
action3	-0.0254	0.3834	0.4088	218
action142	-0.0266	0.3057	0.3323	219
action218	-0.0287	0.3128	0.3416	220
action303	-0.0304	0.2853	0.3157	221
action227	-0.0323	0.2832	0.3155	222
action376	-0.0368	0.3135	0.3502	223
action30	-0.0381	0.3092	0.3474	224
action371	-0.0381	0.3436	0.3818	224
action152	-0.0392	0.2809	0.3201	226
action80	-0.0409	0.2955	0.3364	227
action287	-0.0411	0.3337	0.3748	228
action309	-0.0416	0.2988	0.3404	229
action385	-0.0418	0.3071	0.3489	230
action380	-0.0438	0.2961	0.3399	231
action166	-0.0444	0.3538	0.3982	232
action372	-0.0452	0.3443	0.3895	233
action116	-0.0476	0.2821	0.3298	234
action273	-0.0494	0.3011	0.3505	235
action304	-0.0497	0.2757	0.3254	236
action43	-0.051	0.3634	0.4145	237
action4	-0.0518	0.3702	0.422	238
action191	-0.0529	0.274	0.327	239
action119	-0.0577	0.2866	0.3443	240
action228	-0.0587	0.27	0.3286	241
action254	-0.0598	0.313	0.3728	242
action288	-0.0611	0.324	0.3851	243
action155	-0.0614	0.2753	0.3366	244
action201	-0.0626	0.3712	0.4337	245
action237	-0.0635	0.3105	0.374	246
action343	-0.0639	0.2719	0.3357	247
action182	-0.0667	0.2857	0.3524	248
action258	-0.0688	0.2928	0.3616	249
action106	-0.0689	0.2835	0.3524	250
action250	-0.0718	0.3435	0.4153	251
action327	-0.0721	0.3218	0.3939	252
action267	-0.0724	0.2631	0.3355	253
action349	-0.075	0.2855	0.3604	254
action44	-0.0774	0.3502	0.4277	255
action192	-0.0793	0.2608	0.3401	256
action344	-0.0831	0.2623	0.3454	257
action83	-0.0832	0.3435	0.4267	258
action120	-0.0841	0.2734	0.3575	259
action328	-0.0862	0.3152	0.4014	260
action156	-0.0877	0.2621	0.3498	261
action231	-0.093	0.254	0.347	262
action313	-0.0943	0.2801	0.3744	263
action383	-0.0976	0.2617	0.3593	264
action195	-0.1015	0.2552	0.3567	265
action241	-0.1016	0.3515	0.453	266
action389	-0.1017	0.2788	0.3805	267
action70	-0.1029	0.2709	0.3737	268
action294	-0.1045	0.2898	0.3942	269
action268	-0.1051	0.2469	0.3521	270
action222	-0.1068	0.2656	0.3724	271
action159	-0.1073	0.2651	0.3724	272
action277	-0.1075	0.2901	0.3976	273
action84	-0.1095	0.3303	0.4399	274
action384	-0.1098	0.2557	0.3655	275
action367	-0.1101	0.3089	0.419	276
action290	-0.111	0.3238	0.4348	277
action307	-0.1125	0.2431	0.3556	278
action298	-0.1149	0.2694	0.3843	279
action146	-0.1156	0.26	0.3756	280
action206	-0.1159	0.315	0.4309	281
action232	-0.1194	0.2408	0.3602	282
action123	-0.1221	0.3236	0.4458	283
action34	-0.1247	0.2721	0.3968	284
action353	-0.1278	0.2667	0.3945	285
action196	-0.1278	0.242	0.3699	285
action160	-0.129	0.2526	0.3816	287
action368	-0.1308	0.2988	0.4297	288
action271	-0.1331	0.2339	0.3671	289
action110	-0.1363	0.2508	0.3871	290
action281	-0.1404	0.3319	0.4722	291
action235	-0.1416	0.2352	0.3767	292
action334	-0.1429	0.2731	0.4159	293
action308	-0.1452	0.2269	0.3721	294
action347	-0.1459	0.2297	0.3756	295
action262	-0.1469	0.2456	0.3925	296
action317	-0.1476	0.27	0.4176	297
action338	-0.1482	0.256	0.4043	298
action124	-0.1485	0.3104	0.459	299
action38	-0.1513	0.2655	0.4168	300
action74	-0.1514	0.2521	0.4035	301
action186	-0.1557	0.2399	0.3957	302
action199	-0.1565	0.244	0.4005	303
action272	-0.1595	0.2207	0.3802	304
action246	-0.1605	0.2926	0.4531	305
action163	-0.1609	0.3038	0.4648	306
action393	-0.164	0.2586	0.4226	307
action321	-0.1726	0.3189	0.4916	308
action236	-0.1729	0.2209	0.3937	309
action311	-0.1732	0.2139	0.3871	310
action374	-0.174	0.2633	0.4373	311
action150	-0.1764	0.2308	0.4072	312
action330	-0.1764	0.2865	0.4629	312
action78	-0.1781	0.2454	0.4235	314
action200	-0.1784	0.2313	0.4097	315
action348	-0.1786	0.2135	0.3922	316
action387	-0.179	0.22	0.399	317
action357	-0.181	0.2567	0.4377	318
action275	-0.1817	0.2151	0.3968	319
action114	-0.1848	0.232	0.4168	320
action378	-0.187	0.2428	0.4298	321
action164	-0.1873	0.2906	0.478	322
action2	-0.189	0.3201	0.5091	323
action302	-0.194	0.2219	0.4159	324
action226	-0.1958	0.2199	0.4157	325
action361	-0.1981	0.3128	0.5109	326
action312	-0.1996	0.2007	0.4003	327
action203	-0.1998	0.2841	0.4839	328
action370	-0.2017	0.2803	0.482	329
action239	-0.2046	0.2231	0.4276	330
action286	-0.2047	0.2704	0.4751	331
action388	-0.2054	0.2068	0.4122	332
action397	-0.2077	0.25	0.4577	333
action351	-0.2122	0.1984	0.4106	334
action276	-0.213	0.2008	0.4138	335
action42	-0.2146	0.3001	0.5147	336
action190	-0.2165	0.2107	0.4272	337
action240	-0.2185	0.2113	0.4297	338
action118	-0.2213	0.2233	0.4446	339
action154	-0.2249	0.212	0.4369	340
action204	-0.2261	0.2709	0.4971	341
action315	-0.2267	0.194	0.4206	342
action342	-0.2274	0.2086	0.436	343
action352	-0.233	0.1873	0.4203	344
action326	-0.2357	0.2585	0.4942	345
action266	-0.2359	0.1998	0.4358	346
action243	-0.2387	0.2644	0.5031	347
action391	-0.2389	0.1917	0.4306	348
action279	-0.2447	0.203	0.4477	349
action82	-0.2467	0.2802	0.5269	350
action316	-0.2531	0.1808	0.4338	351
action230	-0.2566	0.1907	0.4473	352
action382	-0.2611	0.1984	0.4595	353
action355	-0.2649	0.1797	0.4446	354
action194	-0.265	0.1919	0.4569	355
action244	-0.2651	0.2512	0.5163	356
action392	-0.2653	0.1785	0.4438	357
action280	-0.2671	0.1902	0.4574	358
action158	-0.2709	0.2018	0.4727	359
action366	-0.2736	0.2456	0.5192	360
action306	-0.276	0.1798	0.4558	361
action283	-0.2775	0.2448	0.5223	362
action319	-0.2848	0.183	0.4677	363
action122	-0.2857	0.2603	0.546	364
action356	-0.2865	0.1674	0.4539	365
action395	-0.2965	0.1722	0.4687	366
action270	-0.2967	0.1706	0.4673	367
action284	-0.3039	0.2316	0.5355	368
action234	-0.3051	0.1719	0.477	369
action320	-0.3072	0.1702	0.4774	370
action346	-0.3095	0.1664	0.4759	371
action323	-0.3098	0.2319	0.5417	372
action396	-0.3132	0.1607	0.4739	373
action359	-0.3182	0.1696	0.4878	374
action198	-0.3201	0.1807	0.5007	375
action162	-0.3245	0.2405	0.565	376
action363	-0.3353	0.2258	0.5611	377
action324	-0.3362	0.2187	0.5549	378
action310	-0.3368	0.1506	0.4874	379
action386	-0.3426	0.1567	0.4993	380
action360	-0.3446	0.1564	0.501	381
action399	-0.3449	0.1629	0.5078	382
action274	-0.3452	0.1518	0.497	383
action364	-0.3617	0.2126	0.5742	384
action202	-0.3633	0.2208	0.5841	385
action238	-0.3681	0.1598	0.5279	386
action400	-0.3713	0.1497	0.521	387
action350	-0.3757	0.1351	0.5108	388
action314	-0.3903	0.1306	0.5209	389
action242	-0.4023	0.2011	0.6034	390
action390	-0.4025	0.1284	0.5309	391
action278	-0.4082	0.1397	0.5479	392
action354	-0.4285	0.1163	0.5448	393
action282	-0.4411	0.1815	0.6226	394
action318	-0.4483	0.1197	0.568	395
action394	-0.46	0.1089	0.5689	396
action322	-0.4734	0.1686	0.642	397
action358	-0.4817	0.1063	0.588	398
action362	-0.4988	0.1625	0.6613	399
action398	-0.5085	0.0996	0.6081	400

## Sheet: syn-vshape-equal-ranking
A	Phi	Phi+	Phi-	Rank	SF	PP	Measure	Last Iter.	Coverage	Coverage
A9	0.5106	0.6656	0.155	1	0.01	0.2	degree	10.4	58.37	0.5837
A13	0.5103	0.6205	0.1102	2	0.01	0.3	degree	7.9	81.13	0.8113
A17	0.4833	0.5832	0.0999	3	0.01	0.4	degree	7	91.83	0.9183
A5	0.4762	0.6489	0.1727	4	0.01	0.1	degree	9.7	16.89	0.1689
A53	0.4758	0.5943	0.1185	5	0.02	0.3	degree	7.7	81.13	0.8113
A49	0.4736	0.6365	0.1629	6	0.02	0.2	degree	9.3	58.52	0.5852
A57	0.447	0.5566	0.1096	7	0.02	0.4	degree	6.8	91.83	0.9183
A89	0.4361	0.613	0.1768	8	0.03	0.2	degree	9	58.83	0.5883
A21	0.4226	0.5433	0.1207	9	0.01	0.5	degree	6.2	96.95	0.9695
A45	0.4225	0.6054	0.183	10	0.02	0.1	degree	8.2	20.18	0.2018

## Sheet: syn-linear-uncertainty
Scenario	Scenario1
Evaluations	Seeding Fraction	Average PP	Measure	Average Last Iteration	Average Coverage
action1	0.01	0.01	0.006	1	1.05
action2	0.01	0.01	0.011	1	1.05
action3	0.01	0.01	0.0085	1	1.05
action4	0.01	0.01	0.009	1	1.05
action5	0.01	0.1	0.006	9.7	16.89
action6	0.01	0.1	0.011	9.7	16.9
action7	0.01	0.1	0.0085	9.7	16.9
action8	0.01	0.1	0.009	9.3	16.6
action9	0.01	0.2	0.006	10.4	58.37
action10	0.01	0.2	0.011	10.4	58.37
action11	0.01	0.2	0.0085	10.4	58.37
action12	0.01	0.2	0.009	10.2	58.37
action13	0.01	0.3	0.006	7.9	81.13
action14	0.01	0.3	0.011	7.8	81.13
action15	0.01	0.3	0.0085	7.8	81.13
action16	0.01	0.3	0.009	8.1	81.13
action17	0.01	0.4	0.006	7	91.83
action18	0.01	0.4	0.011	7	91.83
action19	0.01	0.4	0.0085	7	91.83
action20	0.01	0.4	0.009	7	91.83
action21	0.01	0.5	0.006	6.2	96.95
action22	0.01	0.5	0.011	6.1	96.95
action23	0.01	0.5	0.0085	6.1	96.95
action24	0.01	0.5	0.009	6.1	96.95
action25	0.01	0.6	0.006	5.2	98.73
action26	0.01	0.6	0.011	5.2	98.73
action27	0.01	0.6	0.0085	5.2	98.73
action28	0.01	0.6	0.009	5.2	98.73
action29	0.01	0.7	0.006	4.9	99.62
action30	0.01	0.7	0.011	4.9	99.62
action31	0.01	0.7	0.0085	4.9	99.62
action32	0.01	0.7	0.009	4.9	99.62
action33	0.01	0.8	0.006	4.1	99.93
action34	0.01	0.8	0.011	4	99.93
action35	0.01	0.8	0.0085	4	99.93
action36	0.01	0.8	0.009	4	99.93
action37	0.01	0.9	0.006	4	100
action38	0.01	0.9	0.011	4	100
action39	0.01	0.9	0.0085	4	100
action40	0.01	0.9	0.009	4	100
action41	0.02	0.01	0.006	1	1.97
action42	0.02	0.01	0.011	1	1.97
action43	0.02	0.01	0.0085	1	1.97
action44	0.02	0.01	0.009	1	1.97
action45	0.02	0.1	0.006	8.2	20.18
action46	0.02	0.1	0.011	8.2	20.18
action47	0.02	0.1	0.0085	8.2	20.18
action48	0.02	0.1	0.009	8.9	19.55
action49	0.02	0.2	0.006	9.3	58.52
action50	0.02	0.2	0.011	9.3	58.52
action51	0.02	0.2	0.0085	9.3	58.52
action52	0.02	0.2	0.009	9.8	58.37
action53	0.02	0.3	0.006	7.7	81.13
action54	0.02	0.3	0.011	7.7	81.13
action55	0.02	0.3	0.0085	7.7	81.13
action56	0.02	0.3	0.009	7.6	81.13
action57	0.02	0.4	0.006	6.8	91.83
action58	0.02	0.4	0.011	6.8	91.83
action59	0.02	0.4	0.0085	6.8	91.83
action60	0.02	0.4	0.009	6.8	91.83
action61	0.02	0.5	0.006	5.7	96.95
action62	0.02	0.5	0.011	5.7	96.95
action63	0.02	0.5	0.0085	5.7	96.95
action64	0.02	0.5	0.009	5.8	96.95
action65	0.02	0.6	0.006	5.1	98.73
action66	0.02	0.6	0.011	5.1	98.73
action67	0.02	0.6	0.0085	5.1	98.73
action68	0.02	0.6	0.009	4.9	98.73
action69	0.02	0.7	0.006	4.3	99.62
action70	0.02	0.7	0.011	4.3	99.62
action71	0.02	0.7	0.0085	4.3	99.62
action72	0.02	0.7	0.009	4.4	99.62
action73	0.02	0.8	0.006	4	99.93
action74	0.02	0.8	0.011	4	99.93
action75	0.02	0.8	0.0085	4	99.93
action76	0.02	0.8	0.009	4	99.93
action77	0.02	0.9	0.006	4	100
action78	0.02	0.9	0.011	4	100
action79	0.02	0.9	0.0085	4	100
action80	0.02	0.9	0.009	4	100
action81	0.03	0.01	0.006	1	3.02
action82	0.03	0.01	0.011	1	3.02
action83	0.03	0.01	0.0085	1	3.02
action84	0.03	0.01	0.009	1	3.02
action85	0.03	0.1	0.006	7.7	22.26
action86	0.03	0.1	0.011	7.6	22.47
action87	0.03	0.1	0.0085	7.6	22.47
action88	0.03	0.1	0.009	6.9	22.1
action89	0.03	0.2	0.006	9	58.83
action90	0.03	0.2	0.011	8.9	58.83
action91	0.03	0.2	0.0085	8.9	58.83
action92	0.03	0.2	0.009	9	58.58
action93	0.03	0.3	0.006	7.1	81.13
action94	0.03	0.3	0.011	7.3	81.13
action95	0.03	0.3	0.0085	7.3	81.13
action96	0.03	0.3	0.009	7.5	81.13
action97	0.03	0.4	0.006	6.5	91.83
action98	0.03	0.4	0.011	6.6	91.83
action99	0.03	0.4	0.0085	6.6	91.83
action100	0.03	0.4	0.009	6.7	91.83
action101	0.03	0.5	0.006	5.5	96.95
action102	0.03	0.5	0.011	5.5	96.95
action103	0.03	0.5	0.0085	5.5	96.95
action104	0.03	0.5	0.009	5.6	96.95
action105	0.03	0.6	0.006	4.9	98.73
action106	0.03	0.6	0.011	4.8	98.73
action107	0.03	0.6	0.0085	4.8	98.73
action108	0.03	0.6	0.009	4.7	98.73
action109	0.03	0.7	0.006	4.3	99.62
action110	0.03	0.7	0.011	4.3	99.62
action111	0.03	0.7	0.0085	4.3	99.62
action112	0.03	0.7	0.009	4.3	99.62
action113	0.03	0.8	0.006	4	99.93
action114	0.03	0.8	0.011	4	99.93
action115	0.03	0.8	0.0085	4	99.93
action116	0.03	0.8	0.009	4	99.93
action117	0.03	0.9	0.006	3.8	100
action118	0.03	0.9	0.011	3.8	100
action119	0.03	0.9	0.0085	3.8	100
action120	0.03	0.9	0.009	3.8	100
action121	0.04	0.01	0.006	1	3.94
action122	0.04	0.01	0.011	1	3.94
action123	0.04	0.01	0.0085	1	3.94
action124	0.04	0.01	0.009	1	3.94
action125	0.04	0.1	0.006	6.9	24.82
action126	0.04	0.1	0.011	6.9	24.11
action127	0.04	0.1	0.0085	6.9	24.11
action128	0.04	0.1	0.009	6.7	23.88
action129	0.04	0.2	0.006	8.6	58.83
action130	0.04	0.2	0.011	8.8	58.84
action131	0.04	0.2	0.0085	8.8	58.84
action132	0.04	0.2	0.009	8.9	58.83
action133	0.04	0.3	0.006	7.1	81.13
action134	0.04	0.3	0.011	7.1	81.13
action135	0.04	0.3	0.0085	7.1	81.13
action136	0.04	0.3	0.009	7.1	81.13
action137	0.04	0.4	0.006	6.5	91.83
action138	0.04	0.4	0.011	6.5	91.83
action139	0.04	0.4	0.0085	6.5	91.83
action140	0.04	0.4	0.009	6.5	91.83
action141	0.04	0.5	0.006	5.5	96.95
action142	0.04	0.5	0.011	5.5	96.95
action143	0.04	0.5	0.0085	5.5	96.95
action144	0.04	0.5	0.009	5.5	96.95
action145	0.04	0.6	0.006	4.7	98.73
action146	0.04	0.6	0.011	4.7	98.73
action147	0.04	0.6	0.0085	4.7	98.73
action148	0.04	0.6	0.009	4.7	98.73
action149	0.04	0.7	0.006	4.3	99.62
action150	0.04	0.7	0.011	4.3	99.62
action151	0.04	0.7	0.0085	4.3	99.62
action152	0.04	0.7	0.009	4.3	99.62
action153	0.04	0.8	0.006	4	99.93
action154	0.04	0.8	0.011	4	99.93
action155	0.04	0.8	0.0085	4	99.93
action156	0.04	0.8	0.009	4	99.93
action157	0.04	0.9	0.006	3.5	100
action158	0.04	0.9	0.011	3.6	100
action159	0.04	0.9	0.0085	3.6	100
action160	0.04	0.9	0.009	3.7	100
action161	0.05	0.01	0.006	1	4.99
action162	0.05	0.01	0.011	1	4.99
action163	0.05	0.01	0.0085	1	4.99
action164	0.05	0.01	0.009	1	4.99
action165	0.05	0.1	0.006	6.4	25.97
action166	0.05	0.1	0.011	6.8	26.04
action167	0.05	0.1	0.0085	6.8	26.04
action168	0.05	0.1	0.009	6.7	25.57
action169	0.05	0.2	0.006	8.1	59.22
action170	0.05	0.2	0.011	8.1	59.12
action171	0.05	0.2	0.0085	8.1	59.12
action172	0.05	0.2	0.009	8.4	58.99
action173	0.05	0.3	0.006	7	81.13
action174	0.05	0.3	0.011	7	81.13
action175	0.05	0.3	0.0085	7	81.13
action176	0.05	0.3	0.009	7	81.13
action177	0.05	0.4	0.006	6.4	91.83
action178	0.05	0.4	0.011	6.4	91.83
action179	0.05	0.4	0.0085	6.4	91.83
action180	0.05	0.4	0.009	6.4	91.83
action181	0.05	0.5	0.006	5.5	96.95
action182	0.05	0.5	0.011	5.5	96.95
action183	0.05	0.5	0.0085	5.5	96.95
action184	0.05	0.5	0.009	5.5	96.95
action185	0.05	0.6	0.006	4.7	98.73
action186	0.05	0.6	0.011	4.7	98.73
action187	0.05	0.6	0.0085	4.7	98.73
action188	0.05	0.6	0.009	4.7	98.73
action189	0.05	0.7	0.006	4.3	99.62
action190	0.05	0.7	0.011	4.3	99.62
action191	0.05	0.7	0.0085	4.3	99.62
action192	0.05	0.7	0.009	4.3	99.62
action193	0.05	0.8	0.006	4	99.93
action194	0.05	0.8	0.011	4	99.93
action195	0.05	0.8	0.0085	4	99.93
action196	0.05	0.8	0.009	4	99.93
action197	0.05	0.9	0.006	3.4	100
action198	0.05	0.9	0.011	3.4	100
action199	0.05	0.9	0.0085	3.4	100
action200	0.05	0.9	0.009	3.5	100
action201	0.06	0.01	0.006	1	6.04
action202	0.06	0.01	0.011	1	6.04
action203	0.06	0.01	0.0085	1	6.04
action204	0.06	0.01	0.009	1	6.04
action205	0.06	0.1	0.006	6.2	27.32
action206	0.06	0.1	0.011	6.2	27.32
action207	0.06	0.1	0.0085	6.2	27.32
action208	0.06	0.1	0.009	6.6	27.03
action209	0.06	0.2	0.006	8.1	59.5
action210	0.06	0.2	0.011	8.1	59.36
action211	0.06	0.2	0.0085	8.1	59.36
action212	0.06	0.2	0.009	8.1	59.47
action213	0.06	0.3	0.006	6.9	81.17
action214	0.06	0.3	0.011	6.9	81.13
action215	0.06	0.3	0.0085	6.9	81.13
action216	0.06	0.3	0.009	7	81.2
action217	0.06	0.4	0.006	6.4	91.83
action218	0.06	0.4	0.011	6.4	91.83
action219	0.06	0.4	0.0085	6.4	91.83
action220	0.06	0.4	0.009	6.4	91.83
action221	0.06	0.5	0.006	5.5	96.95
action222	0.06	0.5	0.011	5.5	96.95
action223	0.06	0.5	0.0085	5.5	96.95
action224	0.06	0.5	0.009	5.5	96.95
action225	0.06	0.6	0.006	4.7	98.73
action226	0.06	0.6	0.011	4.7	98.73
action227	0.06	0.6	0.0085	4.7	98.73
action228	0.06	0.6	0.009	4.7	98.73
action229	0.06	0.7	0.006	4.3	99.62
action230	0.06	0.7	0.011	4.3	99.62
action231	0.06	0.7	0.0085	4.3	99.62
action232	0.06	0.7	0.009	4.3	99.62
action233	0.06	0.8	0.006	4	99.93
action234	0.06	0.8	0.011	4	99.93
action235	0.06	0.8	0.0085	4	99.93
action236	0.06	0.8	0.009	3.9	99.93
action237	0.06	0.9	0.006	3.3	100
action238	0.06	0.9	0.011	3.2	100
action239	0.06	0.9	0.0085	3.2	100
action240	0.06	0.9	0.009	3.5	100
action241	0.07	0.01	0.006	1	6.96
action242	0.07	0.01	0.011	1	6.96
action243	0.07	0.01	0.0085	1	6.96
action244	0.07	0.01	0.009	1	6.96
action245	0.07	0.1	0.006	6.1	28.44
action246	0.07	0.1	0.011	6.1	28.29
action247	0.07	0.1	0.0085	6.1	28.29
action248	0.07	0.1	0.009	6.3	28.27
action249	0.07	0.2	0.006	8.1	59.87
action250	0.07	0.2	0.011	7.5	59.72
action251	0.07	0.2	0.0085	7.5	59.72
action252	0.07	0.2	0.009	7.8	59.88
action253	0.07	0.3	0.006	6.8	81.24
action254	0.07	0.3	0.011	6.8	81.13
action255	0.07	0.3	0.0085	6.8	81.13
action256	0.07	0.3	0.009	7	81.26
action257	0.07	0.4	0.006	6.4	91.83
action258	0.07	0.4	0.011	6.4	91.83
action259	0.07	0.4	0.0085	6.4	91.83
action260	0.07	0.4	0.009	6.4	91.83
action261	0.07	0.5	0.006	5.5	96.95
action262	0.07	0.5	0.011	5.5	96.95
action263	0.07	0.5	0.0085	5.5	96.95
action264	0.07	0.5	0.009	5.5	96.95
action265	0.07	0.6	0.006	4.7	98.73
action266	0.07	0.6	0.011	4.7	98.73
action267	0.07	0.6	0.0085	4.7	98.73
action268	0.07	0.6	0.009	4.6	98.73
action269	0.07	0.7	0.006	4.3	99.62
action270	0.07	0.7	0.011	4.3	99.62
action271	0.07	0.7	0.0085	4.3	99.62
action272	0.07	0.7	0.009	4.3	99.62
action273	0.07	0.8	0.006	3.9	99.93
action274	0.07	0.8	0.011	4	99.93
action275	0.07	0.8	0.0085	4	99.93
action276	0.07	0.8	0.009	3.9	99.93
action277	0.07	0.9	0.006	3.2	100
action278	0.07	0.9	0.011	3.2	100
action279	0.07	0.9	0.0085	3.2	100
action280	0.07	0.9	0.009	3.3	100
action281	0.08	0.01	0.006	1	8.02
action282	0.08	0.01	0.011	1	8.02
action283	0.08	0.01	0.0085	1	8.02
action284	0.08	0.01	0.009	1	8.02
action285	0.08	0.1	0.006	5.9	30.08
action286	0.08	0.1	0.011	6	29.8
action287	0.08	0.1	0.0085	6	29.8
action288	0.08	0.1	0.009	6.1	29.58
action289	0.08	0.2	0.006	7.8	60.33
action290	0.08	0.2	0.011	7.5	60.13
action291	0.08	0.2	0.0085	7.5	60.13
action292	0.08	0.2	0.009	7.8	60.42
action293	0.08	0.3	0.006	6.8	81.3
action294	0.08	0.3	0.011	6.7	81.24
action295	0.08	0.3	0.0085	6.7	81.24
action296	0.08	0.3	0.009	6.7	81.35
action297	0.08	0.4	0.006	6.3	91.84
action298	0.08	0.4	0.011	6.3	91.83
action299	0.08	0.4	0.0085	6.3	91.83
action300	0.08	0.4	0.009	6.3	91.84
action301	0.08	0.5	0.006	5.4	96.95
action302	0.08	0.5	0.011	5.4	96.95
action303	0.08	0.5	0.0085	5.4	96.95
action304	0.08	0.5	0.009	5.5	96.96
action305	0.08	0.6	0.006	4.6	98.73
action306	0.08	0.6	0.011	4.7	98.73
action307	0.08	0.6	0.0085	4.7	98.73
action308	0.08	0.6	0.009	4.6	98.73
action309	0.08	0.7	0.006	4.2	99.62
action310	0.08	0.7	0.011	4.3	99.62
action311	0.08	0.7	0.0085	4.3	99.62
action312	0.08	0.7	0.009	4.3	99.62
action313	0.08	0.8	0.006	3.8	99.93
action314	0.08	0.8	0.011	3.9	99.93
action315	0.08	0.8	0.0085	3.9	99.93
action316	0.08	0.8	0.009	3.9	99.93
action317	0.08	0.9	0.006	3.2	100
action318	0.08	0.9	0.011	3.2	100
action319	0.08	0.9	0.0085	3.2	100
action320	0.08	0.9	0.009	3.3	100
action321	0.09	0.01	0.006	1	8.94
action322	0.09	0.01	0.011	1	8.94
action323	0.09	0.01	0.0085	1	8.94
action324	0.09	0.01	0.009	1	8.94
action325	0.09	0.1	0.006	5.7	31.16
action326	0.09	0.1	0.011	6	31.12
action327	0.09	0.1	0.0085	6	31.12
action328	0.09	0.1	0.009	6.2	30.72
action329	0.09	0.2	0.006	7.4	60.47
action330	0.09	0.2	0.011	6.8	60.51
action331	0.09	0.2	0.0085	6.8	60.51
action332	0.09	0.2	0.009	7.2	60.95
action333	0.09	0.3	0.006	6.6	81.3
action334	0.09	0.3	0.011	6.6	81.31
action335	0.09	0.3	0.0085	6.6	81.31
action336	0.09	0.3	0.009	6.6	81.48
action337	0.09	0.4	0.006	6.3	91.84
action338	0.09	0.4	0.011	6.3	91.84
action339	0.09	0.4	0.0085	6.3	91.84
action340	0.09	0.4	0.009	6.2	91.88
action341	0.09	0.5	0.006	5.4	96.95
action342	0.09	0.5	0.011	5.4	96.95
action343	0.09	0.5	0.0085	5.4	96.95
action344	0.09	0.5	0.009	5.5	96.98
action345	0.09	0.6	0.006	4.6	98.73
action346	0.09	0.6	0.011	4.7	98.73
action347	0.09	0.6	0.0085	4.7	98.73
action348	0.09	0.6	0.009	4.6	98.73
action349	0.09	0.7	0.006	4.2	99.62
action350	0.09	0.7	0.011	4.2	99.62
action351	0.09	0.7	0.0085	4.2	99.62
action352	0.09	0.7	0.009	4.3	99.62
action353	0.09	0.8	0.006	3.8	99.93
action354	0.09	0.8	0.011	3.8	99.93
action355	0.09	0.8	0.0085	3.8	99.93
action356	0.09	0.8	0.009	3.9	99.93
action357	0.09	0.9	0.006	3.2	100
action358	0.09	0.9	0.011	3.2	100
action359	0.09	0.9	0.0085	3.2	100
action360	0.09	0.9	0.009	3.2	100
action361	0.1	0.01	0.006	1	9.99
action362	0.1	0.01	0.011	1	9.99
action363	0.1	0.01	0.0085	1	9.99
action364	0.1	0.01	0.009	1	9.99
action365	0.1	0.1	0.006	5.7	32.27
action366	0.1	0.1	0.011	5.8	32.59
action367	0.1	0.1	0.0085	5.8	32.59
action368	0.1	0.1	0.009	5.9	31.81
action369	0.1	0.2	0.006	6.9	60.95
action370	0.1	0.2	0.011	6.8	61.21
action371	0.1	0.2	0.0085	6.8	61.21
action372	0.1	0.2	0.009	7.2	61.38
action373	0.1	0.3	0.006	6.5	81.34
action374	0.1	0.3	0.011	6.5	81.51
action375	0.1	0.3	0.0085	6.5	81.51
action376	0.1	0.3	0.009	6.5	81.52
action377	0.1	0.4	0.006	6.2	91.84
action378	0.1	0.4	0.011	6.1	91.91
action379	0.1	0.4	0.0085	6.1	91.91
action380	0.1	0.4	0.009	6.2	91.88
action381	0.1	0.5	0.006	5.3	96.95
action382	0.1	0.5	0.011	5.3	96.95
action383	0.1	0.5	0.0085	5.3	96.95
action384	0.1	0.5	0.009	5.5	96.98
action385	0.1	0.6	0.006	4.6	98.73
action386	0.1	0.6	0.011	4.6	98.73
action387	0.1	0.6	0.0085	4.6	98.73
action388	0.1	0.6	0.009	4.6	98.73
action389	0.1	0.7	0.006	4.2	99.62
action390	0.1	0.7	0.011	4.2	99.62
action391	0.1	0.7	0.0085	4.2	99.62
action392	0.1	0.7	0.009	4.2	99.62
action393	0.1	0.8	0.006	3.6	99.93
action394	0.1	0.8	0.011	3.7	99.93
action395	0.1	0.8	0.0085	3.7	99.93
action396	0.1	0.8	0.009	3.9	99.93
action397	0.1	0.9	0.006	3.2	100
action398	0.1	0.9	0.011	3.2	100
action399	0.1	0.9	0.0085	3.2	100
action400	0.1	0.9	0.009	3.2	100
Preferences	Seeding Fraction	Average PP	Measure	Average Last Iteration	Average Coverage
active	yes	yes	yes	yes	yes
Min/Max	min	min	min	max	max
Weight	1	1	1	1	1
Preference function	Linear	Linear	Linear	Linear	Linear
Thresholds	absolute	absolute	absolute	absolute	absolute
q	0.015	0.145	0.0009	1.045	16.38
p	0.03	0.29	0.0019	2.09	32.76
s	3	3	3	3	3
Unicriterion flows	Seeding Fraction	Average PP	Measure	Average Last Iteration	Average Coverage
action1	0.7352	0.7329	0.7519	-0.9023	-0.8536
action2	0.7352	0.7329	-0.7519	-0.9023	-0.8536
action3	0.7352	0.7329	0	-0.9023	-0.8536
action4	0.7352	0.7329	0	-0.9023	-0.8536
action5	0.7352	0.6395	0.7519	0.9295	-0.802
action6	0.7352	0.6395	-0.7519	0.9295	-0.802
action7	0.7352	0.6395	0	0.9295	-0.802
action8	0.7352	0.6395	0	0.9	-0.802
action9	0.7352	0.5082	0.7519	0.9607	-0.4534
action10	0.7352	0.5082	-0.7519	0.9607	-0.4534
action11	0.7352	0.5082	0	0.9607	-0.4534
action12	0.7352	0.5082	0	0.9548	-0.4534
action13	0.7352	0.3008	0.7519	0.6628	0.1823
action14	0.7352	0.3008	-0.7519	0.6416	0.1823
action15	0.7352	0.3008	0	0.6416	0.1823
action16	0.7352	0.3008	0	0.709	0.1823
action17	0.7352	0.1003	0.7519	0.4881	0.2971
action18	0.7352	0.1003	-0.7519	0.4881	0.2971
action19	0.7352	0.1003	0	0.4881	0.2971
action20	0.7352	0.1003	0	0.4881	0.2971
action21	0.7352	-0.1003	0.7519	0.3165	0.3008
action22	0.7352	-0.1003	-0.7519	0.2903	0.3008
action23	0.7352	-0.1003	0	0.2903	0.3008
action24	0.7352	-0.1003	0	0.2903	0.3008
action25	0.7352	-0.3008	0.7519	-0.0417	0.3077
action26	0.7352	-0.3008	-0.7519	-0.0417	0.3077
action27	0.7352	-0.3008	0	-0.0417	0.3077
action28	0.7352	-0.3008	0	-0.0417	0.3077
action29	0.7352	-0.5013	0.7519	-0.1519	0.3132
action30	0.7352	-0.5013	-0.7519	-0.1519	0.3132
action31	0.7352	-0.5013	0	-0.1519	0.3132
action32	0.7352	-0.5013	0	-0.1519	0.3132
action33	0.7352	-0.6395	0.7519	-0.3321	0.3151
action34	0.7352	-0.6395	-0.7519	-0.3464	0.3151
action35	0.7352	-0.6395	0	-0.3464	0.3151
action36	0.7352	-0.6395	0	-0.3464	0.3151
action37	0.7352	-0.7398	0.7519	-0.3464	0.3155
action38	0.7352	-0.7398	-0.7519	-0.3464	0.3155
action39	0.7352	-0.7398	0	-0.3464	0.3155
action40	0.7352	-0.7398	0	-0.3464	0.3155
action41	0.6349	0.7329	0.7519	-0.9023	-0.8486
action42	0.6349	0.7329	-0.7519	-0.9023	-0.8486
action43	0.6349	0.7329	0	-0.9023	-0.8486
action44	0.6349	0.7329	0	-0.9023	-0.8486
action45	0.6349	0.6395	0.7519	0.7336	-0.7987
action46	0.6349	0.6395	-0.7519	0.7336	-0.7987
action47	0.6349	0.6395	0	0.7336	-0.7987
action48	0.6349	0.6395	0	0.8611	-0.7999
action49	0.6349	0.5082	0.7519	0.9	-0.4519
action50	0.6349	0.5082	-0.7519	0.9	-0.4519
action51	0.6349	0.5082	0	0.9	-0.4519
action52	0.6349	0.5082	0	0.9351	-0.4534
action53	0.6349	0.3008	0.7519	0.621	0.1823
action54	0.6349	0.3008	-0.7519	0.621	0.1823
action55	0.6349	0.3008	0	0.621	0.1823
action56	0.6349	0.3008	0	0.6017	0.1823
action57	0.6349	0.1003	0.7519	0.4524	0.2971
action58	0.6349	0.1003	-0.7519	0.4524	0.2971
action59	0.6349	0.1003	0	0.4524	0.2971
action60	0.6349	0.1003	0	0.4524	0.2971
action61	0.6349	-0.1003	0.7519	0.1471	0.3008
action62	0.6349	-0.1003	-0.7519	0.1471	0.3008
action63	0.6349	-0.1003	0	0.1471	0.3008
action64	0.6349	-0.1003	0	0.1854	0.3008
action65	0.6349	-0.3008	0.7519	-0.0814	0.3077
action66	0.6349	-0.3008	-0.7519	-0.0814	0.3077
action67	0.6349	-0.3008	0	-0.0814	0.3077
action68	0.6349	-0.3008	0	-0.1519	0.3077
action69	0.6349	-0.5013	0.7519	-0.298	0.3132
action70	0.6349	-0.5013	-0.7519	-0.298	0.3132
action71	0.6349	-0.5013	0	-0.298	0.3132
action72	0.6349	-0.5013	0	-0.2753	0.3132
action73	0.6349	-0.6395	0.7519	-0.3464	0.3151
action74	0.6349	-0.6395	-0.7519	-0.3464	0.3151
action75	0.6349	-0.6395	0	-0.3464	0.3151
action76	0.6349	-0.6395	0	-0.3464	0.3151
action77	0.6349	-0.7398	0.7519	-0.3464	0.3155
action78	0.6349	-0.7398	-0.7519	-0.3464	0.3155
action79	0.6349	-0.7398	0	-0.3464	0.3155
action80	0.6349	-0.7398	0	-0.3464	0.3155
action81	0.5013	0.7329	0.7519	-0.9023	-0.8428
action82	0.5013	0.7329	-0.7519	-0.9023	-0.8428
action83	0.5013	0.7329	0	-0.9023	-0.8428
action84	0.5013	0.7329	0	-0.9023	-0.8428
action85	0.5013	0.6395	0.7519	0.621	-0.7932
action86	0.5013	0.6395	-0.7519	0.6017	-0.7925
action87	0.5013	0.6395	0	0.6017	-0.7925
action88	0.5013	0.6395	0	0.4701	-0.7937
action89	0.5013	0.5082	0.7519	0.8728	-0.449
action90	0.5013	0.5082	-0.7519	0.8611	-0.449
action91	0.5013	0.5082	0	0.8611	-0.449
action92	0.5013	0.5082	0	0.8728	-0.4514
action93	0.5013	0.3008	0.7519	0.5047	0.1823
action94	0.5013	0.3008	-0.7519	0.5397	0.1823
action95	0.5013	0.3008	0	0.5397	0.1823
action96	0.5013	0.3008	0	0.5801	0.1823
action97	0.5013	0.1003	0.7519	0.3865	0.2971
action98	0.5013	0.1003	-0.7519	0.4083	0.2971
action99	0.5013	0.1003	0	0.4083	0.2971
action100	0.5013	0.1003	0	0.4315	0.2971
action101	0.5013	-0.1003	0.7519	0.0737	0.3008
action102	0.5013	-0.1003	-0.7519	0.0737	0.3008
action103	0.5013	-0.1003	0	0.0737	0.3008
action104	0.5013	-0.1003	0	0.1105	0.3008
action105	0.5013	-0.3008	0.7519	-0.1519	0.3077
action106	0.5013	-0.3008	-0.7519	-0.1811	0.3077
action107	0.5013	-0.3008	0	-0.1811	0.3077
action108	0.5013	-0.3008	0	-0.2074	0.3077
action109	0.5013	-0.5013	0.7519	-0.298	0.3132
action110	0.5013	-0.5013	-0.7519	-0.298	0.3132
action111	0.5013	-0.5013	0	-0.298	0.3132
action112	0.5013	-0.5013	0	-0.298	0.3132
action113	0.5013	-0.6395	0.7519	-0.3464	0.3151
action114	0.5013	-0.6395	-0.7519	-0.3464	0.3151
action115	0.5013	-0.6395	0	-0.3464	0.3151
action116	0.5013	-0.6395	0	-0.3464	0.3151
action117	0.5013	-0.7398	0.7519	-0.3715	0.3155
action118	0.5013	-0.7398	-0.7519	-0.3715	0.3155
action119	0.5013	-0.7398	0	-0.3715	0.3155
action120	0.5013	-0.7398	0	-0.3715	0.3155
action121	0.3008	0.7329	0.7519	-0.9023	-0.8379
action122	0.3008	0.7329	-0.7519	-0.9023	-0.8379
action123	0.3008	0.7329	0	-0.9023	-0.8379
action124	0.3008	0.7329	0	-0.9023	-0.8379
action125	0.3008	0.6395	0.7519	0.4701	-0.7827
action126	0.3008	0.6395	-0.7519	0.4701	-0.786
action127	0.3008	0.6395	0	0.4701	-0.786
action128	0.3008	0.6395	0	0.4315	-0.787
action129	0.3008	0.5082	0.7519	0.8158	-0.449
action130	0.3008	0.5082	-0.7519	0.8469	-0.4489
action131	0.3008	0.5082	0	0.8469	-0.4489
action132	0.3008	0.5082	0	0.8611	-0.449
action133	0.3008	0.3008	0.7519	0.5047	0.1823
action134	0.3008	0.3008	-0.7519	0.5047	0.1823
action135	0.3008	0.3008	0	0.5047	0.1823
action136	0.3008	0.3008	0	0.5047	0.1823
action137	0.3008	0.1003	0.7519	0.3865	0.2971
action138	0.3008	0.1003	-0.7519	0.3865	0.2971
action139	0.3008	0.1003	0	0.3865	0.2971
action140	0.3008	0.1003	0	0.3865	0.2971
action141	0.3008	-0.1003	0.7519	0.0737	0.3008
action142	0.3008	-0.1003	-0.7519	0.0737	0.3008
action143	0.3008	-0.1003	0	0.0737	0.3008
action144	0.3008	-0.1003	0	0.0737	0.3008
action145	0.3008	-0.3008	0.7519	-0.2074	0.3077
action146	0.3008	-0.3008	-0.7519	-0.2074	0.3077
action147	0.3008	-0.3008	0	-0.2074	0.3077
action148	0.3008	-0.3008	0	-0.2074	0.3077
action149	0.3008	-0.5013	0.7519	-0.298	0.3132
action150	0.3008	-0.5013	-0.7519	-0.298	0.3132
action151	0.3008	-0.5013	0	-0.298	0.3132
action152	0.3008	-0.5013	0	-0.298	0.3132
action153	0.3008	-0.6395	0.7519	-0.3464	0.3151
action154	0.3008	-0.6395	-0.7519	-0.3464	0.3151
action155	0.3008	-0.6395	0	-0.3464	0.3151
action156	0.3008	-0.6395	0	-0.3464	0.3151
action157	0.3008	-0.7398	0.7519	-0.4167	0.3155
action158	0.3008	-0.7398	-0.7519	-0.3994	0.3155
action159	0.3008	-0.7398	0	-0.3994	0.3155
action160	0.3008	-0.7398	0	-0.3844	0.3155
action161	0.1003	0.7329	0.7519	-0.9023	-0.8327
action162	0.1003	0.7329	-0.7519	-0.9023	-0.8327
action163	0.1003	0.7329	0	-0.9023	-0.8327
action164	0.1003	0.7329	0	-0.9023	-0.8327
action165	0.1003	0.6395	0.7519	0.3673	-0.7763
action166	0.1003	0.6395	-0.7519	0.4524	-0.7758
action167	0.1003	0.6395	0	0.4524	-0.7758
action168	0.1003	0.6395	0	0.4315	-0.7789
action169	0.1003	0.5082	0.7519	0.709	-0.4445
action170	0.1003	0.5082	-0.7519	0.709	-0.446
action171	0.1003	0.5082	0	0.709	-0.446
action172	0.1003	0.5082	0	0.7781	-0.4475
action173	0.1003	0.3008	0.7519	0.4881	0.1823
action174	0.1003	0.3008	-0.7519	0.4881	0.1823
action175	0.1003	0.3008	0	0.4881	0.1823
action176	0.1003	0.3008	0	0.4881	0.1823
action177	0.1003	0.1003	0.7519	0.3673	0.2971
action178	0.1003	0.1003	-0.7519	0.3673	0.2971
action179	0.1003	0.1003	0	0.3673	0.2971
action180	0.1003	0.1003	0	0.3673	0.2971
action181	0.1003	-0.1003	0.7519	0.0737	0.3008
action182	0.1003	-0.1003	-0.7519	0.0737	0.3008
action183	0.1003	-0.1003	0	0.0737	0.3008
action184	0.1003	-0.1003	0	0.0737	0.3008
action185	0.1003	-0.3008	0.7519	-0.2074	0.3077
action186	0.1003	-0.3008	-0.7519	-0.2074	0.3077
action187	0.1003	-0.3008	0	-0.2074	0.3077
action188	0.1003	-0.3008	0	-0.2074	0.3077
action189	0.1003	-0.5013	0.7519	-0.298	0.3132
action190	0.1003	-0.5013	-0.7519	-0.298	0.3132
action191	0.1003	-0.5013	0	-0.298	0.3132
action192	0.1003	-0.5013	0	-0.298	0.3132
action193	0.1003	-0.6395	0.7519	-0.3464	0.3151
action194	0.1003	-0.6395	-0.7519	-0.3464	0.3151
action195	0.1003	-0.6395	0	-0.3464	0.3151
action196	0.1003	-0.6395	0	-0.3464	0.3151
action197	0.1003	-0.7398	0.7519	-0.4341	0.3155
action198	0.1003	-0.7398	-0.7519	-0.4341	0.3155
action199	0.1003	-0.7398	0	-0.4341	0.3155
action200	0.1003	-0.7398	0	-0.4167	0.3155
action201	-0.1003	0.7329	0.7519	-0.9023	-0.8277
action202	-0.1003	0.7329	-0.7519	-0.9023	-0.8277
action203	-0.1003	0.7329	0	-0.9023	-0.8277
action204	-0.1003	0.7329	0	-0.9023	-0.8277
action205	-0.1003	0.6395	0.7519	0.3165	-0.7639
action206	-0.1003	0.6395	-0.7519	0.3165	-0.7639
action207	-0.1003	0.6395	0	0.3165	-0.7639
action208	-0.1003	0.6395	0	0.4083	-0.7669
action209	-0.1003	0.5082	0.7519	0.709	-0.4402
action210	-0.1003	0.5082	-0.7519	0.709	-0.4424
action211	-0.1003	0.5082	0	0.709	-0.4424
action212	-0.1003	0.5082	0	0.709	-0.4407
action213	-0.1003	0.3008	0.7519	0.4701	0.1835
action214	-0.1003	0.3008	-0.7519	0.4701	0.1823
action215	-0.1003	0.3008	0	0.4701	0.1823
action216	-0.1003	0.3008	0	0.4881	0.1844
action217	-0.1003	0.1003	0.7519	0.3673	0.2971
action218	-0.1003	0.1003	-0.7519	0.3673	0.2971
action219	-0.1003	0.1003	0	0.3673	0.2971
action220	-0.1003	0.1003	0	0.3673	0.2971
action221	-0.1003	-0.1003	0.7519	0.0737	0.3008
action222	-0.1003	-0.1003	-0.7519	0.0737	0.3008
action223	-0.1003	-0.1003	0	0.0737	0.3008
action224	-0.1003	-0.1003	0	0.0737	0.3008
action225	-0.1003	-0.3008	0.7519	-0.2074	0.3077
action226	-0.1003	-0.3008	-0.7519	-0.2074	0.3077
action227	-0.1003	-0.3008	0	-0.2074	0.3077
action228	-0.1003	-0.3008	0	-0.2074	0.3077
action229	-0.1003	-0.5013	0.7519	-0.298	0.3132
action230	-0.1003	-0.5013	-0.7519	-0.298	0.3132
action231	-0.1003	-0.5013	0	-0.298	0.3132
action232	-0.1003	-0.5013	0	-0.298	0.3132
action233	-0.1003	-0.6395	0.7519	-0.3464	0.3151
action234	-0.1003	-0.6395	-0.7519	-0.3464	0.3151
action235	-0.1003	-0.6395	0	-0.3464	0.3151
action236	-0.1003	-0.6395	0	-0.359	0.3151
action237	-0.1003	-0.7398	0.7519	-0.4468	0.3155
action238	-0.1003	-0.7398	-0.7519	-0.4618	0.3155
action239	-0.1003	-0.7398	0	-0.4618	0.3155
action240	-0.1003	-0.7398	0	-0.4167	0.3155
action241	-0.3008	0.7329	0.7519	-0.9023	-0.8237
action242	-0.3008	0.7329	-0.7519	-0.9023	-0.8237
action243	-0.3008	0.7329	0	-0.9023	-0.8237
action244	-0.3008	0.7329	0	-0.9023	-0.8237
action245	-0.3008	0.6395	0.7519	0.2903	-0.7513
action246	-0.3008	0.6395	-0.7519	0.2903	-0.753
action247	-0.3008	0.6395	0	0.2903	-0.753
action248	-0.3008	0.6395	0	0.3428	-0.7533
action249	-0.3008	0.5082	0.7519	0.709	-0.4346
action250	-0.3008	0.5082	-0.7519	0.5801	-0.4369
action251	-0.3008	0.5082	0	0.5801	-0.4369
action252	-0.3008	0.5082	0	0.6416	-0.4344
action253	-0.3008	0.3008	0.7519	0.4524	0.1857
action254	-0.3008	0.3008	-0.7519	0.4524	0.1823
action255	-0.3008	0.3008	0	0.4524	0.1823
action256	-0.3008	0.3008	0	0.4881	0.1863
action257	-0.3008	0.1003	0.7519	0.3673	0.2971
action258	-0.3008	0.1003	-0.7519	0.3673	0.2971
action259	-0.3008	0.1003	0	0.3673	0.2971
action260	-0.3008	0.1003	0	0.3673	0.2971
action261	-0.3008	-0.1003	0.7519	0.0737	0.3008
action262	-0.3008	-0.1003	-0.7519	0.0737	0.3008
action263	-0.3008	-0.1003	0	0.0737	0.3008
action264	-0.3008	-0.1003	0	0.0737	0.3008
action265	-0.3008	-0.3008	0.7519	-0.2074	0.3077
action266	-0.3008	-0.3008	-0.7519	-0.2074	0.3077
action267	-0.3008	-0.3008	0	-0.2074	0.3077
action268	-0.3008	-0.3008	0	-0.2309	0.3077
action269	-0.3008	-0.5013	0.7519	-0.298	0.3132
action270	-0.3008	-0.5013	-0.7519	-0.298	0.3132
action271	-0.3008	-0.5013	0	-0.298	0.3132
action272	-0.3008	-0.5013	0	-0.298	0.3132
action273	-0.3008	-0.6395	0.7519	-0.359	0.3151
action274	-0.3008	-0.6395	-0.7519	-0.3464	0.3151
action275	-0.3008	-0.6395	0	-0.3464	0.3151
action276	-0.3008	-0.6395	0	-0.359	0.3151
action277	-0.3008	-0.7398	0.7519	-0.4618	0.3155
action278	-0.3008	-0.7398	-0.7519	-0.4618	0.3155
action279	-0.3008	-0.7398	0	-0.4618	0.3155
action280	-0.3008	-0.7398	0	-0.4468	0.3155
action281	-0.5013	0.7329	0.7519	-0.9023	-0.8193
action282	-0.5013	0.7329	-0.7519	-0.9023	-0.8193
action283	-0.5013	0.7329	0	-0.9023	-0.8193
action284	-0.5013	0.7329	0	-0.9023	-0.8193
action285	-0.5013	0.6395	0.7519	0.223	-0.7312
action286	-0.5013	0.6395	-0.7519	0.2575	-0.7347
action287	-0.5013	0.6395	0	0.2575	-0.7347
action288	-0.5013	0.6395	0	0.2903	-0.7373
action289	-0.5013	0.5082	0.7519	0.6416	-0.4277
action290	-0.5013	0.5082	-0.7519	0.5801	-0.4307
action291	-0.5013	0.5082	0	0.5801	-0.4307
action292	-0.5013	0.5082	0	0.6416	-0.4264
action293	-0.5013	0.3008	0.7519	0.4524	0.1875
action294	-0.5013	0.3008	-0.7519	0.4315	0.1857
action295	-0.5013	0.3008	0	0.4315	0.1857
action296	-0.5013	0.3008	0	0.4315	0.189
action297	-0.5013	0.1003	0.7519	0.3428	0.2971
action298	-0.5013	0.1003	-0.7519	0.3428	0.2971
action299	-0.5013	0.1003	0	0.3428	0.2971
action300	-0.5013	0.1003	0	0.3428	0.2971
action301	-0.5013	-0.1003	0.7519	0.0352	0.3008
action302	-0.5013	-0.1003	-0.7519	0.0352	0.3008
action303	-0.5013	-0.1003	0	0.0352	0.3008
action304	-0.5013	-0.1003	0	0.0737	0.3008
action305	-0.5013	-0.3008	0.7519	-0.2309	0.3077
action306	-0.5013	-0.3008	-0.7519	-0.2074	0.3077
action307	-0.5013	-0.3008	0	-0.2074	0.3077
action308	-0.5013	-0.3008	0	-0.2309	0.3077
action309	-0.5013	-0.5013	0.7519	-0.3167	0.3132
action310	-0.5013	-0.5013	-0.7519	-0.298	0.3132
action311	-0.5013	-0.5013	0	-0.298	0.3132
action312	-0.5013	-0.5013	0	-0.298	0.3132
action313	-0.5013	-0.6395	0.7519	-0.3715	0.3151
action314	-0.5013	-0.6395	-0.7519	-0.359	0.3151
action315	-0.5013	-0.6395	0	-0.359	0.3151
action316	-0.5013	-0.6395	0	-0.359	0.3151
action317	-0.5013	-0.7398	0.7519	-0.4618	0.3155
action318	-0.5013	-0.7398	-0.7519	-0.4618	0.3155
action319	-0.5013	-0.7398	0	-0.4618	0.3155
action320	-0.5013	-0.7398	0	-0.4468	0.3155
action321	-0.6349	0.7329	0.7519	-0.9023	-0.8159
action322	-0.6349	0.7329	-0.7519	-0.9023	-0.8159
action323	-0.6349	0.7329	0	-0.9023	-0.8159
action324	-0.6349	0.7329	0	-0.9023	-0.8159
action325	-0.6349	0.6395	0.7519	0.1471	-0.718
action326	-0.6349	0.6395	-0.7519	0.2575	-0.7185
action327	-0.6349	0.6395	0	0.2575	-0.7185
action328	-0.6349	0.6395	0	0.3165	-0.7234
action329	-0.6349	0.5082	0.7519	0.5591	-0.4257
action330	-0.6349	0.5082	-0.7519	0.4524	-0.4251
action331	-0.6349	0.5082	0	0.4524	-0.4251
action332	-0.6349	0.5082	0	0.5213	-0.4186
action333	-0.6349	0.3008	0.7519	0.4083	0.1875
action334	-0.6349	0.3008	-0.7519	0.4083	0.1878
action335	-0.6349	0.3008	0	0.4083	0.1878
action336	-0.6349	0.3008	0	0.4083	0.193
action337	-0.6349	0.1003	0.7519	0.3428	0.2971
action338	-0.6349	0.1003	-0.7519	0.3428	0.2971
action339	-0.6349	0.1003	0	0.3428	0.2971
action340	-0.6349	0.1003	0	0.3165	0.2973
action341	-0.6349	-0.1003	0.7519	0.0352	0.3008
action342	-0.6349	-0.1003	-0.7519	0.0352	0.3008
action343	-0.6349	-0.1003	0	0.0352	0.3008
action344	-0.6349	-0.1003	0	0.0737	0.3008
action345	-0.6349	-0.3008	0.7519	-0.2309	0.3077
action346	-0.6349	-0.3008	-0.7519	-0.2074	0.3077
action347	-0.6349	-0.3008	0	-0.2074	0.3077
action348	-0.6349	-0.3008	0	-0.2309	0.3077
action349	-0.6349	-0.5013	0.7519	-0.3167	0.3132
action350	-0.6349	-0.5013	-0.7519	-0.3167	0.3132
action351	-0.6349	-0.5013	0	-0.3167	0.3132
action352	-0.6349	-0.5013	0	-0.298	0.3132
action353	-0.6349	-0.6395	0.7519	-0.3715	0.3151
action354	-0.6349	-0.6395	-0.7519	-0.3715	0.3151
action355	-0.6349	-0.6395	0	-0.3715	0.3151
action356	-0.6349	-0.6395	0	-0.359	0.3151
action357	-0.6349	-0.7398	0.7519	-0.4618	0.3155
action358	-0.6349	-0.7398	-0.7519	-0.4618	0.3155
action359	-0.6349	-0.7398	0	-0.4618	0.3155
action360	-0.6349	-0.7398	0	-0.4618	0.3155
action361	-0.7352	0.7329	0.7519	-0.9023	-0.8123
action362	-0.7352	0.7329	-0.7519	-0.9023	-0.8123
action363	-0.7352	0.7329	0	-0.9023	-0.8123
action364	-0.7352	0.7329	0	-0.9023	-0.8123
action365	-0.7352	0.6395	0.7519	0.1471	-0.7044
action366	-0.7352	0.6395	-0.7519	0.1854	-0.7005
action367	-0.7352	0.6395	0	0.1854	-0.7005
action368	-0.7352	0.6395	0	0.223	-0.7101
action369	-0.7352	0.5082	0.7519	0.4701	-0.4186
action370	-0.7352	0.5082	-0.7519	0.4524	-0.4149
action371	-0.7352	0.5082	0	0.4524	-0.4149
action372	-0.7352	0.5082	0	0.5213	-0.4125
action373	-0.7352	0.3008	0.7519	0.3865	0.1887
action374	-0.7352	0.3008	-0.7519	0.3865	0.1939
action375	-0.7352	0.3008	0	0.3865	0.1939
action376	-0.7352	0.3008	0	0.3865	0.1942
action377	-0.7352	0.1003	0.7519	0.3165	0.2971
action378	-0.7352	0.1003	-0.7519	0.2903	0.2974
action379	-0.7352	0.1003	0	0.2903	0.2974
action380	-0.7352	0.1003	0	0.3165	0.2973
action381	-0.7352	-0.1003	0.7519	-0.0026	0.3008
action382	-0.7352	-0.1003	-0.7519	-0.0026	0.3008
action383	-0.7352	-0.1003	0	-0.0026	0.3008
action384	-0.7352	-0.1003	0	0.0737	0.3008
action385	-0.7352	-0.3008	0.7519	-0.2309	0.3077
action386	-0.7352	-0.3008	-0.7519	-0.2309	0.3077
action387	-0.7352	-0.3008	0	-0.2309	0.3077
action388	-0.7352	-0.3008	0	-0.2309	0.3077
action389	-0.7352	-0.5013	0.7519	-0.3167	0.3132
action390	-0.7352	-0.5013	-0.7519	-0.3167	0.3132
action391	-0.7352	-0.5013	0	-0.3167	0.3132
action392	-0.7352	-0.5013	0	-0.3167	0.3132
action393	-0.7352	-0.6395	0.7519	-0.3994	0.3151
action394	-0.7352	-0.6395	-0.7519	-0.3844	0.3151
action395	-0.7352	-0.6395	0	-0.3844	0.3151
action396	-0.7352	-0.6395	0	-0.359	0.3151
action397	-0.7352	-0.7398	0.7519	-0.4618	0.3155
action398	-0.7352	-0.7398	-0.7519	-0.4618	0.3155
action399	-0.7352	-0.7398	0	-0.4618	0.3155
action400	-0.7352	-0.7398	0	-0.4618	0.3155
Multicriteria flows	Phi	Phi+	Phi-
action13	0.5266	0.5686	0.042
action9	0.5005	0.6349	0.1344
action53	0.4982	0.5415	0.0433
action17	0.4745	0.5324	0.0579
action49	0.4686	0.6029	0.1343
action5	0.4508	0.6112	0.1604
action93	0.4482	0.5019	0.0538
action57	0.4473	0.5072	0.0599
action89	0.437	0.5782	0.1411
action133	0.4081	0.4819	0.0738
action97	0.4074	0.4772	0.0698
action21	0.4008	0.4884	0.0876
action45	0.3922	0.5556	0.1634
action129	0.3855	0.5476	0.1621
action16	0.3854	0.4767	0.0913
action15	0.372	0.4646	0.0927
action137	0.3673	0.4572	0.0899
action173	0.3647	0.4594	0.0947
action11	0.3501	0.5347	0.1846
action12	0.3489	0.5335	0.1846
action55	0.3478	0.4412	0.0934
action61	0.3469	0.4439	0.097
action85	0.3441	0.5167	0.1726
action56	0.3439	0.438	0.0941
action52	0.325	0.5095	0.1846
action169	0.3249	0.5084	0.1834
action19	0.3241	0.4322	0.108
action20	0.3241	0.4322	0.108
action177	0.3234	0.4347	0.1113
action213	0.3212	0.4368	0.1156
action51	0.3182	0.5027	0.1845
action96	0.3129	0.4143	0.1014
action101	0.3055	0.4147	0.1093
action95	0.3048	0.4075	0.1027
action7	0.3004	0.511	0.2105
action59	0.2969	0.407	0.11
action60	0.2969	0.407	0.11
action8	0.2945	0.5052	0.2106
action25	0.2905	0.4234	0.133
action92	0.2862	0.4777	0.1916
action209	0.2857	0.4885	0.2028
action91	0.2843	0.4758	0.1915
action217	0.2833	0.4146	0.1314
action253	0.278	0.4143	0.1363
action125	0.2759	0.4743	0.1984
action48	0.2671	0.4784	0.2113
action100	0.266	0.3837	0.1177
action141	0.2654	0.3947	0.1293
action65	0.2625	0.3996	0.1371
action99	0.2614	0.3801	0.1187
action135	0.2577	0.3816	0.1239
action136	0.2577	0.3816	0.1239
action249	0.2467	0.4687	0.2219
action23	0.2452	0.3846	0.1394
action24	0.2452	0.3846	0.1394
action132	0.2442	0.4557	0.2115
action257	0.2432	0.3946	0.1514
action47	0.2419	0.4554	0.2135
action131	0.2414	0.4531	0.2117
action293	0.2383	0.3943	0.156
action29	0.2294	0.3955	0.1661
action181	0.2253	0.3746	0.1494
action105	0.2216	0.3744	0.1527
action14	0.2216	0.4145	0.1929
action139	0.2169	0.3569	0.14
action140	0.2169	0.3569	0.14
action165	0.2165	0.4405	0.2239
action175	0.2143	0.3591	0.1448
action176	0.2143	0.3591	0.1448
action64	0.2042	0.3488	0.1446
action333	0.2027	0.3808	0.1781
action10	0.1998	0.4846	0.2848
action297	0.1982	0.3711	0.173
action54	0.1974	0.3911	0.1937
action63	0.1965	0.3436	0.1471
action289	0.1945	0.4368	0.2423
action87	0.19	0.4135	0.2235
action172	0.1878	0.4207	0.2329
action221	0.1852	0.3546	0.1694
action69	0.1801	0.3681	0.1879
action373	0.1785	0.3777	0.1992
action216	0.1746	0.3392	0.1646
action171	0.1743	0.4081	0.2338
action18	0.1738	0.382	0.2083
action179	0.173	0.3344	0.1614
action180	0.173	0.3344	0.1614
action337	0.1714	0.3644	0.193
action215	0.1706	0.3365	0.1659
action145	0.1704	0.3512	0.1807
action205	0.1688	0.4149	0.2461
action50	0.1679	0.4526	0.2847
action33	0.1661	0.3805	0.2144
action88	0.1634	0.3919	0.2284
action104	0.1624	0.319	0.1565
action103	0.1551	0.3145	0.1594
action94	0.1544	0.3573	0.2029
action109	0.1534	0.348	0.1946
action329	0.1517	0.4163	0.2646
action6	0.1501	0.4608	0.3108
action58	0.1466	0.3568	0.2103
action377	0.1461	0.3607	0.2146
action261	0.1451	0.3345	0.1895
action37	0.1433	0.3806	0.2373
action73	0.1432	0.3604	0.2172
action27	0.1401	0.3232	0.1831
action28	0.1401	0.3232	0.1831
action212	0.1352	0.3882	0.253
action211	0.1349	0.3881	0.2532
action256	0.1349	0.3192	0.1843
action90	0.1339	0.4256	0.2917
action219	0.1329	0.3144	0.1815
action220	0.1329	0.3144	0.1815
action185	0.1303	0.3311	0.2008
action255	0.1269	0.3139	0.187
action245	0.1259	0.3926	0.2667
action127	0.1249	0.3734	0.2485
action77	0.1232	0.3605	0.2373
action128	0.117	0.3674	0.2504
action113	0.1164	0.3404	0.2239
action369	0.1153	0.4025	0.2873
action143	0.115	0.2944	0.1794
action144	0.115	0.2944	0.1794
action149	0.1133	0.328	0.2147
action67	0.1121	0.2993	0.1872
action98	0.111	0.33	0.219
action134	0.1073	0.3315	0.2242
action68	0.098	0.2942	0.1961
action301	0.0973	0.3099	0.2126
action22	0.0948	0.3344	0.2396
action1	0.0928	0.444	0.3512
action259	0.0928	0.2943	0.2015
action260	0.0928	0.2943	0.2015
action46	0.0915	0.4053	0.3138
action117	0.0915	0.3405	0.249
action130	0.091	0.4029	0.3119
action225	0.0902	0.3111	0.2208
action296	0.084	0.2909	0.2069
action295	0.0833	0.2907	0.2074
action167	0.0833	0.3527	0.2694
action252	0.0829	0.3563	0.2734
action31	0.079	0.2952	0.2162
action32	0.079	0.2952	0.2162
action168	0.0785	0.3489	0.2705
action285	0.0764	0.3643	0.2879
action153	0.0763	0.3203	0.244
action183	0.0749	0.2744	0.1995
action184	0.0749	0.2744	0.1995
action41	0.0738	0.4239	0.3502
action189	0.0732	0.3079	0.2347
action341	0.0705	0.3032	0.2327
action251	0.0701	0.346	0.2758
action138	0.0665	0.3068	0.2402
action107	0.0654	0.2724	0.207
action174	0.0639	0.309	0.2451
action108	0.0602	0.271	0.2108
action336	0.0534	0.2808	0.2273
action335	0.0524	0.2806	0.2282
action265	0.0501	0.291	0.2409
action81	0.0482	0.4039	0.3557
action300	0.0478	0.2709	0.2231
action299	0.0478	0.2709	0.2231
action62	0.0461	0.2935	0.2474
action292	0.0444	0.3366	0.2922
action381	0.0429	0.299	0.2561
action157	0.0423	0.3204	0.2781
action86	0.0396	0.3633	0.3237
action325	0.0371	0.3483	0.3112
action193	0.0362	0.3003	0.264
action208	0.0361	0.327	0.2909
action223	0.0348	0.2543	0.2195
action224	0.0348	0.2543	0.2195
action72	0.0343	0.2687	0.2344
action229	0.0331	0.2879	0.2548
action291	0.0313	0.3262	0.2949
action71	0.0298	0.2678	0.2381
action376	0.0293	0.2777	0.2484
action375	0.0292	0.2777	0.2485
action170	0.0239	0.3579	0.334
action178	0.0226	0.2843	0.2617
action339	0.021	0.2642	0.2431
action214	0.0202	0.2864	0.2662
action147	0.0201	0.2509	0.2309
action148	0.0201	0.2509	0.2309
action365	0.0198	0.3497	0.3299
action207	0.0184	0.3146	0.2963
action340	0.0158	0.2605	0.2447
action35	0.0129	0.2802	0.2674
action36	0.0129	0.2802	0.2674
action121	0.0091	0.3838	0.3748
action305	0.0053	0.2697	0.2644
action102	0.0047	0.2644	0.2596
action111	0.003	0.2478	0.2447
action112	0.003	0.2478	0.2447
action197	-0.0013	0.3004	0.3016
action233	-0.0039	0.2802	0.2841
action380	-0.0042	0.2605	0.2647
action332	-0.0048	0.3101	0.3149
action263	-0.0053	0.2343	0.2396
action264	-0.0053	0.2343	0.2396
action269	-0.007	0.2678	0.2748
action39	-0.0071	0.2803	0.2874
action40	-0.0071	0.2803	0.2874
action75	-0.0072	0.2602	0.2674
action76	-0.0072	0.2602	0.2674
action379	-0.0095	0.2569	0.2663
action26	-0.0103	0.2731	0.2834
action248	-0.0143	0.2995	0.3138
action210	-0.0155	0.338	0.3535
action218	-0.0175	0.2642	0.2817
action331	-0.0199	0.2995	0.3194
action187	-0.02	0.2309	0.2509
action188	-0.02	0.2309	0.2509
action345	-0.0214	0.263	0.2844
action254	-0.0234	0.2638	0.2872
action372	-0.0236	0.3102	0.3339
action247	-0.0248	0.2922	0.317
action126	-0.0255	0.3232	0.3487
action79	-0.0272	0.2603	0.2874
action80	-0.0272	0.2603	0.2874
action161	-0.03	0.3638	0.3938
action115	-0.0339	0.2401	0.2741
action116	-0.0339	0.2401	0.2741
action142	-0.0354	0.2443	0.2797
action151	-0.0371	0.2277	0.2648
action152	-0.0371	0.2277	0.2648
action371	-0.0379	0.2998	0.3377
action66	-0.0383	0.2492	0.2875
action385	-0.0414	0.263	0.3045
action237	-0.0439	0.2803	0.3242
action304	-0.0454	0.2142	0.2596
action273	-0.0465	0.2602	0.3066
action309	-0.0508	0.2473	0.2982
action303	-0.0531	0.2096	0.2627
action3	-0.0576	0.3437	0.4013
action4	-0.0576	0.3437	0.4013
action258	-0.0576	0.2442	0.3018
action119	-0.0589	0.2402	0.2991
action120	-0.0589	0.2402	0.2991
action227	-0.0601	0.2108	0.271
action228	-0.0601	0.2108	0.271
action288	-0.0618	0.2737	0.3354
action294	-0.067	0.2406	0.3077
action166	-0.0671	0.3026	0.3697
action287	-0.0678	0.269	0.3368
action201	-0.0691	0.3437	0.4128
action30	-0.0713	0.2451	0.3164
action344	-0.0721	0.2076	0.2797
action155	-0.074	0.2201	0.2941
action156	-0.074	0.2201	0.2941
action182	-0.0755	0.2243	0.2997
action43	-0.0766	0.3237	0.4003
action44	-0.0766	0.3237	0.4003
action191	-0.0772	0.2077	0.2848
action192	-0.0772	0.2077	0.2848
action349	-0.0776	0.2407	0.3182
action343	-0.0798	0.2029	0.2828
action250	-0.0803	0.2958	0.3761
action328	-0.0805	0.272	0.3525
action106	-0.0849	0.2223	0.3072
action277	-0.087	0.2603	0.3473
action313	-0.0891	0.2401	0.3292
action327	-0.0913	0.264	0.3552
action384	-0.0922	0.2076	0.2997
action389	-0.0976	0.2407	0.3383
action334	-0.098	0.2304	0.3284
action267	-0.1002	0.1908	0.291
action160	-0.1016	0.2202	0.3218
action83	-0.1022	0.3036	0.4058
action84	-0.1022	0.3036	0.4058
action298	-0.1026	0.2207	0.3233
action159	-0.1046	0.2202	0.3248
action268	-0.1049	0.1895	0.2944
action383	-0.1075	0.1988	0.3062
action241	-0.1084	0.3237	0.4321
action195	-0.1141	0.2	0.3142
action196	-0.1141	0.2	0.3142
action222	-0.1156	0.2042	0.3198
action353	-0.1158	0.2334	0.3492
action368	-0.1165	0.2595	0.376
action231	-0.1173	0.1876	0.3049
action232	-0.1173	0.1876	0.3049
action290	-0.1191	0.276	0.3951
action70	-0.1206	0.2177	0.3383
action374	-0.1212	0.2276	0.3487
action367	-0.1221	0.255	0.3771
action317	-0.1271	0.2402	0.3673
action338	-0.1293	0.2141	0.3434
action146	-0.1303	0.2008	0.3311
action206	-0.132	0.2645	0.3965
action34	-0.1375	0.2301	0.3676
action307	-0.1403	0.1707	0.3111
action123	-0.1413	0.2836	0.4249
action124	-0.1413	0.2836	0.4249
action393	-0.1414	0.2334	0.3749
action308	-0.145	0.1695	0.3145
action110	-0.1473	0.1976	0.345
action281	-0.1476	0.3036	0.4513
action200	-0.1481	0.2001	0.3482
action199	-0.1516	0.2001	0.3517
action357	-0.1538	0.2335	0.3874
action235	-0.1542	0.18	0.3342
action262	-0.1557	0.1842	0.3398
action236	-0.1568	0.18	0.3367
action271	-0.1574	0.1676	0.3249
action272	-0.1574	0.1676	0.3249
action38	-0.1575	0.2302	0.3877
action74	-0.1576	0.21	0.3676
action378	-0.1598	0.2068	0.3666
action347	-0.1671	0.164	0.3311
action330	-0.1703	0.2494	0.4196
action186	-0.1704	0.1808	0.3512
action348	-0.1718	0.1628	0.3345
action321	-0.1737	0.2969	0.4706
action397	-0.1739	0.2335	0.4074
action246	-0.1752	0.242	0.4172
action78	-0.1775	0.2101	0.3877
action163	-0.1804	0.2635	0.4439
action164	-0.1804	0.2635	0.4439
action114	-0.1843	0.19	0.3743
action150	-0.1874	0.1776	0.365
action240	-0.1882	0.1801	0.3683
action370	-0.1883	0.2497	0.438
action387	-0.1918	0.1628	0.3546
action388	-0.1918	0.1628	0.3546
action361	-0.193	0.2969	0.49
action275	-0.1943	0.1599	0.3543
action276	-0.1969	0.1599	0.3568
action239	-0.1973	0.1801	0.3773
action311	-0.1975	0.1475	0.345
action312	-0.1975	0.1475	0.345
action302	-0.2035	0.1595	0.363
action2	-0.2079	0.2936	0.5016
action118	-0.2093	0.1901	0.3994
action226	-0.2105	0.1607	0.3712
action286	-0.2181	0.2189	0.4371
action203	-0.2195	0.2435	0.4629
action204	-0.2195	0.2435	0.4629
action352	-0.2242	0.1408	0.365
action154	-0.2244	0.1699	0.3944
action42	-0.227	0.2736	0.5005
action190	-0.2275	0.1575	0.3851
action351	-0.2279	0.1404	0.3683
action342	-0.2302	0.1528	0.383
action280	-0.2344	0.16	0.3944
action315	-0.237	0.1399	0.3768
action316	-0.237	0.1399	0.3768
action279	-0.2374	0.16	0.3974
action326	-0.2416	0.2138	0.4555
action391	-0.248	0.1404	0.3884
action392	-0.248	0.1404	0.3884
action266	-0.2506	0.1407	0.3913
action82	-0.2526	0.2535	0.5061
action158	-0.255	0.17	0.425
action382	-0.2578	0.1487	0.4065
action243	-0.2588	0.2234	0.4822
action244	-0.2588	0.2234	0.4822
action356	-0.2637	0.1332	0.3969
action194	-0.2645	0.1499	0.4144
action355	-0.2662	0.1332	0.3994
action230	-0.2676	0.1375	0.4051
action366	-0.2725	0.2049	0.4774
action320	-0.2745	0.14	0.4144
action319	-0.2775	0.14	0.4174
action396	-0.2837	0.1332	0.4169
action395	-0.2888	0.1332	0.422
action306	-0.2907	0.1206	0.4113
action122	-0.2917	0.2335	0.5251
action283	-0.298	0.2034	0.5014
action284	-0.298	0.2034	0.5014
action198	-0.302	0.15	0.452
action359	-0.3042	0.1333	0.4375
action360	-0.3042	0.1333	0.4375
action234	-0.3046	0.1298	0.4345
action270	-0.3077	0.1174	0.4252
action346	-0.3174	0.1139	0.4314
action323	-0.324	0.1967	0.5207
action324	-0.324	0.1967	0.5207
action399	-0.3243	0.1333	0.4575
action400	-0.3243	0.1333	0.4575
action162	-0.3308	0.2134	0.5442
action386	-0.3422	0.1126	0.4548
action363	-0.3434	0.1967	0.5401
action364	-0.3434	0.1967	0.5401
action274	-0.3447	0.1098	0.4545
action238	-0.3476	0.1299	0.4776
action310	-0.3478	0.0974	0.4452
action202	-0.3698	0.1934	0.5632
action350	-0.3783	0.0903	0.4686
action314	-0.3873	0.0897	0.4771
action278	-0.3877	0.1099	0.4976
action390	-0.3984	0.0903	0.4886
action242	-0.4091	0.1733	0.5825
action354	-0.4166	0.0831	0.4996
action318	-0.4278	0.0898	0.5177
action394	-0.4392	0.0831	0.5223
action282	-0.4484	0.1533	0.6016
action358	-0.4546	0.0832	0.5377
action322	-0.4744	0.1466	0.621
action398	-0.4746	0.0832	0.5578
action362	-0.4938	0.1466	0.6403

## Sheet: syn-linear-uncertainty-ranking
A	Phi	Phi+	Phi-	Rank	SF	PP	Measure	Last Iter.	Coverage	Coverage
A13	0.5266	0.5686	0.042	1	0.01	0.3	0.006	7.9	81.13	0.8113
A9	0.5005	0.6349	0.1344	2	0.01	0.2	0.006	10.4	58.37	0.5837
A53	0.4982	0.5415	0.0433	3	0.02	0.3	0.006	7.7	81.13	0.8113
A17	0.4745	0.5324	0.0579	4	0.01	0.4	0.006	7	91.83	0.9183
A49	0.4686	0.6029	0.1343	5	0.02	0.2	0.006	9.3	58.52	0.5852
A5	0.4508	0.6112	0.1604	6	0.01	0.1	0.006	9.7	16.89	0.1689
A93	0.4482	0.5019	0.0538	7	0.03	0.3	0.006	7.1	81.13	0.8113
A57	0.4473	0.5072	0.0599	8	0.02	0.4	0.006	6.8	91.83	0.9183
A89	0.437	0.5782	0.1411	9	0.03	0.2	0.006	9	58.83	0.5883
A133	0.4081	0.4819	0.0738	10	0.04	0.3	0.006	7.1	81.13	0.8113

## Sheet: real-v-shape-equal
Scenario	Scenario1
Evaluations	Seeding Fraction	Average PP	Measure	Average Last Iteration	Average Coverage
action1	0.01	0.01	0.02	1	1
action2	0.01	0.01	3.69	1	1
action3	0.01	0.01	2.12	1	1
action4	0.01	0.01	0.03	1	1
action5	0.01	0.1	0.02	8.5	4.48
action6	0.01	0.1	3.69	8.4	4.65
action7	0.01	0.1	2.12	8.4	4.65
action8	0.01	0.1	0.03	9	2.93
action9	0.01	0.2	0.02	15	15.75
action10	0.01	0.2	3.69	14.6	16.5
action11	0.01	0.2	2.12	14.6	16.5
action12	0.01	0.2	0.03	21	14.87
action13	0.01	0.3	0.02	15.3	30.92
action14	0.01	0.3	3.69	14.5	31.04
action15	0.01	0.3	2.12	14.5	31.04
action16	0.01	0.3	0.03	17.3	30.78
action17	0.01	0.4	0.02	16.2	43.74
action18	0.01	0.4	3.69	14.2	43.63
action19	0.01	0.4	2.12	14.2	43.63
action20	0.01	0.4	0.03	17.6	43.73
action21	0.01	0.5	0.02	13.8	53.73
action22	0.01	0.5	3.69	13.1	53.55
action23	0.01	0.5	2.12	13.1	53.55
action24	0.01	0.5	0.03	15.1	53.73
action25	0.01	0.6	0.02	12.3	61.16
action26	0.01	0.6	3.69	11.2	60.84
action27	0.01	0.6	2.12	11.2	60.84
action28	0.01	0.6	0.03	14	61.16
action29	0.01	0.7	0.02	12.6	66.82
action30	0.01	0.7	3.69	11.4	66.5
action31	0.01	0.7	2.12	11.4	66.5
action32	0.01	0.7	0.03	13.8	66.82
action33	0.01	0.8	0.02	11.9	71.06
action34	0.01	0.8	3.69	10.8	70.75
action35	0.01	0.8	2.12	10.8	70.75
action36	0.01	0.8	0.03	13.2	71.06
action37	0.01	0.9	0.02	11.1	74.34
action38	0.01	0.9	3.69	10.4	74.02
action39	0.01	0.9	2.12	10.4	74.02
action40	0.01	0.9	0.03	12.1	74.34
action41	0.02	0.01	0.02	1	2
action42	0.02	0.01	3.69	1	2
action43	0.02	0.01	2.12	1	2
action44	0.02	0.01	0.03	1	2
action45	0.02	0.1	0.02	7.1	6.62
action46	0.02	0.1	3.69	7.5	6.85
action47	0.02	0.1	2.12	7.5	6.85
action48	0.02	0.1	0.03	8.3	4.26
action49	0.02	0.2	0.02	12.3	17.28
action50	0.02	0.2	3.69	12.2	17.95
action51	0.02	0.2	2.12	12.2	17.95
action52	0.02	0.2	0.03	18.1	15.08
action53	0.02	0.3	0.02	14.1	31.21
action54	0.02	0.3	3.69	13.1	31.59
action55	0.02	0.3	2.12	13.1	31.59
action56	0.02	0.3	0.03	16.5	30.81
action57	0.02	0.4	0.02	15.4	43.84
action58	0.02	0.4	3.69	13.5	43.83
action59	0.02	0.4	2.12	13.5	43.83
action60	0.02	0.4	0.03	17.1	43.74
action61	0.02	0.5	0.02	13.2	53.82
action62	0.02	0.5	3.69	12.4	53.65
action63	0.02	0.5	2.12	12.4	53.65
action64	0.02	0.5	0.03	14.4	53.73
action65	0.02	0.6	0.02	11.6	61.18
action66	0.02	0.6	3.69	10.7	60.88
action67	0.02	0.6	2.12	10.7	60.88
action68	0.02	0.6	0.03	13.7	61.16
action69	0.02	0.7	0.02	11.7	66.82
action70	0.02	0.7	3.69	11.1	66.5
action71	0.02	0.7	2.12	11.1	66.5
action72	0.02	0.7	0.03	13.3	66.82
action73	0.02	0.8	0.02	11	71.06
action74	0.02	0.8	3.69	10.3	70.75
action75	0.02	0.8	2.12	10.3	70.75
action76	0.02	0.8	0.03	12.7	71.06
action77	0.02	0.9	0.02	10.3	74.34
action78	0.02	0.9	3.69	9.7	74.02
action79	0.02	0.9	2.12	9.7	74.02
action80	0.02	0.9	0.03	11.8	74.34
action81	0.03	0.01	0.02	1	3
action82	0.03	0.01	3.69	1	3
action83	0.03	0.01	2.12	1	3
action84	0.03	0.01	0.03	1	3
action85	0.03	0.1	0.02	6.8	8.1
action86	0.03	0.1	3.69	7.6	8.77
action87	0.03	0.1	2.12	7.6	8.77
action88	0.03	0.1	0.03	7.6	5.57
action89	0.03	0.2	0.02	11.4	18.37
action90	0.03	0.2	3.69	10.3	19.8
action91	0.03	0.2	2.12	10.3	19.8
action92	0.03	0.2	0.03	17.1	15.86
action93	0.03	0.3	0.02	13.6	31.7
action94	0.03	0.3	3.69	11.9	32.63
action95	0.03	0.3	2.12	11.9	32.63
action96	0.03	0.3	0.03	15.5	30.97
action97	0.03	0.4	0.02	14.5	43.94
action98	0.03	0.4	3.69	12.9	44.36
action99	0.03	0.4	2.12	12.9	44.36
action100	0.03	0.4	0.03	16.7	43.8
action101	0.03	0.5	0.02	13	53.82
action102	0.03	0.5	3.69	11.7	53.84
action103	0.03	0.5	2.12	11.7	53.84
action104	0.03	0.5	0.03	14.2	53.76
action105	0.03	0.6	0.02	11.3	61.18
action106	0.03	0.6	3.69	10.4	60.93
action107	0.03	0.6	2.12	10.4	60.93
action108	0.03	0.6	0.03	12.7	61.17
action109	0.03	0.7	0.02	11.4	66.82
action110	0.03	0.7	3.69	10.3	66.53
action111	0.03	0.7	2.12	10.3	66.53
action112	0.03	0.7	0.03	12.6	66.82
action113	0.03	0.8	0.02	10.8	71.06
action114	0.03	0.8	3.69	9.5	70.75
action115	0.03	0.8	2.12	9.5	70.75
action116	0.03	0.8	0.03	12.1	71.06
action117	0.03	0.9	0.02	10.1	74.34
action118	0.03	0.9	3.69	8.9	74.02
action119	0.03	0.9	2.12	8.9	74.02
action120	0.03	0.9	0.03	11	74.34
action121	0.04	0.01	0.02	1	3.99
action122	0.04	0.01	3.69	1	3.99
action123	0.04	0.01	2.12	1	3.99
action124	0.04	0.01	0.03	1	3.99
action125	0.04	0.1	0.02	6.1	9.84
action126	0.04	0.1	3.69	7.1	10.24
action127	0.04	0.1	2.12	7.1	10.24
action128	0.04	0.1	0.03	7.6	6.75
action129	0.04	0.2	0.02	9.3	19.97
action130	0.04	0.2	3.69	9.4	21.07
action131	0.04	0.2	2.12	9.4	21.07
action132	0.04	0.2	0.03	15.4	16.42
action133	0.04	0.3	0.02	12.1	32.52
action134	0.04	0.3	3.69	11	33.55
action135	0.04	0.3	2.12	11	33.55
action136	0.04	0.3	0.03	15.4	31.19
action137	0.04	0.4	0.02	13.8	44.27
action138	0.04	0.4	3.69	12.3	44.85
action139	0.04	0.4	2.12	12.3	44.85
action140	0.04	0.4	0.03	16.3	43.91
action141	0.04	0.5	0.02	12.7	53.96
action142	0.04	0.5	3.69	11.3	54.23
action143	0.04	0.5	2.12	11.3	54.23
action144	0.04	0.5	0.03	14	53.84
action145	0.04	0.6	0.02	10.9	61.29
action146	0.04	0.6	3.69	10.1	61.19
action147	0.04	0.6	2.12	10.1	61.19
action148	0.04	0.6	0.03	12.6	61.22
action149	0.04	0.7	0.02	11.4	66.91
action150	0.04	0.7	3.69	10.1	66.68
action151	0.04	0.7	2.12	10.1	66.68
action152	0.04	0.7	0.03	12.3	66.83
action153	0.04	0.8	0.02	10.6	71.09
action154	0.04	0.8	3.69	9.2	70.83
action155	0.04	0.8	2.12	9.2	70.83
action156	0.04	0.8	0.03	11.9	71.07
action157	0.04	0.9	0.02	9.8	74.34
action158	0.04	0.9	3.69	8.4	74.06
action159	0.04	0.9	2.12	8.4	74.06
action160	0.04	0.9	0.03	10.8	74.35
action161	0.05	0.01	0.02	1	4.99
action162	0.05	0.01	3.69	1	4.99
action163	0.05	0.01	2.12	1	4.99
action164	0.05	0.01	0.03	1	4.99
action165	0.05	0.1	0.02	6.1	11.3
action166	0.05	0.1	3.69	6.9	11.79
action167	0.05	0.1	2.12	6.9	11.79
action168	0.05	0.1	0.03	7.1	7.93
action169	0.05	0.2	0.02	8.6	21.48
action170	0.05	0.2	3.69	8.6	22.57
action171	0.05	0.2	2.12	8.6	22.57
action172	0.05	0.2	0.03	13.9	17.16
action173	0.05	0.3	0.02	11.4	33.46
action174	0.05	0.3	3.69	10.8	34.76
action175	0.05	0.3	2.12	10.8	34.76
action176	0.05	0.3	0.03	14.9	31.45
action177	0.05	0.4	0.02	12	44.79
action178	0.05	0.4	3.69	10.9	45.64
action179	0.05	0.4	2.12	10.9	45.64
action180	0.05	0.4	0.03	16.1	44.04
action181	0.05	0.5	0.02	11.5	54.2
action182	0.05	0.5	3.69	10.3	54.63
action183	0.05	0.5	2.12	10.3	54.63
action184	0.05	0.5	0.03	13.7	53.92
action185	0.05	0.6	0.02	10.6	61.36
action186	0.05	0.6	3.69	9.2	61.37
action187	0.05	0.6	2.12	9.2	61.37
action188	0.05	0.6	0.03	12.4	61.25
action189	0.05	0.7	0.02	11	66.91
action190	0.05	0.7	3.69	9.1	66.83
action191	0.05	0.7	2.12	9.1	66.83
action192	0.05	0.7	0.03	12.3	66.85
action193	0.05	0.8	0.02	10.5	71.09
action194	0.05	0.8	3.69	8.7	70.86
action195	0.05	0.8	2.12	8.7	70.86
action196	0.05	0.8	0.03	11.6	71.08
action197	0.05	0.9	0.02	9.8	74.34
action198	0.05	0.9	3.69	8	74.06
action199	0.05	0.9	2.12	8	74.06
action200	0.05	0.9	0.03	10.5	74.35
action201	0.06	0.01	0.02	1	6.01
action202	0.06	0.01	3.69	1	6.01
action203	0.06	0.01	2.12	1	6.01
action204	0.06	0.01	0.03	1	6.01
action205	0.06	0.1	0.02	5.8	12.66
action206	0.06	0.1	3.69	6.5	13.22
action207	0.06	0.1	2.12	6.5	13.22
action208	0.06	0.1	0.03	7.2	9.16
action209	0.06	0.2	0.02	8.3	22.7
action210	0.06	0.2	3.69	8.1	24.07
action211	0.06	0.2	2.12	8.1	24.07
action212	0.06	0.2	0.03	13.7	17.95
action213	0.06	0.3	0.02	10.7	34.28
action214	0.06	0.3	3.69	10.1	35.84
action215	0.06	0.3	2.12	10.1	35.84
action216	0.06	0.3	0.03	14.5	31.79
action217	0.06	0.4	0.02	11.2	45.23
action218	0.06	0.4	3.69	10	46.21
action219	0.06	0.4	2.12	10	46.21
action220	0.06	0.4	0.03	16	44.27
action221	0.06	0.5	0.02	11	54.36
action222	0.06	0.5	3.69	10.1	54.98
action223	0.06	0.5	2.12	10.1	54.98
action224	0.06	0.5	0.03	13.5	54.04
action225	0.06	0.6	0.02	10.3	61.42
action226	0.06	0.6	3.69	9.2	61.53
action227	0.06	0.6	2.12	9.2	61.53
action228	0.06	0.6	0.03	12.4	61.31
action229	0.06	0.7	0.02	10.7	66.96
action230	0.06	0.7	3.69	8.8	66.94
action231	0.06	0.7	2.12	8.8	66.94
action232	0.06	0.7	0.03	12.3	66.87
action233	0.06	0.8	0.02	10	71.09
action234	0.06	0.8	3.69	8.6	70.91
action235	0.06	0.8	2.12	8.6	70.91
action236	0.06	0.8	0.03	11.6	71.08
action237	0.06	0.9	0.02	9.1	74.34
action238	0.06	0.9	3.69	7.8	74.09
action239	0.06	0.9	2.12	7.8	74.09
action240	0.06	0.9	0.03	10.5	74.35
action241	0.07	0.01	0.02	1	7
action242	0.07	0.01	3.69	1	7
action243	0.07	0.01	2.12	1	7
action244	0.07	0.01	0.03	1	7
action245	0.07	0.1	0.02	5.6	13.92
action246	0.07	0.1	3.69	6.6	14.46
action247	0.07	0.1	2.12	6.6	14.46
action248	0.07	0.1	0.03	7	10.11
action249	0.07	0.2	0.02	8.2	23.79
action250	0.07	0.2	3.69	8.3	25.19
action251	0.07	0.2	2.12	8.3	25.19
action252	0.07	0.2	0.03	13.4	18.55
action253	0.07	0.3	0.02	10.7	35.16
action254	0.07	0.3	3.69	9.7	36.55
action255	0.07	0.3	2.12	9.7	36.55
action256	0.07	0.3	0.03	14.5	32.12
action257	0.07	0.4	0.02	10.6	45.69
action258	0.07	0.4	3.69	9.5	46.63
action259	0.07	0.4	2.12	9.5	46.63
action260	0.07	0.4	0.03	16	44.48
action261	0.07	0.5	0.02	10.5	54.7
action262	0.07	0.5	3.69	9.5	55.23
action263	0.07	0.5	2.12	9.5	55.23
action264	0.07	0.5	0.03	13.5	54.19
action265	0.07	0.6	0.02	10	61.68
action266	0.07	0.6	3.69	9.1	61.67
action267	0.07	0.6	2.12	9.1	61.67
action268	0.07	0.6	0.03	12.3	61.42
action269	0.07	0.7	0.02	9.9	67.22
action270	0.07	0.7	3.69	8.7	67.01
action271	0.07	0.7	2.12	8.7	67.01
action272	0.07	0.7	0.03	12.3	66.94
action273	0.07	0.8	0.02	9	71.32
action274	0.07	0.8	3.69	8.3	70.96
action275	0.07	0.8	2.12	8.3	70.96
action276	0.07	0.8	0.03	11.6	71.13
action277	0.07	0.9	0.02	8.4	74.59
action278	0.07	0.9	3.69	7.6	74.09
action279	0.07	0.9	2.12	7.6	74.09
action280	0.07	0.9	0.03	10.5	74.38
action281	0.08	0.01	0.02	1	8
action282	0.08	0.01	3.69	1	8
action283	0.08	0.01	2.12	1	8
action284	0.08	0.01	0.03	1	8
action285	0.08	0.1	0.02	5.6	15.1
action286	0.08	0.1	3.69	6.4	15.68
action287	0.08	0.1	2.12	6.4	15.68
action288	0.08	0.1	0.03	7.1	11.16
action289	0.08	0.2	0.02	8	24.87
action290	0.08	0.2	3.69	7.8	26.32
action291	0.08	0.2	2.12	7.8	26.32
action292	0.08	0.2	0.03	12.9	19.37
action293	0.08	0.3	0.02	10.3	35.9
action294	0.08	0.3	3.69	9	37.37
action295	0.08	0.3	2.12	9	37.37
action296	0.08	0.3	0.03	14	32.57
action297	0.08	0.4	0.02	10.2	46.16
action298	0.08	0.4	3.69	8.7	47.1
action299	0.08	0.4	2.12	8.7	47.1
action300	0.08	0.4	0.03	15.6	44.76
action301	0.08	0.5	0.02	9.7	54.93
action302	0.08	0.5	3.69	8.5	55.46
action303	0.08	0.5	2.12	8.5	55.46
action304	0.08	0.5	0.03	13.4	54.35
action305	0.08	0.6	0.02	9.3	61.78
action306	0.08	0.6	3.69	8.5	61.85
action307	0.08	0.6	2.12	8.5	61.85
action308	0.08	0.6	0.03	11.9	61.54
action309	0.08	0.7	0.02	9.6	67.24
action310	0.08	0.7	3.69	8.2	67.1
action311	0.08	0.7	2.12	8.2	67.1
action312	0.08	0.7	0.03	12.2	67.01
action313	0.08	0.8	0.02	9	71.32
action314	0.08	0.8	3.69	7.6	71.06
action315	0.08	0.8	2.12	7.6	71.06
action316	0.08	0.8	0.03	11.6	71.18
action317	0.08	0.9	0.02	8.4	74.59
action318	0.08	0.9	3.69	7.1	74.13
action319	0.08	0.9	2.12	7.1	74.13
action320	0.08	0.9	0.03	10.4	74.4
action321	0.09	0.01	0.02	1	9
action322	0.09	0.01	3.69	1	9
action323	0.09	0.01	2.12	1	9
action324	0.09	0.01	0.03	1	9
action325	0.09	0.1	0.02	5.2	16.33
action326	0.09	0.1	3.69	6.4	16.82
action327	0.09	0.1	2.12	6.4	16.82
action328	0.09	0.1	0.03	7	12.14
action329	0.09	0.2	0.02	7.5	26
action330	0.09	0.2	3.69	7.7	27.34
action331	0.09	0.2	2.12	7.7	27.34
action332	0.09	0.2	0.03	12.7	20.2
action333	0.09	0.3	0.02	10.4	36.69
action334	0.09	0.3	3.69	8.5	38.15
action335	0.09	0.3	2.12	8.5	38.15
action336	0.09	0.3	0.03	13.9	33.03
action337	0.09	0.4	0.02	10	46.72
action338	0.09	0.4	3.69	8.2	47.74
action339	0.09	0.4	2.12	8.2	47.74
action340	0.09	0.4	0.03	15.5	45.04
action341	0.09	0.5	0.02	9.6	55.32
action342	0.09	0.5	3.69	8.2	55.87
action343	0.09	0.5	2.12	8.2	55.87
action344	0.09	0.5	0.03	13.3	54.51
action345	0.09	0.6	0.02	9.1	62.04
action346	0.09	0.6	3.69	8.3	62.15
action347	0.09	0.6	2.12	8.3	62.15
action348	0.09	0.6	0.03	11.9	61.66
action349	0.09	0.7	0.02	9.5	67.46
action350	0.09	0.7	3.69	8	67.34
action351	0.09	0.7	2.12	8	67.34
action352	0.09	0.7	0.03	12	67.07
action353	0.09	0.8	0.02	8.8	71.49
action354	0.09	0.8	3.69	7.5	71.17
action355	0.09	0.8	2.12	7.5	71.17
action356	0.09	0.8	0.03	11.5	71.22
action357	0.09	0.9	0.02	8.4	74.76
action358	0.09	0.9	3.69	6.9	74.18
action359	0.09	0.9	2.12	6.9	74.18
action360	0.09	0.9	0.03	10.4	74.42
action361	0.1	0.01	0.02	1	10
action362	0.1	0.01	3.69	1	10
action363	0.1	0.01	2.12	1	10
action364	0.1	0.01	0.03	1	10
action365	0.1	0.1	0.02	4.9	17.52
action366	0.1	0.1	3.69	6.3	17.93
action367	0.1	0.1	2.12	6.3	17.93
action368	0.1	0.1	0.03	6.9	13.14
action369	0.1	0.2	0.02	6.8	27.18
action370	0.1	0.2	3.69	7.7	28.43
action371	0.1	0.2	2.12	7.7	28.43
action372	0.1	0.2	0.03	12.7	21.01
action373	0.1	0.3	0.02	9.4	37.69
action374	0.1	0.3	3.69	8.2	39.08
action375	0.1	0.3	2.12	8.2	39.08
action376	0.1	0.3	0.03	13.6	33.59
action377	0.1	0.4	0.02	9.3	47.29
action378	0.1	0.4	3.69	8	48.35
action379	0.1	0.4	2.12	8	48.35
action380	0.1	0.4	0.03	15.3	45.39
action381	0.1	0.5	0.02	9.3	55.61
action382	0.1	0.5	3.69	8.1	56.31
action383	0.1	0.5	2.12	8.1	56.31
action384	0.1	0.5	0.03	13.2	54.73
action385	0.1	0.6	0.02	9	62.2
action386	0.1	0.6	3.69	8.2	62.38
action387	0.1	0.6	2.12	8.2	62.38
action388	0.1	0.6	0.03	11.7	61.8
action389	0.1	0.7	0.02	9.1	67.54
action390	0.1	0.7	3.69	7.6	67.46
action391	0.1	0.7	2.12	7.6	67.46
action392	0.1	0.7	0.03	11.9	67.14
action393	0.1	0.8	0.02	8.7	71.55
action394	0.1	0.8	3.69	7.2	71.2
action395	0.1	0.8	2.12	7.2	71.2
action396	0.1	0.8	0.03	11.5	71.27
action397	0.1	0.9	0.02	8	74.79
action398	0.1	0.9	3.69	6.8	74.19
action399	0.1	0.9	2.12	6.8	74.19
action400	0.1	0.9	0.03	10.4	74.45
Preferences	Seeding Fraction	Average PP	Measure	Average Last Iteration	Average Coverage
active	yes	yes	yes	yes	yes
Min/Max	min	min	min	max	max
Weight	1	1	1	1	1
Preference function	V-shape	V-shape	V-shape	V-shape	V-shape
Thresholds	absolute	absolute	absolute	absolute	absolute
q	1	1	1	1	1
p	0.03	0.29	0.0019	3.8	24.14
s	3	3	3	3	3
Unicriterion flows	Seeding Fraction	Average PP	Measure	Average Last Iteration	Average Coverage
action1	0.802	0.7985	0.7519	-0.9023	-0.8446
action2	0.802	0.7985	-0.7519	-0.9023	-0.8446
action3	0.802	0.7985	-0.2506	-0.9023	-0.8446
action4	0.802	0.7985	0.2506	-0.9023	-0.8446
action5	0.802	0.6741	0.7519	-0.2504	-0.8029
action6	0.802	0.6741	-0.7519	-0.2683	-0.8008
action7	0.802	0.6741	-0.2506	-0.2683	-0.8008
action8	0.802	0.6741	0.2506	-0.1565	-0.8219
action9	0.802	0.5047	0.7519	0.8207	-0.638
action10	0.802	0.5047	-0.7519	0.7854	-0.6255
action11	0.802	0.5047	-0.2506	0.7854	-0.6255
action12	0.802	0.5047	0.2506	0.9991	-0.6526
action13	0.802	0.3008	0.7519	0.8447	-0.3522
action14	0.802	0.3008	-0.7519	0.7758	-0.3497
action15	0.802	0.3008	-0.2506	0.7758	-0.3497
action16	0.802	0.3008	0.2506	0.949	-0.355
action17	0.802	0.1003	0.7519	0.9025	-0.0914
action18	0.802	0.1003	-0.7519	0.7452	-0.094
action19	0.802	0.1003	-0.2506	0.7452	-0.094
action20	0.802	0.1003	0.2506	0.9582	-0.0917
action21	0.802	-0.1003	0.7519	0.6985	0.1704
action22	0.802	-0.1003	-0.7519	0.607	0.1652
action23	0.802	-0.1003	-0.2506	0.607	0.1652
action24	0.802	-0.1003	0.2506	0.829	0.1704
action25	0.802	-0.3008	0.7519	0.4861	0.373
action26	0.802	-0.3008	-0.7519	0.2847	0.3648
action27	0.802	-0.3008	-0.2506	0.2847	0.3648
action28	0.802	-0.3008	0.2506	0.7226	0.373
action29	0.802	-0.5013	0.7519	0.5334	0.5148
action30	0.802	-0.5013	-0.7519	0.324	0.5068
action31	0.802	-0.5013	-0.2506	0.324	0.5068
action32	0.802	-0.5013	0.2506	0.6985	0.5148
action33	0.802	-0.6706	0.7519	0.4174	0.6132
action34	0.802	-0.6706	-0.7519	0.2051	0.6065
action35	0.802	-0.6706	-0.2506	0.2051	0.6065
action36	0.802	-0.6706	0.2506	0.6207	0.6132
action37	0.802	-0.8055	0.7519	0.2649	0.6818
action38	0.802	-0.8055	-0.7519	0.1235	0.6752
action39	0.802	-0.8055	-0.2506	0.1235	0.6752
action40	0.802	-0.8055	0.2506	0.4528	0.6818
action41	0.6683	0.7985	0.7519	-0.9023	-0.833
action42	0.6683	0.7985	-0.7519	-0.9023	-0.833
action43	0.6683	0.7985	-0.2506	-0.9023	-0.833
action44	0.6683	0.7985	0.2506	-0.9023	-0.833
action45	0.6683	0.6741	0.7519	-0.4793	-0.7763
action46	0.6683	0.6741	-0.7519	-0.4189	-0.7734
action47	0.6683	0.6741	-0.2506	-0.4189	-0.7734
action48	0.6683	0.6741	0.2506	-0.286	-0.8057
action49	0.6683	0.5047	0.7519	0.4861	-0.6125
action50	0.6683	0.5047	-0.7519	0.4696	-0.6014
action51	0.6683	0.5047	-0.2506	0.4696	-0.6014
action52	0.6683	0.5047	0.2506	0.9703	-0.6491
action53	0.6683	0.3008	0.7519	0.7343	-0.3462
action54	0.6683	0.3008	-0.7519	0.607	-0.3385
action55	0.6683	0.3008	-0.2506	0.607	-0.3385
action56	0.6683	0.3008	0.2506	0.9171	-0.3544
action57	0.6683	0.1003	0.7519	0.8521	-0.0891
action58	0.6683	0.1003	-0.7519	0.6605	-0.0893
action59	0.6683	0.1003	-0.2506	0.6605	-0.0893
action60	0.6683	0.1003	0.2506	0.9419	-0.0914
action61	0.6683	-0.1003	0.7519	0.6207	0.1731
action62	0.6683	-0.1003	-0.7519	0.5022	0.1681
action63	0.6683	-0.1003	-0.2506	0.5022	0.1681
action64	0.6683	-0.1003	0.2506	0.7658	0.1704
action65	0.6683	-0.3008	0.7519	0.3616	0.3735
action66	0.6683	-0.3008	-0.7519	0.1848	0.3658
action67	0.6683	-0.3008	-0.2506	0.1848	0.3658
action68	0.6683	-0.3008	0.2506	0.6859	0.373
action69	0.6683	-0.5013	0.7519	0.3802	0.5148
action70	0.6683	-0.5013	-0.7519	0.2649	0.5068
action71	0.6683	-0.5013	-0.2506	0.2649	0.5068
action72	0.6683	-0.5013	0.2506	0.6342	0.5148
action73	0.6683	-0.6706	0.7519	0.2453	0.6132
action74	0.6683	-0.6706	-0.7519	0.103	0.6065
action75	0.6683	-0.6706	-0.2506	0.103	0.6065
action76	0.6683	-0.6706	0.2506	0.5487	0.6132
action77	0.6683	-0.8055	0.7519	0.103	0.6818
action78	0.6683	-0.8055	-0.7519	-0.0195	0.6752
action79	0.6683	-0.8055	-0.2506	-0.0195	0.6752
action80	0.6683	-0.8055	0.2506	0.399	0.6818
action81	0.5013	0.7985	0.7519	-0.9023	-0.8211
action82	0.5013	0.7985	-0.7519	-0.9023	-0.8211
action83	0.5013	0.7985	-0.2506	-0.9023	-0.8211
action84	0.5013	0.7985	0.2506	-0.9023	-0.8211
action85	0.5013	0.6741	0.7519	-0.5215	-0.7565
action86	0.5013	0.6741	-0.7519	-0.4033	-0.747
action87	0.5013	0.6741	-0.2506	-0.4033	-0.747
action88	0.5013	0.6741	0.2506	-0.4033	-0.7894
action89	0.5013	0.5047	0.7519	0.324	-0.5944
action90	0.5013	0.5047	-0.7519	0.103	-0.5705
action91	0.5013	0.5047	-0.2506	0.103	-0.5705
action92	0.5013	0.5047	0.2506	0.9419	-0.6361
action93	0.5013	0.3008	0.7519	0.6733	-0.3362
action94	0.5013	0.3008	-0.7519	0.4174	-0.3171
action95	0.5013	0.3008	-0.2506	0.4174	-0.3171
action96	0.5013	0.3008	0.2506	0.8593	-0.3511
action97	0.5013	0.1003	0.7519	0.7758	-0.0868
action98	0.5013	0.1003	-0.7519	0.5786	-0.0771
action99	0.5013	0.1003	-0.2506	0.5786	-0.0771
action100	0.5013	0.1003	0.2506	0.9259	-0.09
action101	0.5013	-0.1003	0.7519	0.593	0.1731
action102	0.5013	-0.1003	-0.7519	0.3802	0.1736
action103	0.5013	-0.1003	-0.2506	0.3802	0.1736
action104	0.5013	-0.1003	0.2506	0.7452	0.1713
action105	0.5013	-0.3008	0.7519	0.3044	0.3735
action106	0.5013	-0.3008	-0.7519	0.1235	0.3671
action107	0.5013	-0.3008	-0.2506	0.1235	0.3671
action108	0.5013	-0.3008	0.2506	0.5487	0.3732
action109	0.5013	-0.5013	0.7519	0.324	0.5148
action110	0.5013	-0.5013	-0.7519	0.103	0.5076
action111	0.5013	-0.5013	-0.2506	0.103	0.5076
action112	0.5013	-0.5013	0.2506	0.5334	0.5148
action113	0.5013	-0.6706	0.7519	0.2051	0.6132
action114	0.5013	-0.6706	-0.7519	-0.0593	0.6065
action115	0.5013	-0.6706	-0.2506	-0.0593	0.6065
action116	0.5013	-0.6706	0.2506	0.4528	0.6132
action117	0.5013	-0.8055	0.7519	0.0619	0.6818
action118	0.5013	-0.8055	-0.7519	-0.1757	0.6752
action119	0.5013	-0.8055	-0.2506	-0.1757	0.6752
action120	0.5013	-0.8055	0.2506	0.2453	0.6818
action121	0.3008	0.7985	0.7519	-0.9023	-0.809
action122	0.3008	0.7985	-0.7519	-0.9023	-0.809
action123	0.3008	0.7985	-0.2506	-0.9023	-0.809
action124	0.3008	0.7985	0.2506	-0.9023	-0.809
action125	0.3008	0.6741	0.7519	-0.6069	-0.7314
action126	0.3008	0.6741	-0.7519	-0.4793	-0.7254
action127	0.3008	0.6741	-0.2506	-0.4793	-0.7254
action128	0.3008	0.6741	0.2506	-0.4033	-0.7746
action129	0.3008	0.5047	0.7519	-0.0987	-0.5675
action130	0.3008	0.5047	-0.7519	-0.079	-0.5472
action131	0.3008	0.5047	-0.2506	-0.079	-0.5472
action132	0.3008	0.5047	0.2506	0.8521	-0.6268
action133	0.3008	0.3008	0.7519	0.4528	-0.3194
action134	0.3008	0.3008	-0.7519	0.2453	-0.2987
action135	0.3008	0.3008	-0.2506	0.2453	-0.2987
action136	0.3008	0.3008	0.2506	0.8521	-0.3467
action137	0.3008	0.1003	0.7519	0.6985	-0.0791
action138	0.3008	0.1003	-0.7519	0.4861	-0.0658
action139	0.3008	0.1003	-0.2506	0.4861	-0.0658
action140	0.3008	0.1003	0.2506	0.9074	-0.0875
action141	0.3008	-0.1003	0.7519	0.5487	0.1771
action142	0.3008	-0.1003	-0.7519	0.3044	0.185
action143	0.3008	-0.1003	-0.2506	0.3044	0.185
action144	0.3008	-0.1003	0.2506	0.7226	0.1736
action145	0.3008	-0.3008	0.7519	0.2254	0.3763
action146	0.3008	-0.3008	-0.7519	0.0619	0.3738
action147	0.3008	-0.3008	-0.2506	0.0619	0.3738
action148	0.3008	-0.3008	0.2506	0.5334	0.3745
action149	0.3008	-0.5013	0.7519	0.324	0.5171
action150	0.3008	-0.5013	-0.7519	0.0619	0.5113
action151	0.3008	-0.5013	-0.2506	0.0619	0.5113
action152	0.3008	-0.5013	0.2506	0.4861	0.5151
action153	0.3008	-0.6706	0.7519	0.1645	0.6138
action154	0.3008	-0.6706	-0.7519	-0.1181	0.6082
action155	0.3008	-0.6706	-0.2506	-0.1181	0.6082
action156	0.3008	-0.6706	0.2506	0.4174	0.6134
action157	0.3008	-0.8055	0.7519	0.0007	0.6818
action158	0.3008	-0.8055	-0.7519	-0.2683	0.676
action159	0.3008	-0.8055	-0.2506	-0.2683	0.676
action160	0.3008	-0.8055	0.2506	0.2051	0.682
action161	0.1003	0.7985	0.7519	-0.9023	-0.7966
action162	0.1003	0.7985	-0.7519	-0.9023	-0.7966
action163	0.1003	0.7985	-0.2506	-0.9023	-0.7966
action164	0.1003	0.7985	0.2506	-0.9023	-0.7966
action165	0.1003	0.6741	0.7519	-0.6069	-0.7094
action166	0.1003	0.6741	-0.7519	-0.5078	-0.7019
action167	0.1003	0.6741	-0.2506	-0.5078	-0.7019
action168	0.1003	0.6741	0.2506	-0.4793	-0.7588
action169	0.1003	0.5047	0.7519	-0.232	-0.5394
action170	0.1003	0.5047	-0.7519	-0.232	-0.5181
action171	0.1003	0.5047	-0.2506	-0.232	-0.5181
action172	0.1003	0.5047	0.2506	0.7109	-0.6145
action173	0.1003	0.3008	0.7519	0.324	-0.3005
action174	0.1003	0.3008	-0.7519	0.2051	-0.2755
action175	0.1003	0.3008	-0.2506	0.2051	-0.2755
action176	0.1003	0.3008	0.2506	0.8123	-0.3414
action177	0.1003	0.1003	0.7519	0.4354	-0.0672
action178	0.1003	0.1003	-0.7519	0.2254	-0.0478
action179	0.1003	0.1003	-0.2506	0.2254	-0.0478
action180	0.1003	0.1003	0.2506	0.8972	-0.0844
action181	0.1003	-0.1003	0.7519	0.3428	0.1841
action182	0.1003	-0.1003	-0.7519	0.103	0.1966
action183	0.1003	-0.1003	-0.2506	0.103	0.1966
action184	0.1003	-0.1003	0.2506	0.6859	0.176
action185	0.1003	-0.3008	0.7519	0.1645	0.3781
action186	0.1003	-0.3008	-0.7519	-0.1181	0.3784
action187	0.1003	-0.3008	-0.2506	-0.1181	0.3784
action188	0.1003	-0.3008	0.2506	0.5022	0.3753
action189	0.1003	-0.5013	0.7519	0.2453	0.5171
action190	0.1003	-0.5013	-0.7519	-0.1374	0.5151
action191	0.1003	-0.5013	-0.2506	-0.1374	0.5151
action192	0.1003	-0.5013	0.2506	0.4861	0.5156
action193	0.1003	-0.6706	0.7519	0.144	0.6138
action194	0.1003	-0.6706	-0.7519	-0.2132	0.6089
action195	0.1003	-0.6706	-0.2506	-0.2132	0.6089
action196	0.1003	-0.6706	0.2506	0.3616	0.6136
action197	0.1003	-0.8055	0.7519	0.0007	0.6818
action198	0.1003	-0.8055	-0.7519	-0.3377	0.676
action199	0.1003	-0.8055	-0.2506	-0.3377	0.676
action200	0.1003	-0.8055	0.2506	0.144	0.682
action201	-0.1003	0.7985	0.7519	-0.9023	-0.7839
action202	-0.1003	0.7985	-0.7519	-0.9023	-0.7839
action203	-0.1003	0.7985	-0.2506	-0.9023	-0.7839
action204	-0.1003	0.7985	0.2506	-0.9023	-0.7839
action205	-0.1003	0.6741	0.7519	-0.639	-0.6883
action206	-0.1003	0.6741	-0.7519	-0.5609	-0.6794
action207	-0.1003	0.6741	-0.2506	-0.5609	-0.6794
action208	-0.1003	0.6741	0.2506	-0.4646	-0.7414
action209	-0.1003	0.5047	0.7519	-0.286	-0.5155
action210	-0.1003	0.5047	-0.7519	-0.3208	-0.4876
action211	-0.1003	0.5047	-0.2506	-0.3208	-0.4876
action212	-0.1003	0.5047	0.2506	0.6859	-0.6014
action213	-0.1003	0.3008	0.7519	0.1848	-0.2845
action214	-0.1003	0.3008	-0.7519	0.0619	-0.2553
action215	-0.1003	0.3008	-0.2506	0.0619	-0.2553
action216	-0.1003	0.3008	0.2506	0.7758	-0.3344
action217	-0.1003	0.1003	0.7519	0.2847	-0.0571
action218	-0.1003	0.1003	-0.7519	0.0414	-0.035
action219	-0.1003	0.1003	-0.2506	0.0414	-0.035
action220	-0.1003	0.1003	0.2506	0.8914	-0.0791
action221	-0.1003	-0.1003	0.7519	0.2453	0.1888
action222	-0.1003	-0.1003	-0.7519	0.0619	0.2068
action223	-0.1003	-0.1003	-0.2506	0.0619	0.2068
action224	-0.1003	-0.1003	0.2506	0.6605	0.1795
action225	-0.1003	-0.3008	0.7519	0.103	0.3797
action226	-0.1003	-0.3008	-0.7519	-0.1181	0.3825
action227	-0.1003	-0.3008	-0.2506	-0.1181	0.3825
action228	-0.1003	-0.3008	0.2506	0.5022	0.3768
action229	-0.1003	-0.5013	0.7519	0.1848	0.5183
action230	-0.1003	-0.5013	-0.7519	-0.1946	0.5178
action231	-0.1003	-0.5013	-0.2506	-0.1946	0.5178
action232	-0.1003	-0.5013	0.2506	0.4861	0.5161
action233	-0.1003	-0.6706	0.7519	0.0414	0.6138
action234	-0.1003	-0.6706	-0.7519	-0.232	0.6099
action235	-0.1003	-0.6706	-0.2506	-0.232	0.6099
action236	-0.1003	-0.6706	0.2506	0.3616	0.6136
action237	-0.1003	-0.8055	0.7519	-0.1374	0.6818
action238	-0.1003	-0.8055	-0.7519	-0.3711	0.6766
action239	-0.1003	-0.8055	-0.2506	-0.3711	0.6766
action240	-0.1003	-0.8055	0.2506	0.144	0.682
action241	-0.3008	0.7985	0.7519	-0.9023	-0.7714
action242	-0.3008	0.7985	-0.7519	-0.9023	-0.7714
action243	-0.3008	0.7985	-0.2506	-0.9023	-0.7714
action244	-0.3008	0.7985	0.2506	-0.9023	-0.7714
action245	-0.3008	0.6741	0.7519	-0.6591	-0.6681
action246	-0.3008	0.6741	-0.7519	-0.5482	-0.6593
action247	-0.3008	0.6741	-0.2506	-0.5482	-0.6593
action248	-0.3008	0.6741	0.2506	-0.4937	-0.7274
action249	-0.3008	0.5047	0.7519	-0.3035	-0.4933
action250	-0.3008	0.5047	-0.7519	-0.286	-0.4644
action251	-0.3008	0.5047	-0.2506	-0.286	-0.4644
action252	-0.3008	0.5047	0.2506	0.6474	-0.5914
action253	-0.3008	0.3008	0.7519	0.1848	-0.2679
action254	-0.3008	0.3008	-0.7519	-0.0195	-0.2422
action255	-0.3008	0.3008	-0.2506	-0.0195	-0.2422
action256	-0.3008	0.3008	0.2506	0.7758	-0.3275
action257	-0.3008	0.1003	0.7519	0.1645	-0.0467
action258	-0.3008	0.1003	-0.7519	-0.0593	-0.0255
action259	-0.3008	0.1003	-0.2506	-0.0593	-0.0255
action260	-0.3008	0.1003	0.2506	0.8914	-0.0743
action261	-0.3008	-0.1003	0.7519	0.144	0.1986
action262	-0.3008	-0.1003	-0.7519	-0.0593	0.214
action263	-0.3008	-0.1003	-0.2506	-0.0593	0.214
action264	-0.3008	-0.1003	0.2506	0.6605	0.1838
action265	-0.3008	-0.3008	0.7519	0.0414	0.3863
action266	-0.3008	-0.3008	-0.7519	-0.1374	0.386
action267	-0.3008	-0.3008	-0.2506	-0.1374	0.386
action268	-0.3008	-0.3008	0.2506	0.4861	0.3797
action269	-0.3008	-0.5013	0.7519	0.021	0.5248
action270	-0.3008	-0.5013	-0.7519	-0.2132	0.5196
action271	-0.3008	-0.5013	-0.2506	-0.2132	0.5196
action272	-0.3008	-0.5013	0.2506	0.4861	0.5178
action273	-0.3008	-0.6706	0.7519	-0.1565	0.6187
action274	-0.3008	-0.6706	-0.7519	-0.286	0.611
action275	-0.3008	-0.6706	-0.2506	-0.286	0.611
action276	-0.3008	-0.6706	0.2506	0.3616	0.6147
action277	-0.3008	-0.8055	0.7519	-0.2683	0.687
action278	-0.3008	-0.8055	-0.7519	-0.4033	0.6766
action279	-0.3008	-0.8055	-0.2506	-0.4033	0.6766
action280	-0.3008	-0.8055	0.2506	0.144	0.6826
action281	-0.5013	0.7985	0.7519	-0.9023	-0.7579
action282	-0.5013	0.7985	-0.7519	-0.9023	-0.7579
action283	-0.5013	0.7985	-0.2506	-0.9023	-0.7579
action284	-0.5013	0.7985	0.2506	-0.9023	-0.7579
action285	-0.5013	0.6741	0.7519	-0.6591	-0.6488
action286	-0.5013	0.6741	-0.7519	-0.5728	-0.6391
action287	-0.5013	0.6741	-0.2506	-0.5728	-0.6391
action288	-0.5013	0.6741	0.2506	-0.4793	-0.7116
action289	-0.5013	0.5047	0.7519	-0.3377	-0.471
action290	-0.5013	0.5047	-0.7519	-0.3711	-0.4415
action291	-0.5013	0.5047	-0.2506	-0.3711	-0.4415
action292	-0.5013	0.5047	0.2506	0.5786	-0.5778
action293	-0.5013	0.3008	0.7519	0.103	-0.2541
action294	-0.5013	0.3008	-0.7519	-0.1565	-0.2265
action295	-0.5013	0.3008	-0.2506	-0.1565	-0.2265
action296	-0.5013	0.3008	0.2506	0.7226	-0.3183
action297	-0.5013	0.1003	0.7519	0.0825	-0.0361
action298	-0.5013	0.1003	-0.7519	-0.2132	-0.0142
action299	-0.5013	0.1003	-0.2506	-0.2132	-0.0142
action300	-0.5013	0.1003	0.2506	0.8661	-0.0679
action301	-0.5013	-0.1003	0.7519	-0.0195	0.2053
action302	-0.5013	-0.1003	-0.7519	-0.2504	0.2205
action303	-0.5013	-0.1003	-0.2506	-0.2504	0.2205
action304	-0.5013	-0.1003	0.2506	0.6474	0.1885
action305	-0.5013	-0.3008	0.7519	-0.0987	0.3888
action306	-0.5013	-0.3008	-0.7519	-0.2504	0.3906
action307	-0.5013	-0.3008	-0.2506	-0.2504	0.3906
action308	-0.5013	-0.3008	0.2506	0.4174	0.3827
action309	-0.5013	-0.5013	0.7519	-0.0394	0.5253
action310	-0.5013	-0.5013	-0.7519	-0.3035	0.5218
action311	-0.5013	-0.5013	-0.2506	-0.3035	0.5218
action312	-0.5013	-0.5013	0.2506	0.4696	0.5196
action313	-0.5013	-0.6706	0.7519	-0.1565	0.6187
action314	-0.5013	-0.6706	-0.7519	-0.4033	0.6132
action315	-0.5013	-0.6706	-0.2506	-0.4033	0.6132
action316	-0.5013	-0.6706	0.2506	0.3616	0.6157
action317	-0.5013	-0.8055	0.7519	-0.2683	0.687
action318	-0.5013	-0.8055	-0.7519	-0.4793	0.6774
action319	-0.5013	-0.8055	-0.2506	-0.4793	0.6774
action320	-0.5013	-0.8055	0.2506	0.1235	0.683
action321	-0.6683	0.7985	0.7519	-0.9023	-0.7437
action322	-0.6683	0.7985	-0.7519	-0.9023	-0.7437
action323	-0.6683	0.7985	-0.2506	-0.9023	-0.7437
action324	-0.6683	0.7985	0.2506	-0.9023	-0.7437
action325	-0.6683	0.6741	0.7519	-0.6956	-0.6283
action326	-0.6683	0.6741	-0.7519	-0.5728	-0.6202
action327	-0.6683	0.6741	-0.2506	-0.5728	-0.6202
action328	-0.6683	0.6741	0.2506	-0.4937	-0.6965
action329	-0.6683	0.5047	0.7519	-0.4189	-0.4479
action330	-0.6683	0.5047	-0.7519	-0.3873	-0.4212
action331	-0.6683	0.5047	-0.2506	-0.3873	-0.4212
action332	-0.6683	0.5047	0.2506	0.5487	-0.5634
action333	-0.6683	0.3008	0.7519	0.1235	-0.2397
action334	-0.6683	0.3008	-0.7519	-0.2504	-0.2099
action335	-0.6683	0.3008	-0.2506	-0.2504	-0.2099
action336	-0.6683	0.3008	0.2506	0.7109	-0.309
action337	-0.6683	0.1003	0.7519	0.0414	-0.0234
action338	-0.6683	0.1003	-0.7519	-0.3035	0.0026
action339	-0.6683	0.1003	-0.2506	-0.3035	0.0026
action340	-0.6683	0.1003	0.2506	0.8593	-0.0615
action341	-0.6683	-0.1003	0.7519	-0.0394	0.2165
action342	-0.6683	-0.1003	-0.7519	-0.3035	0.232
action343	-0.6683	-0.1003	-0.2506	-0.3035	0.232
action344	-0.6683	-0.1003	0.2506	0.6342	0.1931
action345	-0.6683	-0.3008	0.7519	-0.1374	0.3954
action346	-0.6683	-0.3008	-0.7519	-0.286	0.3982
action347	-0.6683	-0.3008	-0.2506	-0.286	0.3982
action348	-0.6683	-0.3008	0.2506	0.4174	0.3858
action349	-0.6683	-0.5013	0.7519	-0.0593	0.5308
action350	-0.6683	-0.5013	-0.7519	-0.3377	0.5278
action351	-0.6683	-0.5013	-0.2506	-0.3377	0.5278
action352	-0.6683	-0.5013	0.2506	0.4354	0.5211
action353	-0.6683	-0.6706	0.7519	-0.1946	0.6223
action354	-0.6683	-0.6706	-0.7519	-0.4189	0.6155
action355	-0.6683	-0.6706	-0.2506	-0.4189	0.6155
action356	-0.6683	-0.6706	0.2506	0.3428	0.6166
action357	-0.6683	-0.8055	0.7519	-0.2683	0.6905
action358	-0.6683	-0.8055	-0.7519	-0.5078	0.6785
action359	-0.6683	-0.8055	-0.2506	-0.5078	0.6785
action360	-0.6683	-0.8055	0.2506	0.1235	0.6835
action361	-0.802	0.7985	0.7519	-0.9023	-0.729
action362	-0.802	0.7985	-0.7519	-0.9023	-0.729
action363	-0.802	0.7985	-0.2506	-0.9023	-0.729
action364	-0.802	0.7985	0.2506	-0.9023	-0.729
action365	-0.802	0.6741	0.7519	-0.7194	-0.6086
action366	-0.802	0.6741	-0.7519	-0.5847	-0.6017
action367	-0.802	0.6741	-0.2506	-0.5847	-0.6017
action368	-0.802	0.6741	0.2506	-0.5078	-0.6807
action369	-0.802	0.5047	0.7519	-0.5215	-0.4243
action370	-0.802	0.5047	-0.7519	-0.3873	-0.4002
action371	-0.802	0.5047	-0.2506	-0.3873	-0.4002
action372	-0.802	0.5047	0.2506	0.5487	-0.5483
action373	-0.802	0.3008	0.7519	-0.079	-0.2198
action374	-0.802	0.3008	-0.7519	-0.3035	-0.1897
action375	-0.802	0.3008	-0.2506	-0.3035	-0.1897
action376	-0.802	0.3008	0.2506	0.6733	-0.2979
action377	-0.802	0.1003	0.7519	-0.0987	-0.0092
action378	-0.802	0.1003	-0.7519	-0.3377	0.0187
action379	-0.802	0.1003	-0.2506	-0.3377	0.0187
action380	-0.802	0.1003	0.2506	0.8447	-0.0535
action381	-0.802	-0.1003	0.7519	-0.0987	0.2247
action382	-0.802	-0.1003	-0.7519	-0.3208	0.2442
action383	-0.802	-0.1003	-0.2506	-0.3208	0.2442
action384	-0.802	-0.1003	0.2506	0.6207	0.1995
action385	-0.802	-0.3008	0.7519	-0.1565	0.3995
action386	-0.802	-0.3008	-0.7519	-0.3035	0.404
action387	-0.802	-0.3008	-0.2506	-0.3035	0.404
action388	-0.802	-0.3008	0.2506	0.3802	0.3893
action389	-0.802	-0.5013	0.7519	-0.1374	0.5328
action390	-0.802	-0.5013	-0.7519	-0.4033	0.5308
action391	-0.802	-0.5013	-0.2506	-0.4033	0.5308
action392	-0.802	-0.5013	0.2506	0.4174	0.5228
action393	-0.802	-0.6706	0.7519	-0.2132	0.6236
action394	-0.802	-0.6706	-0.7519	-0.4646	0.6162
action395	-0.802	-0.6706	-0.2506	-0.4646	0.6162
action396	-0.802	-0.6706	0.2506	0.3428	0.6177
action397	-0.802	-0.8055	0.7519	-0.3377	0.6911
action398	-0.802	-0.8055	-0.7519	-0.5215	0.6787
action399	-0.802	-0.8055	-0.2506	-0.5215	0.6787
action400	-0.802	-0.8055	0.2506	0.1235	0.6841
Multicriteria flows	Phi	Phi+	Phi-	Rank
action17	0.493	0.6396	0.1466	1
action13	0.4694	0.6273	0.1579	2
action21	0.4645	0.6033	0.1387	3
action57	0.4567	0.6109	0.1542	4
action9	0.4483	0.6123	0.1641	5
action61	0.4227	0.5715	0.1488	6
action25	0.4224	0.5671	0.1446	7
action53	0.4218	0.5897	0.1679	8
action29	0.4202	0.5678	0.1476	9
action97	0.4085	0.5783	0.1699	10
action20	0.4039	0.5997	0.1958	11
action24	0.3904	0.5743	0.184	12
action16	0.3895	0.5955	0.206	13
action101	0.3838	0.5474	0.1636	14
action33	0.3828	0.5503	0.1675	15
action12	0.3808	0.5928	0.212	16
action93	0.3782	0.5609	0.1827	17
action60	0.3739	0.5766	0.2027	18
action65	0.3709	0.53	0.1591	19
action28	0.3695	0.5521	0.1826	20
action69	0.3628	0.5265	0.1637	21
action49	0.3597	0.5437	0.184	22
action56	0.3565	0.5696	0.2131	23
action137	0.3545	0.5464	0.192	24
action32	0.3529	0.5422	0.1893	25
action64	0.351	0.5438	0.1929	26
action52	0.349	0.5677	0.2187	27
action37	0.339	0.5342	0.1951	28
action100	0.3376	0.5538	0.2161	29
action141	0.3356	0.5212	0.1855	30
action68	0.3354	0.5262	0.1908	31
action105	0.3261	0.5024	0.1764	32
action36	0.3232	0.5291	0.2059	33
action73	0.3216	0.5075	0.1859	34
action109	0.3181	0.4989	0.1808	35
action104	0.3136	0.5205	0.2069	36
action72	0.3134	0.5124	0.199	37
action92	0.3125	0.5435	0.231	38
action96	0.3122	0.5396	0.2275	39
action89	0.2975	0.5036	0.2061	40
action133	0.2974	0.5105	0.2131	41
action140	0.2943	0.5305	0.2362	42
action76	0.282	0.4985	0.2165	43
action113	0.2802	0.4824	0.2023	44
action77	0.2799	0.4945	0.2146	45
action149	0.2785	0.4791	0.2006	46
action40	0.2763	0.5092	0.2328	47
action108	0.2746	0.4858	0.2112	48
action136	0.2715	0.5188	0.2473	49
action145	0.2707	0.4725	0.2018	50
action144	0.2695	0.497	0.2275	51
action177	0.2641	0.4889	0.2248	52
action19	0.2606	0.5128	0.2523	53
action112	0.2598	0.4776	0.2178	54
action132	0.2563	0.5084	0.2521	55
action181	0.2558	0.4731	0.2173	56
action15	0.2556	0.5158	0.2602	57
action180	0.2528	0.5089	0.2561	58
action23	0.2447	0.4888	0.2442	59
action11	0.2432	0.5074	0.2642	60
action80	0.2389	0.4818	0.2429	61
action117	0.2383	0.47	0.2317	62
action173	0.2353	0.4748	0.2395	63
action5	0.2349	0.4862	0.2513	64
action153	0.2321	0.4576	0.2255	65
action148	0.2317	0.4637	0.232	66
action116	0.2294	0.4649	0.2355	67
action176	0.2245	0.4926	0.2681	68
action189	0.2226	0.4489	0.2262	69
action184	0.2225	0.4713	0.2488	70
action185	0.2188	0.4451	0.2264	71
action59	0.2178	0.4797	0.2619	72
action220	0.2126	0.4881	0.2755	73
action152	0.2103	0.4508	0.2405	74
action63	0.1976	0.4538	0.2562	75
action55	0.1974	0.4706	0.2732	76
action221	0.1971	0.4407	0.2436	77
action217	0.1959	0.4494	0.2535	78
action172	0.1904	0.4665	0.2761	79
action193	0.1879	0.435	0.2472	80
action157	0.1859	0.4435	0.2576	81
action188	0.1855	0.4392	0.2537	82
action156	0.1823	0.44	0.2577	83
action27	0.18	0.439	0.259	84
action216	0.1785	0.4671	0.2886	85
action129	0.1782	0.4386	0.2604	86
action224	0.178	0.4476	0.2696	87
action31	0.1762	0.4379	0.2617	88
action120	0.1747	0.4414	0.2667	89
action260	0.1735	0.4684	0.295	90
action229	0.1707	0.4215	0.2508	91
action213	0.1705	0.4386	0.2681	92
action99	0.1705	0.4484	0.2779	93
action192	0.1703	0.4308	0.2605	94
action45	0.1678	0.4562	0.2885	95
action225	0.1667	0.418	0.2513	96
action18	0.1603	0.4627	0.3024	97
action51	0.1581	0.4424	0.2842	98
action14	0.1554	0.4657	0.3103	99
action8	0.1497	0.4432	0.2936	100
action212	0.1479	0.4439	0.296	101
action197	0.1458	0.4235	0.2777	102
action228	0.1457	0.4193	0.2736	103
action22	0.1444	0.4387	0.2943	104
action10	0.1429	0.4573	0.3144	105
action103	0.1409	0.4173	0.2764	106
action256	0.1398	0.4477	0.3079	107
action264	0.1388	0.4278	0.2891	108
action261	0.1387	0.409	0.2703	109
action35	0.1385	0.4214	0.2829	110
action71	0.1376	0.4102	0.2725	111
action257	0.1338	0.4152	0.2813	112
action253	0.1337	0.4201	0.2864	113
action67	0.1335	0.4066	0.273	114
action196	0.1311	0.4125	0.2814	115
action95	0.1303	0.4256	0.2952	116
action232	0.1303	0.4108	0.2805	117
action85	0.1299	0.4363	0.3065	118
action300	0.1296	0.4444	0.3148	119
action233	0.1272	0.4036	0.2764	120
action160	0.1266	0.4165	0.2898	121
action1	0.1211	0.4705	0.3494	122
action58	0.1176	0.4296	0.312	123
action169	0.1171	0.4102	0.2931	124
action265	0.1156	0.3919	0.2763	125
action139	0.1141	0.4158	0.3016	126
action39	0.1089	0.4154	0.3065	127
action268	0.103	0.3972	0.2942	128
action252	0.1021	0.4192	0.317	129
action48	0.1003	0.4134	0.3132	130
action269	0.0991	0.3838	0.2847	131
action62	0.0973	0.4036	0.3063	132
action54	0.0971	0.4204	0.3233	133
action304	0.097	0.4062	0.3092	134
action41	0.0967	0.4505	0.3538	135
action340	0.0961	0.4303	0.3342	136
action75	0.0913	0.3892	0.2979	137
action236	0.091	0.3924	0.3014	138
action296	0.0909	0.42	0.3291	139
action272	0.0905	0.3909	0.3004	140
action107	0.0881	0.3792	0.2911	141
action143	0.0879	0.3879	0.3	142
action293	0.0801	0.3917	0.3117	143
action26	0.0798	0.3889	0.3091	144
action297	0.0795	0.3865	0.307	145
action237	0.0781	0.3899	0.3118	146
action125	0.0777	0.4169	0.3392	147
action30	0.0759	0.3878	0.3119	148
action200	0.0743	0.389	0.3147	149
action111	0.072	0.3706	0.2986	150
action209	0.071	0.3888	0.3179	151
action98	0.0702	0.3982	0.328	152
action380	0.068	0.4217	0.3537	153
action301	0.0672	0.3718	0.3045	154
action81	0.0657	0.4306	0.365	155
action344	0.0619	0.3912	0.3293	156
action135	0.0595	0.3845	0.3251	157
action50	0.0579	0.3922	0.3344	158
action91	0.0576	0.3788	0.3213	159
action336	0.057	0.4056	0.3487	160
action333	0.0536	0.3821	0.3285	161
action79	0.0536	0.3801	0.3266	162
action276	0.0511	0.3725	0.3214	163
action292	0.051	0.3905	0.3396	164
action308	0.0497	0.3679	0.3182	165
action273	0.0485	0.3649	0.3163	166
action305	0.048	0.358	0.31	167
action312	0.0475	0.3688	0.3214	168
action309	0.047	0.3576	0.3106	169
action88	0.0467	0.3879	0.3413	170
action165	0.042	0.3986	0.3566	171
action102	0.0406	0.3671	0.3265	172
action337	0.0403	0.3697	0.3294	173
action34	0.0382	0.3713	0.3331	174
action70	0.0374	0.3601	0.3227	175
action147	0.037	0.3529	0.3159	176
action240	0.0342	0.3689	0.3348	177
action384	0.0337	0.3829	0.3492	178
action66	0.0333	0.3564	0.3232	179
action341	0.0321	0.3572	0.3252	180
action249	0.0318	0.3701	0.3383	181
action7	0.0313	0.3847	0.3535	182
action94	0.0301	0.3754	0.3454	183
action121	0.028	0.4109	0.3829	184
action179	0.0255	0.3624	0.3369	185
action115	0.0254	0.3522	0.3268	186
action376	0.0249	0.3941	0.3692	187
action151	0.0244	0.3464	0.322	188
action4	0.0209	0.4204	0.3995	189
action348	0.0169	0.3548	0.3379	190
action175	0.016	0.3617	0.3457	191
action332	0.0145	0.3745	0.36	192
action138	0.0139	0.3657	0.3518	193
action277	0.0129	0.3603	0.3474	194
action316	0.0112	0.3526	0.3414	195
action349	0.0108	0.343	0.3322	196
action183	0.0098	0.3439	0.3341	197
action128	0.0095	0.3686	0.3591	198
action38	0.0087	0.3653	0.3567	199
action313	0.0084	0.3448	0.3364	200
action345	0.0082	0.3416	0.3335	201
action352	0.0075	0.3509	0.3434	202
action205	-0.0003	0.3801	0.3804	203
action44	-0.0035	0.4004	0.4039	204
action381	-0.0049	0.3454	0.3502	205
action280	-0.0058	0.349	0.3548	206
action74	-0.0089	0.3391	0.348	207
action372	-0.0093	0.3694	0.3787	208
action161	-0.0096	0.3912	0.4008	209
action373	-0.0096	0.3561	0.3657	210
action289	-0.0107	0.3506	0.3613	211
action119	-0.0111	0.3453	0.3564	212
action377	-0.0116	0.35	0.3615	213
action106	-0.0122	0.3291	0.3413	214
action142	-0.0124	0.3378	0.3502	215
action131	-0.0143	0.3425	0.3568	216
action388	-0.0165	0.3435	0.36	217
action47	-0.0201	0.3581	0.3782	218
action385	-0.0216	0.3337	0.3553	219
action392	-0.0225	0.342	0.3645	220
action356	-0.0258	0.3369	0.3627	221
action155	-0.0261	0.3267	0.3528	222
action317	-0.0272	0.3402	0.3675	223
action110	-0.0283	0.3204	0.3487	224
action389	-0.0312	0.3291	0.3603	225
action353	-0.0319	0.3288	0.3607	226
action84	-0.0346	0.3805	0.4151	227
action223	-0.0365	0.3202	0.3567	228
action187	-0.0382	0.3151	0.3532	229
action245	-0.0404	0.3617	0.4021	230
action134	-0.0408	0.3344	0.3752	231
action168	-0.0426	0.3469	0.3895	232
action90	-0.0427	0.3287	0.3714	233
action87	-0.0451	0.3402	0.3853	234
action78	-0.0467	0.33	0.3767	235
action201	-0.0472	0.3717	0.4189	236
action215	-0.0487	0.327	0.3757	237
action219	-0.0489	0.322	0.3709	238
action320	-0.0499	0.3266	0.3765	239
action396	-0.0523	0.3304	0.3827	240
action191	-0.0548	0.3069	0.3617	241
action329	-0.0557	0.3361	0.3919	242
action357	-0.0599	0.3276	0.3875	243
action393	-0.0621	0.3208	0.3829	244
action146	-0.0632	0.3028	0.366	245
action6	-0.069	0.3346	0.4036	246
action159	-0.0695	0.3181	0.3877	247
action124	-0.0723	0.3607	0.433	248
action178	-0.0748	0.3123	0.387	249
action114	-0.0748	0.3021	0.3769	250
action150	-0.0758	0.2963	0.3721	251
action208	-0.0763	0.3285	0.4048	252
action285	-0.0766	0.3433	0.42	253
action227	-0.0774	0.2954	0.3728	254
action171	-0.0791	0.3123	0.3914	255
action3	-0.0794	0.3702	0.4496	256
action360	-0.0832	0.3133	0.3966	257
action174	-0.0842	0.3116	0.3958	258
action241	-0.0848	0.3523	0.4371	259
action195	-0.0851	0.2986	0.3836	260
action182	-0.0904	0.2938	0.3842	261
action127	-0.0961	0.3192	0.4153	262
action369	-0.0983	0.3291	0.4274	263
action263	-0.0994	0.2882	0.3876	264
action397	-0.1004	0.3168	0.4172	265
action255	-0.1025	0.2998	0.4022	266
action43	-0.1038	0.3503	0.4541	267
action231	-0.1058	0.2823	0.388	268
action259	-0.1072	0.2924	0.3996	269
action400	-0.1099	0.3068	0.4166	270
action164	-0.1099	0.3411	0.451	271
action118	-0.1113	0.2952	0.4065	272
action325	-0.1132	0.3318	0.4451	273
action130	-0.1145	0.2924	0.4069	274
action248	-0.1194	0.3086	0.428	275
action46	-0.1203	0.3079	0.4283	276
action267	-0.1207	0.2739	0.3946	277
action281	-0.1222	0.333	0.4552	278
action199	-0.1235	0.2939	0.4174	279
action154	-0.1263	0.2766	0.4029	280
action235	-0.1287	0.2772	0.4059	281
action211	-0.1309	0.2895	0.4204	282
action83	-0.1348	0.3304	0.4652	283
action222	-0.1367	0.27	0.4068	284
action167	-0.1372	0.3003	0.4375	285
action186	-0.1384	0.265	0.4034	286
action365	-0.1408	0.3271	0.4679	287
action86	-0.1454	0.2901	0.4354	288
action204	-0.1474	0.3216	0.469	289
action214	-0.1489	0.2769	0.4258	290
action218	-0.1491	0.2719	0.421	291
action271	-0.1493	0.2609	0.4101	292
action321	-0.1528	0.3206	0.4733	293
action288	-0.1535	0.2902	0.4437	294
action190	-0.155	0.2567	0.4118	295
action251	-0.1594	0.2741	0.4335	296
action295	-0.1668	0.2681	0.4349	297
action158	-0.1698	0.268	0.4378	298
action239	-0.1702	0.2723	0.4425	299
action123	-0.1725	0.3106	0.4831	300
action299	-0.1758	0.2594	0.4352	301
action303	-0.1764	0.2519	0.4284	302
action361	-0.1766	0.3149	0.4915	303
action226	-0.1777	0.2453	0.423	304
action170	-0.1794	0.2621	0.4415	305
action275	-0.1794	0.2534	0.4328	306
action2	-0.1796	0.3201	0.4997	307
action307	-0.1825	0.245	0.4275	308
action207	-0.1834	0.2813	0.4647	309
action244	-0.185	0.3021	0.4872	310
action194	-0.1853	0.2484	0.4338	311
action328	-0.1868	0.2777	0.4645	312
action126	-0.1964	0.269	0.4654	313
action262	-0.1996	0.2381	0.4377	314
action254	-0.2027	0.2496	0.4524	315
action42	-0.204	0.3001	0.5042	316
action230	-0.206	0.2321	0.4382	317
action311	-0.207	0.2346	0.4416	318
action258	-0.2074	0.2423	0.4497	319
action163	-0.2101	0.2909	0.5011	320
action291	-0.2119	0.252	0.4639	321
action368	-0.2132	0.272	0.4852	322
action335	-0.2157	0.2485	0.4643	323
action279	-0.2167	0.2508	0.4675	324
action247	-0.217	0.2632	0.4801	325
action343	-0.2181	0.2359	0.454	326
action266	-0.2209	0.2238	0.4447	327
action347	-0.2215	0.2299	0.4514	328
action284	-0.2224	0.2829	0.5053	329
action198	-0.2238	0.2438	0.4675	330
action339	-0.2239	0.2407	0.4646	331
action234	-0.229	0.2271	0.456	332
action210	-0.2312	0.2394	0.4706	333
action82	-0.2351	0.2803	0.5153	334
action166	-0.2374	0.2502	0.4876	335
action315	-0.2425	0.2276	0.4701	336
action331	-0.2446	0.2401	0.4847	337
action383	-0.2459	0.2292	0.4751	338
action351	-0.246	0.2201	0.4662	339
action203	-0.2477	0.2714	0.5191	340
action375	-0.249	0.2399	0.4889	341
action270	-0.2495	0.2108	0.4603	342
action387	-0.2506	0.2226	0.4732	343
action324	-0.253	0.2704	0.5235	344
action379	-0.2543	0.2333	0.4876	345
action287	-0.2579	0.2446	0.5025	346
action250	-0.2597	0.224	0.4836	347
action294	-0.2671	0.218	0.485	348
action371	-0.2671	0.2358	0.5029	349
action238	-0.2704	0.2222	0.4926	350
action319	-0.2718	0.2284	0.5002	351
action122	-0.2728	0.2605	0.5332	352
action298	-0.2761	0.2093	0.4853	353
action302	-0.2767	0.2018	0.4785	354
action364	-0.2768	0.2648	0.5416	355
action355	-0.2786	0.214	0.4926	356
action274	-0.2797	0.2032	0.4829	357
action306	-0.2827	0.1949	0.4776	358
action206	-0.2837	0.2311	0.5148	359
action391	-0.2853	0.2108	0.4961	360
action243	-0.2853	0.252	0.5373	361
action327	-0.2876	0.2331	0.5207	362
action310	-0.3072	0.1845	0.4917	363
action162	-0.3104	0.2408	0.5512	364
action359	-0.3107	0.2145	0.5252	365
action290	-0.3122	0.2019	0.514	366
action367	-0.313	0.2283	0.5413	367
action395	-0.3144	0.2059	0.5203	368
action334	-0.316	0.1984	0.5144	369
action278	-0.317	0.2007	0.5177	370
action246	-0.3172	0.213	0.5302	371
action342	-0.3184	0.1857	0.5041	372
action346	-0.3217	0.1797	0.5015	373
action283	-0.3227	0.2328	0.5554	374
action338	-0.3242	0.1906	0.5147	375
action399	-0.3402	0.2076	0.5478	376
action314	-0.3428	0.1774	0.5202	377
action330	-0.3448	0.19	0.5348	378
action382	-0.3462	0.179	0.5252	379
action350	-0.3463	0.17	0.5163	380
action202	-0.3479	0.2213	0.5693	381
action374	-0.3493	0.1898	0.5391	382
action386	-0.3508	0.1725	0.5233	383
action323	-0.3533	0.2203	0.5736	384
action378	-0.3545	0.1832	0.5377	385
action286	-0.3582	0.1945	0.5527	386
action370	-0.3673	0.1856	0.553	387
action318	-0.3721	0.1783	0.5504	388
action363	-0.3771	0.2147	0.5918	389
action354	-0.3789	0.1639	0.5427	390
action390	-0.3855	0.1607	0.5462	391
action242	-0.3855	0.2019	0.5874	392
action326	-0.3878	0.183	0.5708	393
action358	-0.411	0.1644	0.5754	394
action366	-0.4132	0.1781	0.5914	395
action394	-0.4146	0.1558	0.5704	396
action282	-0.4229	0.1826	0.6056	397
action398	-0.4404	0.1575	0.5979	398
action322	-0.4535	0.1702	0.6237	399
action362	-0.4773	0.1646	0.6419	400

## Sheet: real-vshape-equal-ranking
A	Phi	Phi+	Phi-	Rank	SF	PP	Measure	Last Iter.	Coverage	Coverage
A17	0.493	0.6396	0.1466	1	0.01	0.4	0.02	16.2	43.74	0.4374
A13	0.4694	0.6273	0.1579	2	0.01	0.3	0.02	15.3	30.92	0.3092
A21	0.4645	0.6033	0.1387	3	0.01	0.5	0.02	13.8	53.73	0.5373
A57	0.4567	0.6109	0.1542	4	0.02	0.4	0.02	15.4	43.84	0.4384
A9	0.4483	0.6123	0.1641	5	0.01	0.2	0.02	15	15.75	0.1575
A61	0.4227	0.5715	0.1488	6	0.02	0.5	0.02	13.2	53.82	0.5382
A25	0.4224	0.5671	0.1446	7	0.01	0.6	0.02	12.3	61.16	0.6116
A53	0.4218	0.5897	0.1679	8	0.02	0.3	0.02	14.1	31.21	0.3121
A29	0.4202	0.5678	0.1476	9	0.01	0.7	0.02	12.6	66.82	0.6682
A97	0.4085	0.5783	0.1699	10	0.03	0.4	0.02	14.5	43.94	0.4394

## Sheet: v-shape-equal-comparison
Synthetic
ID	Multicriteria flows	Phi	Phi+	Phi-	Rank
1	A1	0.1118	0.4705	0.3587	124
2	A2	-0.189	0.3201	0.5091	323
3	A3	-0.0254	0.3834	0.4088	218
4	A4	-0.0518	0.3702	0.422	238
5	A5	0.4762	0.6489	0.1727	4
6	A6	0.1754	0.4985	0.3231	85
7	A7	0.339	0.5618	0.2229	23
8	A8	0.3073	0.5443	0.237	35
9	A9	0.5106	0.6656	0.155	1
10	A10	0.2098	0.5152	0.3054	67
11	A11	0.3734	0.5785	0.2051	15
12	A12	0.3459	0.5644	0.2185	22
13	A13	0.5103	0.6205	0.1102	2
14	A14	0.2057	0.467	0.2613	68
15	A15	0.3693	0.5303	0.161	17
16	A16	0.3541	0.5262	0.1721	20
17	A17	0.4833	0.5832	0.0999	3
18	A18	0.1826	0.4328	0.2503	81
19	A19	0.3461	0.4962	0.15	21
20	A20	0.3198	0.483	0.1632	29
21	A21	0.4226	0.5433	0.1207	9
22	A22	0.1156	0.3896	0.274	123
23	A23	0.2792	0.453	0.1738	44
24	A24	0.2528	0.4398	0.187	53
25	A25	0.3206	0.4886	0.168	28
26	A26	0.0199	0.3382	0.3183	181
27	A27	0.1834	0.4015	0.2181	80
28	A28	0.157	0.3883	0.2313	95
29	A29	0.2626	0.4596	0.197	51
30	A30	-0.0381	0.3092	0.3474	224
31	A31	0.1255	0.3726	0.2471	114
32	A32	0.0991	0.3594	0.2603	133
33	A33	0.1812	0.4244	0.2432	82
34	A34	-0.1247	0.2721	0.3968	284
35	A35	0.0389	0.3354	0.2965	170
36	A36	0.0125	0.3222	0.3097	188
37	A37	0.1494	0.4158	0.2664	100
38	A38	-0.1513	0.2655	0.4168	300
39	A39	0.0122	0.3288	0.3165	189
40	A40	-0.0141	0.3156	0.3297	205
41	A41	0.0862	0.4505	0.3643	142
42	A42	-0.2146	0.3001	0.5147	336
43	A43	-0.051	0.3634	0.4145	237
44	A44	-0.0774	0.3502	0.4277	255
45	A45	0.4225	0.6054	0.183	10
46	A46	0.1217	0.455	0.3333	119
47	A47	0.2853	0.5184	0.2331	42
48	A48	0.2777	0.521	0.2432	45
49	A49	0.4736	0.6365	0.1629	6
50	A50	0.1728	0.4862	0.3133	89
51	A51	0.3364	0.5495	0.2131	25
52	A52	0.3158	0.5413	0.2255	30
53	A53	0.4758	0.5943	0.1185	5
54	A54	0.1751	0.4439	0.2688	86
55	A55	0.3386	0.5072	0.1686	24
56	A56	0.3083	0.491	0.1827	34
57	A57	0.447	0.5566	0.1096	7
58	A58	0.1462	0.4062	0.2599	105
59	A59	0.3098	0.4695	0.1597	33
60	A60	0.2834	0.4563	0.1729	43
61	A61	0.3618	0.5043	0.1425	18
62	A62	0.061	0.3539	0.2928	154
63	A63	0.2246	0.4172	0.1926	64
64	A64	0.2053	0.408	0.2027	69
65	A65	0.2866	0.4648	0.1782	40
66	A66	-0.0142	0.3144	0.3286	206
67	A67	0.1494	0.3777	0.2283	101
68	A68	0.1086	0.3572	0.2486	126
69	A69	0.1979	0.4212	0.2234	72
70	A70	-0.1029	0.2709	0.3737	268
71	A71	0.0607	0.3342	0.2735	155
72	A72	0.0401	0.3238	0.2836	167
73	A73	0.1493	0.4024	0.2531	102
74	A74	-0.1514	0.2521	0.4035	301
75	A75	0.0122	0.3154	0.3032	190
76	A76	-0.0142	0.3022	0.3164	207
77	A77	0.1227	0.3958	0.2731	118
78	A78	-0.1781	0.2454	0.4235	314
79	A79	-0.0145	0.3087	0.3232	208
80	A80	-0.0409	0.2955	0.3364	227
81	A81	0.054	0.4306	0.3765	159
82	A82	-0.2467	0.2802	0.5269	350
83	A83	-0.0832	0.3435	0.4267	258
84	A84	-0.1095	0.3303	0.4399	274
85	A85	0.3728	0.5717	0.1989	16
86	A86	0.0684	0.4185	0.3501	150
87	A87	0.232	0.4818	0.2498	61
88	A88	0.1729	0.444	0.2711	88
89	A89	0.4361	0.613	0.1768	8
90	A90	0.1335	0.461	0.3275	110
91	A91	0.297	0.5243	0.2273	37
92	A92	0.2722	0.5126	0.2404	47
93	A93	0.4157	0.5537	0.138	11
94	A94	0.1243	0.4105	0.2862	117
95	A95	0.2878	0.4738	0.186	39
96	A96	0.2706	0.4676	0.197	49
97	A97	0.3977	0.5265	0.1288	12
98	A98	0.1023	0.3794	0.2771	132
99	A99	0.2659	0.4427	0.1768	50
100	A100	0.2449	0.4329	0.1881	55
101	A101	0.3143	0.4762	0.1619	31
102	A102	0.0135	0.3258	0.3123	187
103	A103	0.1771	0.3891	0.212	84
104	A104	0.1578	0.38	0.2222	94
105	A105	0.2388	0.4374	0.1986	57
106	A106	-0.0689	0.2835	0.3524	250
107	A107	0.0947	0.3468	0.2521	136
108	A108	0.0616	0.3301	0.2685	153
109	A109	0.1645	0.4012	0.2367	91
110	A110	-0.1363	0.2508	0.3871	290
111	A111	0.0273	0.3141	0.2869	176
112	A112	0.0009	0.3009	0.3	195
113	A113	0.1159	0.3824	0.2665	122
114	A114	-0.1848	0.232	0.4168	320
115	A115	-0.0213	0.2953	0.3166	215
116	A116	-0.0476	0.2821	0.3298	234
117	A117	0.0795	0.3737	0.2942	144
118	A118	-0.2213	0.2233	0.4446	339
119	A119	-0.0577	0.2866	0.3443	240
120	A120	-0.0841	0.2734	0.3575	259
121	A121	0.0151	0.4107	0.3956	186
122	A122	-0.2857	0.2603	0.546	364
123	A123	-0.1221	0.3236	0.4458	283
124	A124	-0.1485	0.3104	0.459	299
125	A125	0.2997	0.5264	0.2267	36
126	A126	-0.0019	0.3754	0.3773	196
127	A127	0.1616	0.4387	0.2771	92
128	A128	0.125	0.4188	0.2938	115
129	A129	0.387	0.5856	0.1986	13
130	A130	0.0912	0.4392	0.348	138
131	A131	0.2547	0.5025	0.2478	52
132	A132	0.2306	0.4911	0.2605	63
133	A133	0.3756	0.5337	0.1581	14
134	A134	0.0748	0.3833	0.3084	147
135	A135	0.2384	0.4466	0.2082	58
136	A136	0.212	0.4334	0.2214	66
137	A137	0.3576	0.5064	0.1488	19
138	A138	0.0568	0.356	0.2992	157
139	A139	0.2204	0.4193	0.1989	65
140	A140	0.194	0.4062	0.2121	74
141	A141	0.2742	0.4561	0.1819	46
142	A142	-0.0266	0.3057	0.3323	219
143	A143	0.137	0.3691	0.2321	108
144	A144	0.1106	0.3559	0.2452	125
145	A145	0.1851	0.4103	0.2252	78
146	A146	-0.1156	0.26	0.3756	280
147	A147	0.0479	0.3233	0.2754	162
148	A148	0.0215	0.3101	0.2885	179
149	A149	0.1244	0.3811	0.2568	116
150	A150	-0.1764	0.2308	0.4072	312
151	A151	-0.0128	0.2941	0.3069	203
152	A152	-0.0392	0.2809	0.3201	226
153	A153	0.0758	0.3623	0.2865	146
154	A154	-0.2249	0.212	0.4369	340
155	A155	-0.0614	0.2753	0.3366	244
156	A156	-0.0877	0.2621	0.3498	261
157	A157	0.0253	0.3516	0.3263	177
158	A158	-0.2709	0.2018	0.4727	359
159	A159	-0.1073	0.2651	0.3724	272
160	A160	-0.129	0.2526	0.3816	287
161	A161	-0.0238	0.3909	0.4147	217
162	A162	-0.3245	0.2405	0.565	376
163	A163	-0.1609	0.3038	0.4648	306
164	A164	-0.1873	0.2906	0.478	322
165	A165	0.235	0.4909	0.256	59
166	A166	-0.0444	0.3538	0.3982	232
167	A167	0.1191	0.4171	0.2979	121
168	A168	0.087	0.4001	0.3132	141
169	A169	0.3315	0.5522	0.2207	26
170	A170	0.0305	0.4018	0.3712	173
171	A171	0.1941	0.4651	0.271	73
172	A172	0.1777	0.4605	0.2828	83
173	A173	0.3308	0.5101	0.1793	27
174	A174	0.0301	0.3597	0.3297	175
175	A175	0.1936	0.4231	0.2294	76
176	A176	0.1672	0.4099	0.2426	90
177	A177	0.3121	0.4833	0.1711	32
178	A178	0.0114	0.3329	0.3215	191
179	A179	0.1749	0.3962	0.2213	87
180	A180	0.1486	0.383	0.2345	104
181	A181	0.2341	0.4361	0.202	60
182	A182	-0.0667	0.2857	0.3524	248
183	A183	0.0969	0.349	0.2521	134
184	A184	0.0705	0.3358	0.2653	149
185	A185	0.145	0.3903	0.2453	106
186	A186	-0.1557	0.2399	0.3957	302
187	A187	0.0078	0.3032	0.2954	192
188	A188	-0.0186	0.29	0.3086	212
189	A189	0.0843	0.3611	0.2768	143
190	A190	-0.2165	0.2107	0.4272	337
191	A191	-0.0529	0.274	0.327	239
192	A192	-0.0793	0.2608	0.3401	256
193	A193	0.0357	0.3423	0.3066	171
194	A194	-0.265	0.1919	0.4569	355
195	A195	-0.1015	0.2552	0.3567	265
196	A196	-0.1278	0.242	0.3699	286
197	A197	-0.0193	0.331	0.3504	213
198	A198	-0.3201	0.1807	0.5007	375
199	A199	-0.1565	0.244	0.4005	303
200	A200	-0.1784	0.2313	0.4097	315
201	A201	-0.0626	0.3712	0.4337	245
202	A202	-0.3633	0.2208	0.5841	385
203	A203	-0.1998	0.2841	0.4839	328
204	A204	-0.2261	0.2709	0.4971	341
205	A205	0.1848	0.4653	0.2805	79
206	A206	-0.1159	0.315	0.4309	281
207	A207	0.0477	0.3783	0.3306	163
208	A208	0.0437	0.378	0.3343	166
209	A209	0.292	0.5323	0.2403	38
210	A210	-0.0091	0.3818	0.3909	199
211	A211	0.1545	0.4452	0.2907	96
212	A212	0.1284	0.432	0.3037	111
213	A213	0.2861	0.4867	0.2007	41
214	A214	-0.0149	0.3363	0.3512	209
215	A215	0.1487	0.3996	0.2509	103
216	A216	0.1275	0.3899	0.2624	112
217	A217	0.272	0.4632	0.1912	48
218	A218	-0.0287	0.3128	0.3416	220
219	A219	0.1348	0.3762	0.2413	109
220	A220	0.1085	0.363	0.2545	127
221	A221	0.194	0.416	0.222	75
222	A222	-0.1068	0.2656	0.3724	271
223	A223	0.0568	0.329	0.2722	158
224	A224	0.0304	0.3158	0.2853	174
225	A225	0.1049	0.3702	0.2653	129
226	A226	-0.1958	0.2199	0.4157	325
227	A227	-0.0323	0.2832	0.3155	222
228	A228	-0.0587	0.27	0.3286	241
229	A229	0.0442	0.341	0.2969	164
230	A230	-0.2566	0.1907	0.4473	352
231	A231	-0.093	0.254	0.347	262
232	A232	-0.1194	0.2408	0.3602	282
233	A233	-0.0044	0.3222	0.3266	197
234	A234	-0.3051	0.1719	0.477	369
235	A235	-0.1416	0.2352	0.3767	292
236	A236	-0.1729	0.2209	0.3937	309
237	A237	-0.0635	0.3105	0.374	246
238	A238	-0.3681	0.1598	0.5279	386
239	A239	-0.2046	0.2231	0.4276	330
240	A240	-0.2185	0.2113	0.4297	338
241	A241	-0.1016	0.3515	0.453	266
242	A242	-0.4023	0.2011	0.6034	390
243	A243	-0.2387	0.2644	0.5031	347
244	A244	-0.2651	0.2512	0.5163	356
245	A245	0.1405	0.4431	0.3026	107
246	A246	-0.1605	0.2926	0.4531	305
247	A247	0.003	0.3559	0.3529	194
248	A248	-0.011	0.3494	0.3604	202
249	A249	0.2527	0.5125	0.2598	54
250	A250	-0.0718	0.3435	0.4153	251
251	A251	0.0918	0.4069	0.3151	137
252	A252	0.0779	0.4032	0.3253	145
253	A253	0.2415	0.4635	0.222	56
254	A254	-0.0598	0.313	0.3728	242
255	A255	0.1038	0.3764	0.2726	130
256	A256	0.0877	0.3699	0.2822	140
257	A257	0.2319	0.4432	0.2112	62
258	A258	-0.0688	0.2928	0.3616	249
259	A259	0.0947	0.3561	0.2614	135
260	A260	0.0684	0.3429	0.2746	151
261	A261	0.1539	0.396	0.2421	97
262	A262	-0.1469	0.2456	0.3925	296
263	A263	0.0167	0.3089	0.2922	184
264	A264	-0.0097	0.2957	0.3054	200
265	A265	0.0648	0.3502	0.2854	152
266	A266	-0.2359	0.1998	0.4358	346
267	A267	-0.0724	0.2631	0.3355	253
268	A268	-0.1051	0.2469	0.3521	270
269	A269	0.0041	0.321	0.3169	193
270	A270	-0.2967	0.1706	0.4673	367
271	A271	-0.1331	0.2339	0.3671	289
272	A272	-0.1595	0.2207	0.3802	304
273	A273	-0.0494	0.3011	0.3505	235
274	A274	-0.3452	0.1518	0.497	383
275	A275	-0.1817	0.2151	0.3968	319
276	A276	-0.213	0.2008	0.4138	335
277	A277	-0.1075	0.2901	0.3976	273
278	A278	-0.4082	0.1397	0.5479	392
279	A279	-0.2447	0.203	0.4477	349
280	A280	-0.2671	0.1902	0.4574	358
281	A281	-0.1404	0.3319	0.4722	291
282	A282	-0.4411	0.1815	0.6226	394
283	A283	-0.2775	0.2448	0.5223	362
284	A284	-0.3039	0.2316	0.5355	368
285	A285	0.0897	0.4172	0.3275	139
286	A286	-0.2047	0.2704	0.4751	331
287	A287	-0.0411	0.3337	0.3748	228
288	A288	-0.0611	0.324	0.3851	243
289	A289	0.2023	0.4837	0.2814	70
290	A290	-0.111	0.3238	0.4348	277
291	A291	0.0525	0.3871	0.3346	160
292	A292	0.0389	0.3836	0.3446	169
293	A293	0.2017	0.4435	0.2418	71
294	A294	-0.1045	0.2898	0.3942	269
295	A295	0.0591	0.3531	0.294	156
296	A296	0.0333	0.34	0.3068	172
297	A297	0.1859	0.4198	0.2338	77
298	A298	-0.1149	0.2694	0.3843	279
299	A299	0.0487	0.3327	0.284	161
300	A300	0.0224	0.3195	0.2972	178
301	A301	0.1067	0.3723	0.2656	128
302	A302	-0.194	0.2219	0.4159	324
303	A303	-0.0304	0.2853	0.3157	221
304	A304	-0.0497	0.2757	0.3254	236
305	A305	0.0183	0.3271	0.3088	183
306	A306	-0.276	0.1798	0.4558	361
307	A307	-0.1125	0.2431	0.3556	278
308	A308	-0.1452	0.2269	0.3721	294
309	A309	-0.0416	0.2988	0.3404	229
310	A310	-0.3368	0.1506	0.4874	379
311	A311	-0.1732	0.2139	0.3871	310
312	A312	-0.1996	0.2007	0.4003	327
313	A313	-0.0943	0.2801	0.3744	263
314	A314	-0.3903	0.1306	0.5209	389
315	A315	-0.2267	0.194	0.4206	342
316	A316	-0.2531	0.1808	0.4338	351
317	A317	-0.1476	0.27	0.4176	297
318	A318	-0.4483	0.1197	0.568	395
319	A319	-0.2848	0.183	0.4677	363
320	A320	-0.3072	0.1702	0.4774	370
321	A321	-0.1726	0.3189	0.4916	308
322	A322	-0.4734	0.1686	0.642	397
323	A323	-0.3098	0.2319	0.5417	372
324	A324	-0.3362	0.2187	0.5549	378
325	A325	0.0441	0.3969	0.3528	165
326	A326	-0.2357	0.2585	0.4942	345
327	A327	-0.0721	0.3218	0.3939	252
328	A328	-0.0862	0.3152	0.4014	260
329	A329	0.1525	0.4576	0.3051	99
330	A330	-0.1764	0.2865	0.4629	313
331	A331	-0.0128	0.3498	0.3626	204
332	A332	-0.0194	0.3506	0.37	214
333	A333	0.1578	0.4234	0.2656	93
334	A334	-0.1429	0.2731	0.4159	293
335	A335	0.0207	0.3364	0.3157	180
336	A336	-0.0049	0.3234	0.3283	198
337	A337	0.1525	0.4064	0.2539	98
338	A338	-0.1482	0.256	0.4043	298
339	A339	0.0153	0.3193	0.304	185
340	A340	-0.017	0.3028	0.3198	211
341	A341	0.0733	0.359	0.2856	148
342	A342	-0.2274	0.2086	0.436	343
343	A343	-0.0639	0.2719	0.3357	247
344	A344	-0.0831	0.2623	0.3454	257
345	A345	-0.0151	0.3138	0.3289	210
346	A346	-0.3095	0.1664	0.4759	371
347	A347	-0.1459	0.2297	0.3756	295
348	A348	-0.1786	0.2135	0.3922	316
349	A349	-0.075	0.2855	0.3604	254
350	A350	-0.3757	0.1351	0.5108	388
351	A351	-0.2122	0.1984	0.4106	334
352	A352	-0.233	0.1873	0.4203	344
353	A353	-0.1278	0.2667	0.3945	285
354	A354	-0.4285	0.1163	0.5448	393
355	A355	-0.2649	0.1797	0.4446	354
356	A356	-0.2865	0.1674	0.4539	365
357	A357	-0.181	0.2567	0.4377	318
358	A358	-0.4817	0.1063	0.588	398
359	A359	-0.3182	0.1696	0.4878	374
360	A360	-0.3446	0.1564	0.501	381
361	A361	-0.1981	0.3128	0.5109	326
362	A362	-0.4988	0.1625	0.6613	399
363	A363	-0.3353	0.2258	0.5611	377
364	A364	-0.3617	0.2126	0.5742	384
365	A365	0.0194	0.3915	0.3721	182
366	A366	-0.2736	0.2456	0.5192	360
367	A367	-0.1101	0.3089	0.419	276
368	A368	-0.1308	0.2988	0.4297	288
369	A369	0.1033	0.4337	0.3304	131
370	A370	-0.2017	0.2803	0.482	329
371	A371	-0.0381	0.3436	0.3818	225
372	A372	-0.0452	0.3443	0.3895	233
373	A373	0.1259	0.4135	0.2876	113
374	A374	-0.174	0.2633	0.4373	311
375	A375	-0.0105	0.3266	0.3371	201
376	A376	-0.0368	0.3135	0.3502	223
377	A377	0.1196	0.3963	0.2767	120
378	A378	-0.187	0.2428	0.4298	321
379	A379	-0.0235	0.3061	0.3296	216
380	A380	-0.0438	0.2961	0.3399	231
381	A381	0.0396	0.3488	0.3091	168
382	A382	-0.2611	0.1984	0.4595	353
383	A383	-0.0976	0.2617	0.3593	264
384	A384	-0.1098	0.2557	0.3655	275
385	A385	-0.0418	0.3071	0.3489	230
386	A386	-0.3426	0.1567	0.4993	380
387	A387	-0.179	0.22	0.399	317
388	A388	-0.2054	0.2068	0.4122	332
389	A389	-0.1017	0.2788	0.3805	267
390	A390	-0.4025	0.1284	0.5309	391
391	A391	-0.2389	0.1917	0.4306	348
392	A392	-0.2653	0.1785	0.4438	357
393	A393	-0.164	0.2586	0.4226	307
394	A394	-0.46	0.1089	0.5689	396
395	A395	-0.2965	0.1722	0.4687	366
396	A396	-0.3132	0.1607	0.4739	373
397	A397	-0.2077	0.25	0.4577	333
398	A398	-0.5085	0.0996	0.6081	400
399	A399	-0.3449	0.1629	0.5078	382
400	A400	-0.3713	0.1497	0.521	387

## Sheet: real-linear-uncertainty
Scenario	Scenario1
Evaluations	Seeding Fraction	Average PP	Measure	Average Last Iteration	Average Coverage
action1	0.01	0.01	0.02	1	1
action2	0.01	0.01	3.69	1	1
action3	0.01	0.01	2.12	1	1
action4	0.01	0.01	0.03	1	1
action5	0.01	0.1	0.02	8.5	4.48
action6	0.01	0.1	3.69	8.4	4.65
action7	0.01	0.1	2.12	8.4	4.65
action8	0.01	0.1	0.03	9	2.93
action9	0.01	0.2	0.02	15	15.75
action10	0.01	0.2	3.69	14.6	16.5
action11	0.01	0.2	2.12	14.6	16.5
action12	0.01	0.2	0.03	21	14.87
action13	0.01	0.3	0.02	15.3	30.92
action14	0.01	0.3	3.69	14.5	31.04
action15	0.01	0.3	2.12	14.5	31.04
action16	0.01	0.3	0.03	17.3	30.78
action17	0.01	0.4	0.02	16.2	43.74
action18	0.01	0.4	3.69	14.2	43.63
action19	0.01	0.4	2.12	14.2	43.63
action20	0.01	0.4	0.03	17.6	43.73
action21	0.01	0.5	0.02	13.8	53.73
action22	0.01	0.5	3.69	13.1	53.55
action23	0.01	0.5	2.12	13.1	53.55
action24	0.01	0.5	0.03	15.1	53.73
action25	0.01	0.6	0.02	12.3	61.16
action26	0.01	0.6	3.69	11.2	60.84
action27	0.01	0.6	2.12	11.2	60.84
action28	0.01	0.6	0.03	14	61.16
action29	0.01	0.7	0.02	12.6	66.82
action30	0.01	0.7	3.69	11.4	66.5
action31	0.01	0.7	2.12	11.4	66.5
action32	0.01	0.7	0.03	13.8	66.82
action33	0.01	0.8	0.02	11.9	71.06
action34	0.01	0.8	3.69	10.8	70.75
action35	0.01	0.8	2.12	10.8	70.75
action36	0.01	0.8	0.03	13.2	71.06
action37	0.01	0.9	0.02	11.1	74.34
action38	0.01	0.9	3.69	10.4	74.02
action39	0.01	0.9	2.12	10.4	74.02
action40	0.01	0.9	0.03	12.1	74.34
action41	0.02	0.01	0.02	1	2
action42	0.02	0.01	3.69	1	2
action43	0.02	0.01	2.12	1	2
action44	0.02	0.01	0.03	1	2
action45	0.02	0.1	0.02	7.1	6.62
action46	0.02	0.1	3.69	7.5	6.85
action47	0.02	0.1	2.12	7.5	6.85
action48	0.02	0.1	0.03	8.3	4.26
action49	0.02	0.2	0.02	12.3	17.28
action50	0.02	0.2	3.69	12.2	17.95
action51	0.02	0.2	2.12	12.2	17.95
action52	0.02	0.2	0.03	18.1	15.08
action53	0.02	0.3	0.02	14.1	31.21
action54	0.02	0.3	3.69	13.1	31.59
action55	0.02	0.3	2.12	13.1	31.59
action56	0.02	0.3	0.03	16.5	30.81
action57	0.02	0.4	0.02	15.4	43.84
action58	0.02	0.4	3.69	13.5	43.83
action59	0.02	0.4	2.12	13.5	43.83
action60	0.02	0.4	0.03	17.1	43.74
action61	0.02	0.5	0.02	13.2	53.82
action62	0.02	0.5	3.69	12.4	53.65
action63	0.02	0.5	2.12	12.4	53.65
action64	0.02	0.5	0.03	14.4	53.73
action65	0.02	0.6	0.02	11.6	61.18
action66	0.02	0.6	3.69	10.7	60.88
action67	0.02	0.6	2.12	10.7	60.88
action68	0.02	0.6	0.03	13.7	61.16
action69	0.02	0.7	0.02	11.7	66.82
action70	0.02	0.7	3.69	11.1	66.5
action71	0.02	0.7	2.12	11.1	66.5
action72	0.02	0.7	0.03	13.3	66.82
action73	0.02	0.8	0.02	11	71.06
action74	0.02	0.8	3.69	10.3	70.75
action75	0.02	0.8	2.12	10.3	70.75
action76	0.02	0.8	0.03	12.7	71.06
action77	0.02	0.9	0.02	10.3	74.34
action78	0.02	0.9	3.69	9.7	74.02
action79	0.02	0.9	2.12	9.7	74.02
action80	0.02	0.9	0.03	11.8	74.34
action81	0.03	0.01	0.02	1	3
action82	0.03	0.01	3.69	1	3
action83	0.03	0.01	2.12	1	3
action84	0.03	0.01	0.03	1	3
action85	0.03	0.1	0.02	6.8	8.1
action86	0.03	0.1	3.69	7.6	8.77
action87	0.03	0.1	2.12	7.6	8.77
action88	0.03	0.1	0.03	7.6	5.57
action89	0.03	0.2	0.02	11.4	18.37
action90	0.03	0.2	3.69	10.3	19.8
action91	0.03	0.2	2.12	10.3	19.8
action92	0.03	0.2	0.03	17.1	15.86
action93	0.03	0.3	0.02	13.6	31.7
action94	0.03	0.3	3.69	11.9	32.63
action95	0.03	0.3	2.12	11.9	32.63
action96	0.03	0.3	0.03	15.5	30.97
action97	0.03	0.4	0.02	14.5	43.94
action98	0.03	0.4	3.69	12.9	44.36
action99	0.03	0.4	2.12	12.9	44.36
action100	0.03	0.4	0.03	16.7	43.8
action101	0.03	0.5	0.02	13	53.82
action102	0.03	0.5	3.69	11.7	53.84
action103	0.03	0.5	2.12	11.7	53.84
action104	0.03	0.5	0.03	14.2	53.76
action105	0.03	0.6	0.02	11.3	61.18
action106	0.03	0.6	3.69	10.4	60.93
action107	0.03	0.6	2.12	10.4	60.93
action108	0.03	0.6	0.03	12.7	61.17
action109	0.03	0.7	0.02	11.4	66.82
action110	0.03	0.7	3.69	10.3	66.53
action111	0.03	0.7	2.12	10.3	66.53
action112	0.03	0.7	0.03	12.6	66.82
action113	0.03	0.8	0.02	10.8	71.06
action114	0.03	0.8	3.69	9.5	70.75
action115	0.03	0.8	2.12	9.5	70.75
action116	0.03	0.8	0.03	12.1	71.06
action117	0.03	0.9	0.02	10.1	74.34
action118	0.03	0.9	3.69	8.9	74.02
action119	0.03	0.9	2.12	8.9	74.02
action120	0.03	0.9	0.03	11	74.34
action121	0.04	0.01	0.02	1	3.99
action122	0.04	0.01	3.69	1	3.99
action123	0.04	0.01	2.12	1	3.99
action124	0.04	0.01	0.03	1	3.99
action125	0.04	0.1	0.02	6.1	9.84
action126	0.04	0.1	3.69	7.1	10.24
action127	0.04	0.1	2.12	7.1	10.24
action128	0.04	0.1	0.03	7.6	6.75
action129	0.04	0.2	0.02	9.3	19.97
action130	0.04	0.2	3.69	9.4	21.07
action131	0.04	0.2	2.12	9.4	21.07
action132	0.04	0.2	0.03	15.4	16.42
action133	0.04	0.3	0.02	12.1	32.52
action134	0.04	0.3	3.69	11	33.55
action135	0.04	0.3	2.12	11	33.55
action136	0.04	0.3	0.03	15.4	31.19
action137	0.04	0.4	0.02	13.8	44.27
action138	0.04	0.4	3.69	12.3	44.85
action139	0.04	0.4	2.12	12.3	44.85
action140	0.04	0.4	0.03	16.3	43.91
action141	0.04	0.5	0.02	12.7	53.96
action142	0.04	0.5	3.69	11.3	54.23
action143	0.04	0.5	2.12	11.3	54.23
action144	0.04	0.5	0.03	14	53.84
action145	0.04	0.6	0.02	10.9	61.29
action146	0.04	0.6	3.69	10.1	61.19
action147	0.04	0.6	2.12	10.1	61.19
action148	0.04	0.6	0.03	12.6	61.22
action149	0.04	0.7	0.02	11.4	66.91
action150	0.04	0.7	3.69	10.1	66.68
action151	0.04	0.7	2.12	10.1	66.68
action152	0.04	0.7	0.03	12.3	66.83
action153	0.04	0.8	0.02	10.6	71.09
action154	0.04	0.8	3.69	9.2	70.83
action155	0.04	0.8	2.12	9.2	70.83
action156	0.04	0.8	0.03	11.9	71.07
action157	0.04	0.9	0.02	9.8	74.34
action158	0.04	0.9	3.69	8.4	74.06
action159	0.04	0.9	2.12	8.4	74.06
action160	0.04	0.9	0.03	10.8	74.35
action161	0.05	0.01	0.02	1	4.99
action162	0.05	0.01	3.69	1	4.99
action163	0.05	0.01	2.12	1	4.99
action164	0.05	0.01	0.03	1	4.99
action165	0.05	0.1	0.02	6.1	11.3
action166	0.05	0.1	3.69	6.9	11.79
action167	0.05	0.1	2.12	6.9	11.79
action168	0.05	0.1	0.03	7.1	7.93
action169	0.05	0.2	0.02	8.6	21.48
action170	0.05	0.2	3.69	8.6	22.57
action171	0.05	0.2	2.12	8.6	22.57
action172	0.05	0.2	0.03	13.9	17.16
action173	0.05	0.3	0.02	11.4	33.46
action174	0.05	0.3	3.69	10.8	34.76
action175	0.05	0.3	2.12	10.8	34.76
action176	0.05	0.3	0.03	14.9	31.45
action177	0.05	0.4	0.02	12	44.79
action178	0.05	0.4	3.69	10.9	45.64
action179	0.05	0.4	2.12	10.9	45.64
action180	0.05	0.4	0.03	16.1	44.04
action181	0.05	0.5	0.02	11.5	54.2
action182	0.05	0.5	3.69	10.3	54.63
action183	0.05	0.5	2.12	10.3	54.63
action184	0.05	0.5	0.03	13.7	53.92
action185	0.05	0.6	0.02	10.6	61.36
action186	0.05	0.6	3.69	9.2	61.37
action187	0.05	0.6	2.12	9.2	61.37
action188	0.05	0.6	0.03	12.4	61.25
action189	0.05	0.7	0.02	11	66.91
action190	0.05	0.7	3.69	9.1	66.83
action191	0.05	0.7	2.12	9.1	66.83
action192	0.05	0.7	0.03	12.3	66.85
action193	0.05	0.8	0.02	10.5	71.09
action194	0.05	0.8	3.69	8.7	70.86
action195	0.05	0.8	2.12	8.7	70.86
action196	0.05	0.8	0.03	11.6	71.08
action197	0.05	0.9	0.02	9.8	74.34
action198	0.05	0.9	3.69	8	74.06
action199	0.05	0.9	2.12	8	74.06
action200	0.05	0.9	0.03	10.5	74.35
action201	0.06	0.01	0.02	1	6.01
action202	0.06	0.01	3.69	1	6.01
action203	0.06	0.01	2.12	1	6.01
action204	0.06	0.01	0.03	1	6.01
action205	0.06	0.1	0.02	5.8	12.66
action206	0.06	0.1	3.69	6.5	13.22
action207	0.06	0.1	2.12	6.5	13.22
action208	0.06	0.1	0.03	7.2	9.16
action209	0.06	0.2	0.02	8.3	22.7
action210	0.06	0.2	3.69	8.1	24.07
action211	0.06	0.2	2.12	8.1	24.07
action212	0.06	0.2	0.03	13.7	17.95
action213	0.06	0.3	0.02	10.7	34.28
action214	0.06	0.3	3.69	10.1	35.84
action215	0.06	0.3	2.12	10.1	35.84
action216	0.06	0.3	0.03	14.5	31.79
action217	0.06	0.4	0.02	11.2	45.23
action218	0.06	0.4	3.69	10	46.21
action219	0.06	0.4	2.12	10	46.21
action220	0.06	0.4	0.03	16	44.27
action221	0.06	0.5	0.02	11	54.36
action222	0.06	0.5	3.69	10.1	54.98
action223	0.06	0.5	2.12	10.1	54.98
action224	0.06	0.5	0.03	13.5	54.04
action225	0.06	0.6	0.02	10.3	61.42
action226	0.06	0.6	3.69	9.2	61.53
action227	0.06	0.6	2.12	9.2	61.53
action228	0.06	0.6	0.03	12.4	61.31
action229	0.06	0.7	0.02	10.7	66.96
action230	0.06	0.7	3.69	8.8	66.94
action231	0.06	0.7	2.12	8.8	66.94
action232	0.06	0.7	0.03	12.3	66.87
action233	0.06	0.8	0.02	10	71.09
action234	0.06	0.8	3.69	8.6	70.91
action235	0.06	0.8	2.12	8.6	70.91
action236	0.06	0.8	0.03	11.6	71.08
action237	0.06	0.9	0.02	9.1	74.34
action238	0.06	0.9	3.69	7.8	74.09
action239	0.06	0.9	2.12	7.8	74.09
action240	0.06	0.9	0.03	10.5	74.35
action241	0.07	0.01	0.02	1	7
action242	0.07	0.01	3.69	1	7
action243	0.07	0.01	2.12	1	7
action244	0.07	0.01	0.03	1	7
action245	0.07	0.1	0.02	5.6	13.92
action246	0.07	0.1	3.69	6.6	14.46
action247	0.07	0.1	2.12	6.6	14.46
action248	0.07	0.1	0.03	7	10.11
action249	0.07	0.2	0.02	8.2	23.79
action250	0.07	0.2	3.69	8.3	25.19
action251	0.07	0.2	2.12	8.3	25.19
action252	0.07	0.2	0.03	13.4	18.55
action253	0.07	0.3	0.02	10.7	35.16
action254	0.07	0.3	3.69	9.7	36.55
action255	0.07	0.3	2.12	9.7	36.55
action256	0.07	0.3	0.03	14.5	32.12
action257	0.07	0.4	0.02	10.6	45.69
action258	0.07	0.4	3.69	9.5	46.63
action259	0.07	0.4	2.12	9.5	46.63
action260	0.07	0.4	0.03	16	44.48
action261	0.07	0.5	0.02	10.5	54.7
action262	0.07	0.5	3.69	9.5	55.23
action263	0.07	0.5	2.12	9.5	55.23
action264	0.07	0.5	0.03	13.5	54.19
action265	0.07	0.6	0.02	10	61.68
action266	0.07	0.6	3.69	9.1	61.67
action267	0.07	0.6	2.12	9.1	61.67
action268	0.07	0.6	0.03	12.3	61.42
action269	0.07	0.7	0.02	9.9	67.22
action270	0.07	0.7	3.69	8.7	67.01
action271	0.07	0.7	2.12	8.7	67.01
action272	0.07	0.7	0.03	12.3	66.94
action273	0.07	0.8	0.02	9	71.32
action274	0.07	0.8	3.69	8.3	70.96
action275	0.07	0.8	2.12	8.3	70.96
action276	0.07	0.8	0.03	11.6	71.13
action277	0.07	0.9	0.02	8.4	74.59
action278	0.07	0.9	3.69	7.6	74.09
action279	0.07	0.9	2.12	7.6	74.09
action280	0.07	0.9	0.03	10.5	74.38
action281	0.08	0.01	0.02	1	8
action282	0.08	0.01	3.69	1	8
action283	0.08	0.01	2.12	1	8
action284	0.08	0.01	0.03	1	8
action285	0.08	0.1	0.02	5.6	15.1
action286	0.08	0.1	3.69	6.4	15.68
action287	0.08	0.1	2.12	6.4	15.68
action288	0.08	0.1	0.03	7.1	11.16
action289	0.08	0.2	0.02	8	24.87
action290	0.08	0.2	3.69	7.8	26.32
action291	0.08	0.2	2.12	7.8	26.32
action292	0.08	0.2	0.03	12.9	19.37
action293	0.08	0.3	0.02	10.3	35.9
action294	0.08	0.3	3.69	9	37.37
action295	0.08	0.3	2.12	9	37.37
action296	0.08	0.3	0.03	14	32.57
action297	0.08	0.4	0.02	10.2	46.16
action298	0.08	0.4	3.69	8.7	47.1
action299	0.08	0.4	2.12	8.7	47.1
action300	0.08	0.4	0.03	15.6	44.76
action301	0.08	0.5	0.02	9.7	54.93
action302	0.08	0.5	3.69	8.5	55.46
action303	0.08	0.5	2.12	8.5	55.46
action304	0.08	0.5	0.03	13.4	54.35
action305	0.08	0.6	0.02	9.3	61.78
action306	0.08	0.6	3.69	8.5	61.85
action307	0.08	0.6	2.12	8.5	61.85
action308	0.08	0.6	0.03	11.9	61.54
action309	0.08	0.7	0.02	9.6	67.24
action310	0.08	0.7	3.69	8.2	67.1
action311	0.08	0.7	2.12	8.2	67.1
action312	0.08	0.7	0.03	12.2	67.01
action313	0.08	0.8	0.02	9	71.32
action314	0.08	0.8	3.69	7.6	71.06
action315	0.08	0.8	2.12	7.6	71.06
action316	0.08	0.8	0.03	11.6	71.18
action317	0.08	0.9	0.02	8.4	74.59
action318	0.08	0.9	3.69	7.1	74.13
action319	0.08	0.9	2.12	7.1	74.13
action320	0.08	0.9	0.03	10.4	74.4
action321	0.09	0.01	0.02	1	9
action322	0.09	0.01	3.69	1	9
action323	0.09	0.01	2.12	1	9
action324	0.09	0.01	0.03	1	9
action325	0.09	0.1	0.02	5.2	16.33
action326	0.09	0.1	3.69	6.4	16.82
action327	0.09	0.1	2.12	6.4	16.82
action328	0.09	0.1	0.03	7	12.14
action329	0.09	0.2	0.02	7.5	26
action330	0.09	0.2	3.69	7.7	27.34
action331	0.09	0.2	2.12	7.7	27.34
action332	0.09	0.2	0.03	12.7	20.2
action333	0.09	0.3	0.02	10.4	36.69
action334	0.09	0.3	3.69	8.5	38.15
action335	0.09	0.3	2.12	8.5	38.15
action336	0.09	0.3	0.03	13.9	33.03
action337	0.09	0.4	0.02	10	46.72
action338	0.09	0.4	3.69	8.2	47.74
action339	0.09	0.4	2.12	8.2	47.74
action340	0.09	0.4	0.03	15.5	45.04
action341	0.09	0.5	0.02	9.6	55.32
action342	0.09	0.5	3.69	8.2	55.87
action343	0.09	0.5	2.12	8.2	55.87
action344	0.09	0.5	0.03	13.3	54.51
action345	0.09	0.6	0.02	9.1	62.04
action346	0.09	0.6	3.69	8.3	62.15
action347	0.09	0.6	2.12	8.3	62.15
action348	0.09	0.6	0.03	11.9	61.66
action349	0.09	0.7	0.02	9.5	67.46
action350	0.09	0.7	3.69	8	67.34
action351	0.09	0.7	2.12	8	67.34
action352	0.09	0.7	0.03	12	67.07
action353	0.09	0.8	0.02	8.8	71.49
action354	0.09	0.8	3.69	7.5	71.17
action355	0.09	0.8	2.12	7.5	71.17
action356	0.09	0.8	0.03	11.5	71.22
action357	0.09	0.9	0.02	8.4	74.76
action358	0.09	0.9	3.69	6.9	74.18
action359	0.09	0.9	2.12	6.9	74.18
action360	0.09	0.9	0.03	10.4	74.42
action361	0.1	0.01	0.02	1	10
action362	0.1	0.01	3.69	1	10
action363	0.1	0.01	2.12	1	10
action364	0.1	0.01	0.03	1	10
action365	0.1	0.1	0.02	4.9	17.52
action366	0.1	0.1	3.69	6.3	17.93
action367	0.1	0.1	2.12	6.3	17.93
action368	0.1	0.1	0.03	6.9	13.14
action369	0.1	0.2	0.02	6.8	27.18
action370	0.1	0.2	3.69	7.7	28.43
action371	0.1	0.2	2.12	7.7	28.43
action372	0.1	0.2	0.03	12.7	21.01
action373	0.1	0.3	0.02	9.4	37.69
action374	0.1	0.3	3.69	8.2	39.08
action375	0.1	0.3	2.12	8.2	39.08
action376	0.1	0.3	0.03	13.6	33.59
action377	0.1	0.4	0.02	9.3	47.29
action378	0.1	0.4	3.69	8	48.35
action379	0.1	0.4	2.12	8	48.35
action380	0.1	0.4	0.03	15.3	45.39
action381	0.1	0.5	0.02	9.3	55.61
action382	0.1	0.5	3.69	8.1	56.31
action383	0.1	0.5	2.12	8.1	56.31
action384	0.1	0.5	0.03	13.2	54.73
action385	0.1	0.6	0.02	9	62.2
action386	0.1	0.6	3.69	8.2	62.38
action387	0.1	0.6	2.12	8.2	62.38
action388	0.1	0.6	0.03	11.7	61.8
action389	0.1	0.7	0.02	9.1	67.54
action390	0.1	0.7	3.69	7.6	67.46
action391	0.1	0.7	2.12	7.6	67.46
action392	0.1	0.7	0.03	11.9	67.14
action393	0.1	0.8	0.02	8.7	71.55
action394	0.1	0.8	3.69	7.2	71.2
action395	0.1	0.8	2.12	7.2	71.2
action396	0.1	0.8	0.03	11.5	71.27
action397	0.1	0.9	0.02	8	74.79
action398	0.1	0.9	3.69	6.8	74.19
action399	0.1	0.9	2.12	6.8	74.19
action400	0.1	0.9	0.03	10.4	74.45
Preferences	Seeding Fraction	Average PP	Measure	Average Last Iteration	Average Coverage
active	yes	yes	yes	yes	yes
Min/Max	min	min	min	max	max
Weight	1	1	1	1	1
Preference function	Linear	Linear	Linear	Linear	Linear
Thresholds	absolute	absolute	absolute	absolute	absolute
q	0.015	0.145	0.0009	1.9	12.07
p	0.03	0.29	0.0019	3.8	24.14
s	3	3	3	3	3
Unicriterion flows	Seeding Fraction	Average PP	Measure	Average Last Iteration	Average Coverage
action1	0.7352	0.7329	0.7519	-0.9023	-0.7743
action2	0.7352	0.7329	-0.7519	-0.9023	-0.7743
action3	0.7352	0.7329	-0.2506	-0.9023	-0.7743
action4	0.7352	0.7329	0.2506	-0.9023	-0.7743
action5	0.7352	0.6395	0.7519	-0.1952	-0.7432
action6	0.7352	0.6395	-0.7519	-0.2076	-0.7418
action7	0.7352	0.6395	-0.2506	-0.2076	-0.7418
action8	0.7352	0.6395	0.2506	-0.1309	-0.7566
action9	0.7352	0.5082	0.7519	0.7668	-0.6485
action10	0.7352	0.5082	-0.7519	0.7276	-0.6396
action11	0.7352	0.5082	-0.2506	0.7276	-0.6396
action12	0.7352	0.5082	0.2506	0.9982	-0.6586
action13	0.7352	0.3008	0.7519	0.7941	-0.352
action14	0.7352	0.3008	-0.7519	0.7169	-0.3488
action15	0.7352	0.3008	-0.2506	0.7169	-0.3488
action16	0.7352	0.3008	0.2506	0.9223	-0.3559
action17	0.7352	0.1003	0.7519	0.8631	-0.0604
action18	0.7352	0.1003	-0.7519	0.6829	-0.0631
action19	0.7352	0.1003	-0.2506	0.6829	-0.0631
action20	0.7352	0.1003	0.2506	0.9355	-0.0606
action21	0.7352	-0.1003	0.7519	0.6321	0.2413
action22	0.7352	-0.1003	-0.7519	0.5377	0.2353
action23	0.7352	-0.1003	-0.2506	0.5377	0.2353
action24	0.7352	-0.1003	0.2506	0.7762	0.2413
action25	0.7352	-0.3008	0.7519	0.4196	0.4225
action26	0.7352	-0.3008	-0.7519	0.23	0.4167
action27	0.7352	-0.3008	-0.2506	0.23	0.4167
action28	0.7352	-0.3008	0.2506	0.6584	0.4225
action29	0.7352	-0.5013	0.7519	0.4652	0.4836
action30	0.7352	-0.5013	-0.7519	0.268	0.4793
action31	0.7352	-0.5013	-0.2506	0.268	0.4793
action32	0.7352	-0.5013	0.2506	0.6321	0.4836
action33	0.7352	-0.6395	0.7519	0.3567	0.5373
action34	0.7352	-0.6395	-0.7519	0.156	0.5342
action35	0.7352	-0.6395	-0.2506	0.156	0.5342
action36	0.7352	-0.6395	0.2506	0.5514	0.5373
action37	0.7352	-0.7398	0.7519	0.2109	0.5724
action38	0.7352	-0.7398	-0.7519	0.0823	0.5673
action39	0.7352	-0.7398	-0.2506	0.0823	0.5673
action40	0.7352	-0.7398	0.2506	0.3894	0.5724
action41	0.6349	0.7329	0.7519	-0.9023	-0.7651
action42	0.6349	0.7329	-0.7519	-0.9023	-0.7651
action43	0.6349	0.7329	-0.2506	-0.9023	-0.7651
action44	0.6349	0.7329	0.2506	-0.9023	-0.7651
action45	0.6349	0.6395	0.7519	-0.3691	-0.7288
action46	0.6349	0.6395	-0.7519	-0.3203	-0.7275
action47	0.6349	0.6395	-0.2506	-0.3203	-0.7275
action48	0.6349	0.6395	0.2506	-0.2208	-0.745
action49	0.6349	0.5082	0.7519	0.4196	-0.6297
action50	0.6349	0.5082	-0.7519	0.4042	-0.6206
action51	0.6349	0.5082	-0.2506	0.4042	-0.6206
action52	0.6349	0.5082	0.2506	0.9524	-0.6563
action53	0.6349	0.3008	0.7519	0.6713	-0.3442
action54	0.6349	0.3008	-0.7519	0.5377	-0.3338
action55	0.6349	0.3008	-0.2506	0.5377	-0.3338
action56	0.6349	0.3008	0.2506	0.881	-0.3551
action57	0.6349	0.1003	0.7519	0.8025	-0.0579
action58	0.6349	0.1003	-0.7519	0.5923	-0.0581
action59	0.6349	0.1003	-0.2506	0.5923	-0.0581
action60	0.6349	0.1003	0.2506	0.9132	-0.0604
action61	0.6349	-0.1003	0.7519	0.5514	0.2443
action62	0.6349	-0.1003	-0.7519	0.4349	0.2387
action63	0.6349	-0.1003	-0.2506	0.4349	0.2387
action64	0.6349	-0.1003	0.2506	0.706	0.2413
action65	0.6349	-0.3008	0.7519	0.3039	0.4228
action66	0.6349	-0.3008	-0.7519	0.1373	0.4174
action67	0.6349	-0.3008	-0.2506	0.1373	0.4174
action68	0.6349	-0.3008	0.2506	0.6189	0.4225
action69	0.6349	-0.5013	0.7519	0.3217	0.4836
action70	0.6349	-0.5013	-0.7519	0.2109	0.4793
action71	0.6349	-0.5013	-0.2506	0.2109	0.4793
action72	0.6349	-0.5013	0.2506	0.565	0.4836
action73	0.6349	-0.6395	0.7519	0.1926	0.5373
action74	0.6349	-0.6395	-0.7519	0.0641	0.5342
action75	0.6349	-0.6395	-0.2506	0.0641	0.5342
action76	0.6349	-0.6395	0.2506	0.4798	0.5373
action77	0.6349	-0.7398	0.7519	0.0641	0.5724
action78	0.6349	-0.7398	-0.7519	-0.0335	0.5673
action79	0.6349	-0.7398	-0.2506	-0.0335	0.5673
action80	0.6349	-0.7398	0.2506	0.3398	0.5724
action81	0.5013	0.7329	0.7519	-0.9023	-0.7559
action82	0.5013	0.7329	-0.7519	-0.9023	-0.7559
action83	0.5013	0.7329	-0.2506	-0.9023	-0.7559
action84	0.5013	0.7329	0.2506	-0.9023	-0.7559
action85	0.5013	0.6395	0.7519	-0.4061	-0.7184
action86	0.5013	0.6395	-0.7519	-0.3081	-0.7133
action87	0.5013	0.6395	-0.2506	-0.3081	-0.7133
action88	0.5013	0.6395	0.2506	-0.3081	-0.7351
action89	0.5013	0.5082	0.7519	0.268	-0.6146
action90	0.5013	0.5082	-0.7519	0.0641	-0.5937
action91	0.5013	0.5082	-0.2506	0.0641	-0.5937
action92	0.5013	0.5082	0.2506	0.9132	-0.6473
action93	0.5013	0.3008	0.7519	0.6056	-0.3309
action94	0.5013	0.3008	-0.7519	0.3567	-0.3072
action95	0.5013	0.3008	-0.2506	0.3567	-0.3072
action96	0.5013	0.3008	0.2506	0.8107	-0.3507
action97	0.5013	0.1003	0.7519	0.7169	-0.0554
action98	0.5013	0.1003	-0.7519	0.5092	-0.0452
action99	0.5013	0.1003	-0.2506	0.5092	-0.0452
action100	0.5013	0.1003	0.2506	0.8926	-0.0589
action101	0.5013	-0.1003	0.7519	0.5237	0.2443
action102	0.5013	-0.1003	-0.7519	0.3217	0.245
action103	0.5013	-0.1003	-0.2506	0.3217	0.245
action104	0.5013	-0.1003	0.2506	0.6829	0.2423
action105	0.5013	-0.3008	0.7519	0.2493	0.4228
action106	0.5013	-0.3008	-0.7519	0.0823	0.4183
action107	0.5013	-0.3008	-0.2506	0.0823	0.4183
action108	0.5013	-0.3008	0.2506	0.4798	0.4226
action109	0.5013	-0.5013	0.7519	0.268	0.4836
action110	0.5013	-0.5013	-0.7519	0.0641	0.4797
action111	0.5013	-0.5013	-0.2506	0.0641	0.4797
action112	0.5013	-0.5013	0.2506	0.4652	0.4836
action113	0.5013	-0.6395	0.7519	0.156	0.5373
action114	0.5013	-0.6395	-0.7519	-0.0631	0.5342
action115	0.5013	-0.6395	-0.2506	-0.0631	0.5342
action116	0.5013	-0.6395	0.2506	0.3894	0.5373
action117	0.5013	-0.7398	0.7519	0.029	0.5724
action118	0.5013	-0.7398	-0.7519	-0.144	0.5673
action119	0.5013	-0.7398	-0.2506	-0.144	0.5673
action120	0.5013	-0.7398	0.2506	0.1926	0.5724
action121	0.3008	0.7329	0.7519	-0.9023	-0.7472
action122	0.3008	0.7329	-0.7519	-0.9023	-0.7472
action123	0.3008	0.7329	-0.2506	-0.9023	-0.7472
action124	0.3008	0.7329	0.2506	-0.9023	-0.7472
action125	0.3008	0.6395	0.7519	-0.4933	-0.7047
action126	0.3008	0.6395	-0.7519	-0.3691	-0.7013
action127	0.3008	0.6395	-0.2506	-0.3691	-0.7013
action128	0.3008	0.6395	0.2506	-0.3081	-0.7281
action129	0.3008	0.5082	0.7519	-0.0904	-0.591
action130	0.3008	0.5082	-0.7519	-0.0769	-0.5715
action131	0.3008	0.5082	-0.2506	-0.0769	-0.5715
action132	0.3008	0.5082	0.2506	0.8025	-0.6406
action133	0.3008	0.3008	0.7519	0.3894	-0.3099
action134	0.3008	0.3008	-0.7519	0.1926	-0.286
action135	0.3008	0.3008	-0.2506	0.1926	-0.286
action136	0.3008	0.3008	0.2506	0.8025	-0.3447
action137	0.3008	0.1003	0.7519	0.6321	-0.0473
action138	0.3008	0.1003	-0.7519	0.4196	-0.0333
action139	0.3008	0.1003	-0.2506	0.4196	-0.0333
action140	0.3008	0.1003	0.2506	0.8689	-0.0561
action141	0.3008	-0.1003	0.7519	0.4798	0.249
action142	0.3008	-0.1003	-0.7519	0.2493	0.2579
action143	0.3008	-0.1003	-0.2506	0.2493	0.2579
action144	0.3008	-0.1003	0.2506	0.6584	0.245
action145	0.3008	-0.3008	0.7519	0.1744	0.4248
action146	0.3008	-0.3008	-0.7519	0.029	0.423
action147	0.3008	-0.3008	-0.2506	0.029	0.423
action148	0.3008	-0.3008	0.2506	0.4652	0.4235
action149	0.3008	-0.5013	0.7519	0.268	0.4848
action150	0.3008	-0.5013	-0.7519	0.029	0.4817
action151	0.3008	-0.5013	-0.2506	0.029	0.4817
action152	0.3008	-0.5013	0.2506	0.4196	0.4837
action153	0.3008	-0.6395	0.7519	0.1186	0.5376
action154	0.3008	-0.6395	-0.7519	-0.1037	0.5351
action155	0.3008	-0.6395	-0.2506	-0.1037	0.5351
action156	0.3008	-0.6395	0.2506	0.3567	0.5374
action157	0.3008	-0.7398	0.7519	-0.0182	0.5724
action158	0.3008	-0.7398	-0.7519	-0.2076	0.568
action159	0.3008	-0.7398	-0.2506	-0.2076	0.568
action160	0.3008	-0.7398	0.2506	0.156	0.5725
action161	0.1003	0.7329	0.7519	-0.9023	-0.7393
action162	0.1003	0.7329	-0.7519	-0.9023	-0.7393
action163	0.1003	0.7329	-0.2506	-0.9023	-0.7393
action164	0.1003	0.7329	0.2506	-0.9023	-0.7393
action165	0.1003	0.6395	0.7519	-0.4933	-0.6924
action166	0.1003	0.6395	-0.7519	-0.3941	-0.6882
action167	0.1003	0.6395	-0.2506	-0.3941	-0.6882
action168	0.1003	0.6395	0.2506	-0.3691	-0.7197
action169	0.1003	0.5082	0.7519	-0.1824	-0.5634
action170	0.1003	0.5082	-0.7519	-0.1824	-0.5409
action171	0.1003	0.5082	-0.2506	-0.1824	-0.5409
action172	0.1003	0.5082	0.2506	0.6457	-0.6313
action173	0.1003	0.3008	0.7519	0.268	-0.288
action174	0.1003	0.3008	-0.7519	0.156	-0.261
action175	0.1003	0.3008	-0.2506	0.156	-0.261
action176	0.1003	0.3008	0.2506	0.7576	-0.3377
action177	0.1003	0.1003	0.7519	0.3733	-0.0348
action178	0.1003	0.1003	-0.7519	0.1744	-0.0139
action179	0.1003	0.1003	-0.2506	0.1744	-0.0139
action180	0.1003	0.1003	0.2506	0.8566	-0.0529
action181	0.1003	-0.1003	0.7519	0.2861	0.2569
action182	0.1003	-0.1003	-0.7519	0.0641	0.271
action183	0.1003	-0.1003	-0.2506	0.0641	0.271
action184	0.1003	-0.1003	0.2506	0.6189	0.2476
action185	0.1003	-0.3008	0.7519	0.1186	0.4261
action186	0.1003	-0.3008	-0.7519	-0.1037	0.4263
action187	0.1003	-0.3008	-0.2506	-0.1037	0.4263
action188	0.1003	-0.3008	0.2506	0.4349	0.4241
action189	0.1003	-0.5013	0.7519	0.1926	0.4848
action190	0.1003	-0.5013	-0.7519	-0.1173	0.4837
action191	0.1003	-0.5013	-0.2506	-0.1173	0.4837
action192	0.1003	-0.5013	0.2506	0.4196	0.484
action193	0.1003	-0.6395	0.7519	0.1004	0.5376
action194	0.1003	-0.6395	-0.7519	-0.1698	0.5354
action195	0.1003	-0.6395	-0.2506	-0.1698	0.5354
action196	0.1003	-0.6395	0.2506	0.3039	0.5375
action197	0.1003	-0.7398	0.7519	-0.0182	0.5724
action198	0.1003	-0.7398	-0.7519	-0.2591	0.568
action199	0.1003	-0.7398	-0.2506	-0.2591	0.568
action200	0.1003	-0.7398	0.2506	0.1004	0.5725
action201	-0.1003	0.7329	0.7519	-0.9023	-0.7322
action202	-0.1003	0.7329	-0.7519	-0.9023	-0.7322
action203	-0.1003	0.7329	-0.2506	-0.9023	-0.7322
action204	-0.1003	0.7329	0.2506	-0.9023	-0.7322
action205	-0.1003	0.6395	0.7519	-0.5338	-0.6806
action206	-0.1003	0.6395	-0.7519	-0.4432	-0.6755
action207	-0.1003	0.6395	-0.2506	-0.4432	-0.6755
action208	-0.1003	0.6395	0.2506	-0.3565	-0.7102
action209	-0.1003	0.5082	0.7519	-0.2208	-0.538
action210	-0.1003	0.5082	-0.7519	-0.2463	-0.507
action211	-0.1003	0.5082	-0.2506	-0.2463	-0.507
action212	-0.1003	0.5082	0.2506	0.6189	-0.6206
action213	-0.1003	0.3008	0.7519	0.1373	-0.2703
action214	-0.1003	0.3008	-0.7519	0.029	-0.2406
action215	-0.1003	0.3008	-0.2506	0.029	-0.2406
action216	-0.1003	0.3008	0.2506	0.7169	-0.3285
action217	-0.1003	0.1003	0.7519	0.23	-0.0239
action218	-0.1003	0.1003	-0.7519	0.0129	0.0003
action219	-0.1003	0.1003	-0.2506	0.0129	0.0003
action220	-0.1003	0.1003	0.2506	0.8494	-0.0473
action221	-0.1003	-0.1003	0.7519	0.1926	0.2622
action222	-0.1003	-0.1003	-0.7519	0.029	0.2813
action223	-0.1003	-0.1003	-0.2506	0.029	0.2813
action224	-0.1003	-0.1003	0.2506	0.5923	0.2516
action225	-0.1003	-0.3008	0.7519	0.0641	0.4272
action226	-0.1003	-0.3008	-0.7519	-0.1037	0.4291
action227	-0.1003	-0.3008	-0.2506	-0.1037	0.4291
action228	-0.1003	-0.3008	0.2506	0.4349	0.4252
action229	-0.1003	-0.5013	0.7519	0.1373	0.4855
action230	-0.1003	-0.5013	-0.7519	-0.1571	0.4852
action231	-0.1003	-0.5013	-0.2506	-0.1571	0.4852
action232	-0.1003	-0.5013	0.2506	0.4196	0.4842
action233	-0.1003	-0.6395	0.7519	0.0129	0.5376
action234	-0.1003	-0.6395	-0.7519	-0.1824	0.5358
action235	-0.1003	-0.6395	-0.2506	-0.1824	0.5358
action236	-0.1003	-0.6395	0.2506	0.3039	0.5375
action237	-0.1003	-0.7398	0.7519	-0.1173	0.5724
action238	-0.1003	-0.7398	-0.7519	-0.2839	0.5684
action239	-0.1003	-0.7398	-0.2506	-0.2839	0.5684
action240	-0.1003	-0.7398	0.2506	0.1004	0.5725
action241	-0.3008	0.7329	0.7519	-0.9023	-0.7265
action242	-0.3008	0.7329	-0.7519	-0.9023	-0.7265
action243	-0.3008	0.7329	-0.2506	-0.9023	-0.7265
action244	-0.3008	0.7329	0.2506	-0.9023	-0.7265
action245	-0.3008	0.6395	0.7519	-0.5614	-0.6686
action246	-0.3008	0.6395	-0.7519	-0.4309	-0.6629
action247	-0.3008	0.6395	-0.2506	-0.4309	-0.6629
action248	-0.3008	0.6395	0.2506	-0.3819	-0.7024
action249	-0.3008	0.5082	0.7519	-0.2332	-0.5134
action250	-0.3008	0.5082	-0.7519	-0.2208	-0.4809
action251	-0.3008	0.5082	-0.2506	-0.2208	-0.4809
action252	-0.3008	0.5082	0.2506	0.5787	-0.6119
action253	-0.3008	0.3008	0.7519	0.1373	-0.2532
action254	-0.3008	0.3008	-0.7519	-0.0335	-0.2279
action255	-0.3008	0.3008	-0.2506	-0.0335	-0.2279
action256	-0.3008	0.3008	0.2506	0.7169	-0.3199
action257	-0.3008	0.1003	0.7519	0.1186	-0.0127
action258	-0.3008	0.1003	-0.7519	-0.0631	0.0108
action259	-0.3008	0.1003	-0.2506	-0.0631	0.0108
action260	-0.3008	0.1003	0.2506	0.8494	-0.0423
action261	-0.3008	-0.1003	0.7519	0.1004	0.2732
action262	-0.3008	-0.1003	-0.7519	-0.0631	0.2878
action263	-0.3008	-0.1003	-0.2506	-0.0631	0.2878
action264	-0.3008	-0.1003	0.2506	0.5923	0.2566
action265	-0.3008	-0.3008	0.7519	0.0129	0.4318
action266	-0.3008	-0.3008	-0.7519	-0.1173	0.4316
action267	-0.3008	-0.3008	-0.2506	-0.1173	0.4316
action268	-0.3008	-0.3008	0.2506	0.4196	0.4272
action269	-0.3008	-0.5013	0.7519	-0.0032	0.4892
action270	-0.3008	-0.5013	-0.7519	-0.1698	0.4862
action271	-0.3008	-0.5013	-0.2506	-0.1698	0.4862
action272	-0.3008	-0.5013	0.2506	0.4196	0.4852
action273	-0.3008	-0.6395	0.7519	-0.1309	0.5398
action274	-0.3008	-0.6395	-0.7519	-0.2208	0.5363
action275	-0.3008	-0.6395	-0.2506	-0.2208	0.5363
action276	-0.3008	-0.6395	0.2506	0.3039	0.538
action277	-0.3008	-0.7398	0.7519	-0.2076	0.5765
action278	-0.3008	-0.7398	-0.7519	-0.3081	0.5684
action279	-0.3008	-0.7398	-0.2506	-0.3081	0.5684
action280	-0.3008	-0.7398	0.2506	0.1004	0.573
action281	-0.5013	0.7329	0.7519	-0.9023	-0.7192
action282	-0.5013	0.7329	-0.7519	-0.9023	-0.7192
action283	-0.5013	0.7329	-0.2506	-0.9023	-0.7192
action284	-0.5013	0.7329	0.2506	-0.9023	-0.7192
action285	-0.5013	0.6395	0.7519	-0.5614	-0.656
action286	-0.5013	0.6395	-0.7519	-0.455	-0.6493
action287	-0.5013	0.6395	-0.2506	-0.455	-0.6493
action288	-0.5013	0.6395	0.2506	-0.3691	-0.6936
action289	-0.5013	0.5082	0.7519	-0.2591	-0.4883
action290	-0.5013	0.5082	-0.7519	-0.2839	-0.4557
action291	-0.5013	0.5082	-0.2506	-0.2839	-0.4557
action292	-0.5013	0.5082	0.2506	0.5092	-0.6001
action293	-0.5013	0.3008	0.7519	0.0641	-0.2396
action294	-0.5013	0.3008	-0.7519	-0.1309	-0.2118
action295	-0.5013	0.3008	-0.2506	-0.1309	-0.2118
action296	-0.5013	0.3008	0.2506	0.6584	-0.3087
action297	-0.5013	0.1003	0.7519	0.0463	-0.001
action298	-0.5013	0.1003	-0.7519	-0.1698	0.0243
action299	-0.5013	0.1003	-0.2506	-0.1698	0.0243
action300	-0.5013	0.1003	0.2506	0.8186	-0.0355
action301	-0.5013	-0.1003	0.7519	-0.0335	0.28
action302	-0.5013	-0.1003	-0.7519	-0.1952	0.2934
action303	-0.5013	-0.1003	-0.2506	-0.1952	0.2934
action304	-0.5013	-0.1003	0.2506	0.5787	0.2619
action305	-0.5013	-0.3008	0.7519	-0.0904	0.4335
action306	-0.5013	-0.3008	-0.7519	-0.1952	0.4348
action307	-0.5013	-0.3008	-0.2506	-0.1952	0.4348
action308	-0.5013	-0.3008	0.2506	0.3567	0.4293
action309	-0.5013	-0.5013	0.7519	-0.0484	0.4895
action310	-0.5013	-0.5013	-0.7519	-0.2332	0.4875
action311	-0.5013	-0.5013	-0.2506	-0.2332	0.4875
action312	-0.5013	-0.5013	0.2506	0.4042	0.4862
action313	-0.5013	-0.6395	0.7519	-0.1309	0.5398
action314	-0.5013	-0.6395	-0.7519	-0.3081	0.5373
action315	-0.5013	-0.6395	-0.2506	-0.3081	0.5373
action316	-0.5013	-0.6395	0.2506	0.3039	0.5385
action317	-0.5013	-0.7398	0.7519	-0.2076	0.5765
action318	-0.5013	-0.7398	-0.7519	-0.3691	0.569
action319	-0.5013	-0.7398	-0.2506	-0.3691	0.569
action320	-0.5013	-0.7398	0.2506	0.0823	0.5733
action321	-0.6349	0.7329	0.7519	-0.9023	-0.7114
action322	-0.6349	0.7329	-0.7519	-0.9023	-0.7114
action323	-0.6349	0.7329	-0.2506	-0.9023	-0.7114
action324	-0.6349	0.7329	0.2506	-0.9023	-0.7114
action325	-0.6349	0.6395	0.7519	-0.6147	-0.6417
action326	-0.6349	0.6395	-0.7519	-0.455	-0.6357
action327	-0.6349	0.6395	-0.2506	-0.455	-0.6357
action328	-0.6349	0.6395	0.2506	-0.3819	-0.6852
action329	-0.6349	0.5082	0.7519	-0.3203	-0.4627
action330	-0.6349	0.5082	-0.7519	-0.2961	-0.4337
action331	-0.6349	0.5082	-0.2506	-0.2961	-0.4337
action332	-0.6349	0.5082	0.2506	0.4798	-0.5872
action333	-0.6349	0.3008	0.7519	0.0823	-0.2255
action334	-0.6349	0.3008	-0.7519	-0.1952	-0.193
action335	-0.6349	0.3008	-0.2506	-0.1952	-0.193
action336	-0.6349	0.3008	0.2506	0.6457	-0.2977
action337	-0.6349	0.1003	0.7519	0.0129	0.0132
action338	-0.6349	0.1003	-0.7519	-0.2332	0.0455
action339	-0.6349	0.1003	-0.2506	-0.2332	0.0455
action340	-0.6349	0.1003	0.2506	0.8107	-0.0286
action341	-0.6349	-0.1003	0.7519	-0.0484	0.29
action342	-0.6349	-0.1003	-0.7519	-0.2332	0.3029
action343	-0.6349	-0.1003	-0.2506	-0.2332	0.3029
action344	-0.6349	-0.1003	0.2506	0.565	0.2671
action345	-0.6349	-0.3008	0.7519	-0.1173	0.4379
action346	-0.6349	-0.3008	-0.7519	-0.2208	0.4395
action347	-0.6349	-0.3008	-0.2506	-0.2208	0.4395
action348	-0.6349	-0.3008	0.2506	0.3567	0.4314
action349	-0.6349	-0.5013	0.7519	-0.0631	0.4928
action350	-0.6349	-0.5013	-0.7519	-0.2591	0.491
action351	-0.6349	-0.5013	-0.2506	-0.2591	0.491
action352	-0.6349	-0.5013	0.2506	0.3733	0.4871
action353	-0.6349	-0.6395	0.7519	-0.1571	0.5414
action354	-0.6349	-0.6395	-0.7519	-0.3203	0.5384
action355	-0.6349	-0.6395	-0.2506	-0.3203	0.5384
action356	-0.6349	-0.6395	0.2506	0.2861	0.5389
action357	-0.6349	-0.7398	0.7519	-0.2076	0.5793
action358	-0.6349	-0.7398	-0.7519	-0.3941	0.5698
action359	-0.6349	-0.7398	-0.2506	-0.3941	0.5698
action360	-0.6349	-0.7398	0.2506	0.0823	0.5737
action361	-0.7352	0.7329	0.7519	-0.9023	-0.7034
action362	-0.7352	0.7329	-0.7519	-0.9023	-0.7034
action363	-0.7352	0.7329	-0.2506	-0.9023	-0.7034
action364	-0.7352	0.7329	0.2506	-0.9023	-0.7034
action365	-0.7352	0.6395	0.7519	-0.6526	-0.6264
action366	-0.7352	0.6395	-0.7519	-0.4676	-0.6208
action367	-0.7352	0.6395	-0.2506	-0.4676	-0.6208
action368	-0.7352	0.6395	0.2506	-0.3941	-0.6763
action369	-0.7352	0.5082	0.7519	-0.4061	-0.4371
action370	-0.7352	0.5082	-0.7519	-0.2961	-0.4106
action371	-0.7352	0.5082	-0.2506	-0.2961	-0.4106
action372	-0.7352	0.5082	0.2506	0.4798	-0.5726
action373	-0.7352	0.3008	0.7519	-0.0769	-0.2044
action374	-0.7352	0.3008	-0.7519	-0.2332	-0.169
action375	-0.7352	0.3008	-0.2506	-0.2332	-0.169
action376	-0.7352	0.3008	0.2506	0.6056	-0.2851
action377	-0.7352	0.1003	0.7519	-0.0904	0.0305
action378	-0.7352	0.1003	-0.7519	-0.2591	0.066
action379	-0.7352	0.1003	-0.2506	-0.2591	0.066
action380	-0.7352	0.1003	0.2506	0.7941	-0.02
action381	-0.7352	-0.1003	0.7519	-0.0904	0.2968
action382	-0.7352	-0.1003	-0.7519	-0.2463	0.3136
action383	-0.7352	-0.1003	-0.2506	-0.2463	0.3136
action384	-0.7352	-0.1003	0.2506	0.5514	0.2741
action385	-0.7352	-0.3008	0.7519	-0.1309	0.4401
action386	-0.7352	-0.3008	-0.7519	-0.2332	0.4422
action387	-0.7352	-0.3008	-0.2506	-0.2332	0.4422
action388	-0.7352	-0.3008	0.2506	0.3217	0.4339
action389	-0.7352	-0.5013	0.7519	-0.1173	0.494
action390	-0.7352	-0.5013	-0.7519	-0.3081	0.4928
action391	-0.7352	-0.5013	-0.2506	-0.3081	0.4928
action392	-0.7352	-0.5013	0.2506	0.3567	0.4881
action393	-0.7352	-0.6395	0.7519	-0.1698	0.5419
action394	-0.7352	-0.6395	-0.7519	-0.3565	0.5387
action395	-0.7352	-0.6395	-0.2506	-0.3565	0.5387
action396	-0.7352	-0.6395	0.2506	0.2861	0.5393
action397	-0.7352	-0.7398	0.7519	-0.2591	0.5798
action398	-0.7352	-0.7398	-0.7519	-0.4061	0.57
action399	-0.7352	-0.7398	-0.2506	-0.4061	0.57
action400	-0.7352	-0.7398	0.2506	0.0823	0.5742
Multicriteria flows	Phi	Phi+	Phi-
action17	0.478	0.5942	0.1162
action21	0.452	0.5481	0.0961
action57	0.4463	0.5625	0.1162
action13	0.446	0.5774	0.1314
action9	0.4227	0.5607	0.138
action61	0.4164	0.5142	0.0978
action25	0.4057	0.5055	0.0999
action97	0.403	0.5267	0.1237
action53	0.4029	0.5355	0.1325
action20	0.3922	0.5585	0.1663
action29	0.3869	0.5033	0.1164
action101	0.3842	0.4895	0.1053
action24	0.3806	0.5242	0.1436
action16	0.3706	0.5522	0.1816
action60	0.3677	0.5341	0.1664
action12	0.3667	0.5552	0.1885
action93	0.3657	0.5049	0.1391
action65	0.3626	0.4676	0.105
action28	0.3532	0.4959	0.1427
action33	0.3483	0.4892	0.1409
action137	0.3475	0.4919	0.1444
action64	0.3465	0.4912	0.1447
action56	0.3425	0.524	0.1815
action69	0.3382	0.4607	0.1226
action52	0.338	0.5263	0.1884
action100	0.3372	0.51	0.1728
action49	0.337	0.4815	0.1445
action141	0.3362	0.4623	0.1261
action68	0.3252	0.4688	0.1436
action105	0.3249	0.4394	0.1145
action32	0.32	0.4817	0.1617
action104	0.3154	0.467	0.1517
action37	0.3061	0.4745	0.1683
action92	0.3052	0.4991	0.1939
action96	0.3025	0.4905	0.188
action109	0.3007	0.4326	0.1319
action73	0.2954	0.4448	0.1494
action140	0.2929	0.4854	0.1925
action36	0.287	0.4709	0.1839
action133	0.2866	0.4508	0.1643
action72	0.2866	0.45	0.1634
action89	0.283	0.4394	0.1564
action144	0.2709	0.4427	0.1718
action108	0.2707	0.4251	0.1544
action145	0.2702	0.4089	0.1387
action136	0.262	0.4694	0.2074
action113	0.2614	0.4198	0.1584
action149	0.2608	0.4128	0.1519
action181	0.259	0.4123	0.1533
action177	0.2582	0.4294	0.1713
action77	0.2567	0.4347	0.178
action76	0.2526	0.4387	0.1861
action180	0.251	0.4631	0.2121
action132	0.2443	0.4576	0.2133
action40	0.2416	0.4512	0.2097
action19	0.2409	0.4599	0.219
action112	0.2399	0.4131	0.1732
action5	0.2376	0.4476	0.21
action23	0.2315	0.4313	0.1998
action15	0.2307	0.4631	0.2325
action148	0.2279	0.4027	0.1748
action173	0.2266	0.4144	0.1878
action184	0.2234	0.4158	0.1923
action117	0.2229	0.4106	0.1877
action185	0.2192	0.3814	0.1622
action11	0.2161	0.4537	0.2375
action176	0.2143	0.4415	0.2272
action153	0.2139	0.3947	0.1809
action80	0.2116	0.4235	0.2119
action220	0.2105	0.442	0.2314
action116	0.2078	0.4041	0.1963
action189	0.2057	0.3818	0.1761
action59	0.2037	0.424	0.2203
action221	0.2012	0.3788	0.1776
action217	0.1916	0.3885	0.1969
action63	0.1915	0.3943	0.2028
action152	0.1907	0.3857	0.1951
action45	0.1857	0.4254	0.2397
action188	0.1818	0.3779	0.196
action224	0.1788	0.3912	0.2124
action55	0.1778	0.4128	0.235
action129	0.1759	0.3786	0.2027
action172	0.1747	0.4094	0.2347
action157	0.1734	0.3857	0.2123
action260	0.1714	0.4222	0.2508
action193	0.1701	0.3722	0.2021
action225	0.1684	0.3544	0.186
action216	0.1679	0.4148	0.2469
action27	0.1661	0.3757	0.2096
action213	0.1639	0.3776	0.2137
action99	0.163	0.3907	0.2277
action156	0.1612	0.379	0.2178
action120	0.1554	0.3817	0.2262
action229	0.1546	0.3544	0.1997
action85	0.1536	0.4053	0.2516
action192	0.1506	0.3657	0.2151
action8	0.1476	0.4003	0.2527
action31	0.1461	0.3716	0.2255
action261	0.1449	0.3468	0.2019
action103	0.1434	0.3569	0.2135
action228	0.1419	0.3579	0.216
action18	0.1407	0.4097	0.2691
action264	0.1397	0.3714	0.2317
action51	0.1352	0.3795	0.2443
action197	0.1333	0.3657	0.2324
action257	0.1315	0.3538	0.2223
action212	0.1314	0.3854	0.254
action22	0.1312	0.3811	0.2499
action14	0.1304	0.413	0.2826
action256	0.1295	0.3955	0.266
action67	0.1277	0.3429	0.2153
action253	0.1272	0.3592	0.232
action300	0.1265	0.3966	0.27
action169	0.1229	0.3563	0.2334
action95	0.1202	0.3658	0.2456
action265	0.119	0.3291	0.21
action10	0.1159	0.4036	0.2877
action71	0.1147	0.3432	0.2285
action233	0.1125	0.3418	0.2292
action48	0.1119	0.3767	0.2648
action232	0.1106	0.3458	0.2352
action196	0.1106	0.3509	0.2404
action1	0.1087	0.444	0.3353
action160	0.108	0.3566	0.2486
action139	0.1073	0.3567	0.2493
action35	0.1071	0.359	0.252
action58	0.1035	0.3739	0.2704
action340	0.0996	0.3888	0.2892
action268	0.0992	0.3356	0.2364
action125	0.0988	0.3852	0.2864
action304	0.0979	0.3493	0.2514
action143	0.0914	0.3266	0.2352
action62	0.0913	0.3442	0.2529
action41	0.0905	0.4239	0.3335
action107	0.0901	0.3156	0.2255
action269	0.0872	0.318	0.2308
action252	0.085	0.359	0.2741
action209	0.0802	0.3378	0.2576
action296	0.08	0.3659	0.286
action301	0.0794	0.3122	0.2328
action297	0.0792	0.3254	0.2461
action39	0.0789	0.3557	0.2769
action380	0.078	0.3862	0.3082
action54	0.0775	0.3627	0.2852
action293	0.0752	0.331	0.2558
action237	0.0734	0.3376	0.2642
action272	0.0707	0.3259	0.2552
action236	0.0705	0.3309	0.2604
action88	0.0696	0.3555	0.2859
action344	0.0695	0.3406	0.2711
action75	0.0686	0.3269	0.2582
action26	0.0659	0.3256	0.2597
action81	0.0656	0.4039	0.3383
action98	0.0627	0.3406	0.2779
action165	0.0612	0.3652	0.304
action111	0.0586	0.3035	0.2449
action305	0.0586	0.3	0.2413
action200	0.0568	0.3291	0.2722
action333	0.0549	0.328	0.2731
action336	0.0529	0.3581	0.3052
action341	0.0517	0.3047	0.253
action135	0.0515	0.3234	0.2719
action337	0.0487	0.3159	0.2672
action384	0.0481	0.3386	0.2905
action308	0.0469	0.3059	0.2589
action30	0.0459	0.3215	0.2756
action91	0.0458	0.3131	0.2673
action273	0.0441	0.3102	0.266
action102	0.0432	0.3068	0.2636
action249	0.0425	0.3202	0.2777
action147	0.0403	0.2898	0.2495
action309	0.0381	0.2937	0.2556
action79	0.0357	0.3231	0.2874
action50	0.035	0.3294	0.2944
action7	0.0349	0.347	0.312
action292	0.0333	0.3284	0.2951
action128	0.0309	0.3355	0.3045
action276	0.0304	0.3109	0.2805
action312	0.0277	0.3036	0.2759
action66	0.0274	0.2928	0.2654
action345	0.0274	0.2919	0.2645
action376	0.0273	0.3521	0.3248
action121	0.0272	0.3838	0.3566
action381	0.0246	0.3018	0.2772
action179	0.0221	0.3011	0.279
action348	0.0206	0.2994	0.2788
action94	0.0199	0.3156	0.2957
action183	0.0169	0.282	0.2651
action240	0.0167	0.309	0.2923
action115	0.0165	0.2937	0.2773
action277	0.016	0.3143	0.2983
action205	0.0153	0.3451	0.3298
action70	0.0144	0.293	0.2786
action151	0.0119	0.2798	0.2679
action377	0.0114	0.3076	0.2962
action349	0.0091	0.2864	0.2773
action175	0.0091	0.3008	0.2917
action4	0.0084	0.3939	0.3854
action373	0.0072	0.3135	0.3063
action138	0.0071	0.3065	0.2995
action34	0.0068	0.3089	0.3021
action385	0.005	0.2913	0.2862
action313	0.004	0.2901	0.2861
action332	0.0033	0.3181	0.3148
action289	0.0023	0.3027	0.3004
action47	-0.0048	0.3254	0.3301
action352	-0.005	0.2922	0.2972
action388	-0.0059	0.2944	0.3003
action142	-0.0088	0.2765	0.2853
action316	-0.0096	0.291	0.3005
action44	-0.0098	0.3738	0.3836
action106	-0.0102	0.2654	0.2756
action161	-0.0113	0.3638	0.3751
action119	-0.0132	0.2949	0.3081
action372	-0.0139	0.3196	0.3335
action131	-0.018	0.2813	0.2993
action168	-0.0197	0.3151	0.3348
action38	-0.0214	0.3056	0.327
action389	-0.0216	0.2827	0.3043
action280	-0.0233	0.289	0.3123
action317	-0.0241	0.2943	0.3183
action187	-0.0257	0.2581	0.2838
action87	-0.0263	0.3054	0.3317
action353	-0.0277	0.2824	0.31
action245	-0.0279	0.3252	0.3531
action223	-0.0282	0.2584	0.2866
action392	-0.0282	0.2898	0.318
action329	-0.0316	0.2984	0.3299
action155	-0.0316	0.2709	0.3025
action74	-0.0316	0.2767	0.3084
action84	-0.0347	0.3538	0.3884
action356	-0.0398	0.2817	0.3215
action110	-0.0416	0.2534	0.295
action219	-0.0475	0.2616	0.3091
action134	-0.0488	0.2733	0.322
action201	-0.05	0.3437	0.3937
action393	-0.0501	0.282	0.3321
action357	-0.0502	0.2881	0.3384
action215	-0.0523	0.2666	0.319
action90	-0.0544	0.263	0.3174
action208	-0.0554	0.2951	0.3505
action191	-0.057	0.2473	0.3043
action396	-0.0597	0.2818	0.3415
action146	-0.06	0.2396	0.2996
action369	-0.0637	0.3011	0.3648
action78	-0.0646	0.273	0.3375
action227	-0.0652	0.2384	0.3036
action6	-0.0653	0.2968	0.3622
action285	-0.0655	0.3055	0.371
action159	-0.0659	0.2725	0.3384
action320	-0.067	0.2667	0.3337
action124	-0.073	0.3337	0.4068
action171	-0.0731	0.2585	0.3316
action127	-0.0762	0.285	0.3612
action178	-0.0782	0.251	0.3292
action397	-0.0805	0.2873	0.3678
action182	-0.0834	0.2318	0.3152
action114	-0.0838	0.2436	0.3274
action195	-0.0849	0.2472	0.3321
action263	-0.0854	0.2298	0.3151
action150	-0.0883	0.2297	0.318
action241	-0.0889	0.3237	0.4126
action174	-0.0912	0.2507	0.3418
action3	-0.0918	0.3437	0.4356
action360	-0.0936	0.2601	0.3537
action248	-0.099	0.275	0.374
action325	-0.1	0.2996	0.3995
action259	-0.1007	0.235	0.3357
action255	-0.1024	0.2416	0.344
action231	-0.1048	0.2253	0.3301
action46	-0.105	0.2752	0.3803
action267	-0.1076	0.2177	0.3252
action43	-0.11	0.3237	0.4337
action164	-0.1116	0.3137	0.4252
action118	-0.1134	0.2448	0.3582
action400	-0.1136	0.2602	0.3738
action199	-0.1163	0.2515	0.3678
action130	-0.1183	0.2311	0.3494
action167	-0.1186	0.2649	0.3836
action211	-0.1192	0.2406	0.3598
action365	-0.1245	0.3006	0.4252
action186	-0.126	0.208	0.334
action86	-0.1265	0.2553	0.3818
action235	-0.1274	0.2268	0.3542
action281	-0.1276	0.3036	0.4312
action222	-0.1284	0.2083	0.3367
action154	-0.1319	0.2208	0.3527
action288	-0.1348	0.255	0.3897
action83	-0.1349	0.3036	0.4386
action271	-0.1472	0.2049	0.3521
action218	-0.1477	0.2115	0.3592
action251	-0.149	0.2239	0.3729
action204	-0.1503	0.2936	0.4439
action303	-0.1508	0.2025	0.3533
action214	-0.1526	0.2165	0.3691
action321	-0.1528	0.2969	0.4497
action190	-0.1573	0.1971	0.3544
action295	-0.1588	0.2156	0.3744
action299	-0.1594	0.2091	0.3685
action239	-0.1612	0.2313	0.3925
action328	-0.1624	0.2483	0.4106
action307	-0.1626	0.1943	0.3569
action226	-0.1655	0.1883	0.3537
action207	-0.166	0.2449	0.4109
action158	-0.1661	0.2224	0.3885
action361	-0.1712	0.2969	0.4682
action123	-0.1733	0.2836	0.4569
action170	-0.1734	0.2083	0.3817
action275	-0.1751	0.2057	0.3808
action126	-0.1764	0.2349	0.4113
action368	-0.1831	0.2482	0.4313
action343	-0.1832	0.1954	0.3786
action194	-0.1851	0.1971	0.3822
action262	-0.1856	0.1796	0.3653
action244	-0.1892	0.2736	0.4628
action2	-0.1921	0.2936	0.4857
action347	-0.1935	0.1874	0.3809
action335	-0.1946	0.2076	0.4022
action339	-0.1946	0.2016	0.3962
action291	-0.1967	0.206	0.4026
action311	-0.1998	0.1832	0.383
action258	-0.2009	0.1849	0.3858
action247	-0.2011	0.2251	0.4263
action254	-0.2027	0.1915	0.3941
action383	-0.2037	0.1959	0.3996
action230	-0.2051	0.1752	0.3802
action279	-0.2062	0.211	0.4172
action266	-0.2078	0.1675	0.3753
action42	-0.2103	0.2736	0.4838
action163	-0.2118	0.2635	0.4753
action387	-0.2155	0.1876	0.4031
action379	-0.2157	0.2023	0.418
action198	-0.2165	0.2014	0.4179
action375	-0.2174	0.2083	0.4258
action166	-0.2189	0.2148	0.4337
action210	-0.2194	0.1904	0.4099
action331	-0.2215	0.2018	0.4233
action234	-0.2276	0.1767	0.4043
action284	-0.2278	0.2535	0.4813
action351	-0.231	0.1769	0.4079
action315	-0.2324	0.1847	0.4172
action82	-0.2352	0.2535	0.4887
action371	-0.2369	0.2046	0.4415
action287	-0.2433	0.2056	0.4489
action270	-0.2475	0.1548	0.4023
action250	-0.2492	0.1738	0.423
action203	-0.2505	0.2435	0.494
action302	-0.251	0.1524	0.4034
action324	-0.253	0.2468	0.4998
action319	-0.2583	0.1907	0.4491
action294	-0.259	0.1655	0.4245
action298	-0.2597	0.1589	0.4186
action391	-0.2605	0.1767	0.4372
action355	-0.2614	0.1781	0.4395
action238	-0.2615	0.1812	0.4426
action306	-0.2629	0.1441	0.407
action206	-0.2663	0.1948	0.461
action327	-0.2673	0.1997	0.467
action364	-0.2715	0.2468	0.5183
action122	-0.2735	0.2335	0.507
action274	-0.2753	0.1556	0.4309
action342	-0.2835	0.1452	0.4287
action367	-0.2869	0.2008	0.4878
action395	-0.2886	0.178	0.4667
action243	-0.2894	0.2234	0.5129
action359	-0.2899	0.1842	0.4741
action346	-0.2938	0.1373	0.4311
action334	-0.2948	0.1575	0.4523
action338	-0.2949	0.1515	0.4463
action290	-0.2969	0.1559	0.4528
action310	-0.3	0.1331	0.4331
action246	-0.3014	0.175	0.4764
action382	-0.304	0.1458	0.4497
action278	-0.3064	0.1609	0.4673
action162	-0.3121	0.2134	0.5255
action399	-0.3124	0.1842	0.4965
action386	-0.3158	0.1374	0.4532
action378	-0.316	0.1522	0.4681
action374	-0.3177	0.1582	0.4759
action330	-0.3217	0.1517	0.4734
action283	-0.3281	0.2034	0.5315
action350	-0.3312	0.1268	0.458
action314	-0.3327	0.1346	0.4673
action370	-0.3371	0.1545	0.4916
action286	-0.3436	0.1555	0.499
action202	-0.3508	0.1934	0.5441
action323	-0.3533	0.1967	0.55
action318	-0.3586	0.1406	0.4992
action390	-0.3607	0.1266	0.4873
action354	-0.3616	0.128	0.4897
action326	-0.3676	0.1496	0.5171
action363	-0.3717	0.1967	0.5684
action366	-0.3872	0.1507	0.5379
action394	-0.3889	0.1279	0.5168
action242	-0.3897	0.1733	0.563
action358	-0.3902	0.134	0.5242
action398	-0.4126	0.134	0.5466
action282	-0.4283	0.1533	0.5816
action322	-0.4535	0.1466	0.6001
action362	-0.472	0.1466	0.6185

## Sheet: real-linear-uncertainty-ranking
A	Phi	Phi+	Phi-	Rank	SF	PP	Measure	Last Iter.	Coverage	Coverage
A17	0.478	0.5942	0.1162	1	0.01	0.4	0.02	16.2	43.74	0.4374
A21	0.452	0.5481	0.0961	2	0.01	0.5	0.02	13.8	53.73	0.5373
A57	0.4463	0.5625	0.1162	3	0.02	0.4	0.02	15.4	43.84	0.4384
A13	0.446	0.5774	0.1314	4	0.01	0.3	0.02	15.3	30.92	0.3092
A9	0.4227	0.5607	0.138	5	0.01	0.2	0.02	15	15.75	0.1575
A61	0.4164	0.5142	0.0978	6	0.02	0.5	0.02	13.2	53.82	0.5382
A25	0.4057	0.5055	0.0999	7	0.01	0.6	0.02	12.3	61.16	0.6116
A97	0.403	0.5267	0.1237	8	0.03	0.4	0.02	14.5	43.94	0.4394
A53	0.4029	0.5355	0.1325	9	0.02	0.3	0.02	14.1	31.21	0.3121
A20	0.3922	0.5585	0.1663	10	0.01	0.4	0.03	17.6	43.73	0.4373

## Sheet: synthetic-gaussian
Scenario	Scenario1
Evaluations	Seeding Fraction	Average PP	Measure	Average Last Iteration	Average Coverage
action1	0.01	0.01	0.006	1	1.05
action2	0.01	0.01	0.011	1	1.05
action3	0.01	0.01	0.0085	1	1.05
action4	0.01	0.01	0.009	1	1.05
action5	0.01	0.1	0.006	9.7	16.89
action6	0.01	0.1	0.011	9.7	16.9
action7	0.01	0.1	0.0085	9.7	16.9
action8	0.01	0.1	0.009	9.3	16.6
action9	0.01	0.2	0.006	10.4	58.37
action10	0.01	0.2	0.011	10.4	58.37
action11	0.01	0.2	0.0085	10.4	58.37
action12	0.01	0.2	0.009	10.2	58.37
action13	0.01	0.3	0.006	7.9	81.13
action14	0.01	0.3	0.011	7.8	81.13
action15	0.01	0.3	0.0085	7.8	81.13
action16	0.01	0.3	0.009	8.1	81.13
action17	0.01	0.4	0.006	7	91.83
action18	0.01	0.4	0.011	7	91.83
action19	0.01	0.4	0.0085	7	91.83
action20	0.01	0.4	0.009	7	91.83
action21	0.01	0.5	0.006	6.2	96.95
action22	0.01	0.5	0.011	6.1	96.95
action23	0.01	0.5	0.0085	6.1	96.95
action24	0.01	0.5	0.009	6.1	96.95
action25	0.01	0.6	0.006	5.2	98.73
action26	0.01	0.6	0.011	5.2	98.73
action27	0.01	0.6	0.0085	5.2	98.73
action28	0.01	0.6	0.009	5.2	98.73
action29	0.01	0.7	0.006	4.9	99.62
action30	0.01	0.7	0.011	4.9	99.62
action31	0.01	0.7	0.0085	4.9	99.62
action32	0.01	0.7	0.009	4.9	99.62
action33	0.01	0.8	0.006	4.1	99.93
action34	0.01	0.8	0.011	4	99.93
action35	0.01	0.8	0.0085	4	99.93
action36	0.01	0.8	0.009	4	99.93
action37	0.01	0.9	0.006	4	100
action38	0.01	0.9	0.011	4	100
action39	0.01	0.9	0.0085	4	100
action40	0.01	0.9	0.009	4	100
action41	0.02	0.01	0.006	1	1.97
action42	0.02	0.01	0.011	1	1.97
action43	0.02	0.01	0.0085	1	1.97
action44	0.02	0.01	0.009	1	1.97
action45	0.02	0.1	0.006	8.2	20.18
action46	0.02	0.1	0.011	8.2	20.18
action47	0.02	0.1	0.0085	8.2	20.18
action48	0.02	0.1	0.009	8.9	19.55
action49	0.02	0.2	0.006	9.3	58.52
action50	0.02	0.2	0.011	9.3	58.52
action51	0.02	0.2	0.0085	9.3	58.52
action52	0.02	0.2	0.009	9.8	58.37
action53	0.02	0.3	0.006	7.7	81.13
action54	0.02	0.3	0.011	7.7	81.13
action55	0.02	0.3	0.0085	7.7	81.13
action56	0.02	0.3	0.009	7.6	81.13
action57	0.02	0.4	0.006	6.8	91.83
action58	0.02	0.4	0.011	6.8	91.83
action59	0.02	0.4	0.0085	6.8	91.83
action60	0.02	0.4	0.009	6.8	91.83
action61	0.02	0.5	0.006	5.7	96.95
action62	0.02	0.5	0.011	5.7	96.95
action63	0.02	0.5	0.0085	5.7	96.95
action64	0.02	0.5	0.009	5.8	96.95
action65	0.02	0.6	0.006	5.1	98.73
action66	0.02	0.6	0.011	5.1	98.73
action67	0.02	0.6	0.0085	5.1	98.73
action68	0.02	0.6	0.009	4.9	98.73
action69	0.02	0.7	0.006	4.3	99.62
action70	0.02	0.7	0.011	4.3	99.62
action71	0.02	0.7	0.0085	4.3	99.62
action72	0.02	0.7	0.009	4.4	99.62
action73	0.02	0.8	0.006	4	99.93
action74	0.02	0.8	0.011	4	99.93
action75	0.02	0.8	0.0085	4	99.93
action76	0.02	0.8	0.009	4	99.93
action77	0.02	0.9	0.006	4	100
action78	0.02	0.9	0.011	4	100
action79	0.02	0.9	0.0085	4	100
action80	0.02	0.9	0.009	4	100
action81	0.03	0.01	0.006	1	3.02
action82	0.03	0.01	0.011	1	3.02
action83	0.03	0.01	0.0085	1	3.02
action84	0.03	0.01	0.009	1	3.02
action85	0.03	0.1	0.006	7.7	22.26
action86	0.03	0.1	0.011	7.6	22.47
action87	0.03	0.1	0.0085	7.6	22.47
action88	0.03	0.1	0.009	6.9	22.1
action89	0.03	0.2	0.006	9	58.83
action90	0.03	0.2	0.011	8.9	58.83
action91	0.03	0.2	0.0085	8.9	58.83
action92	0.03	0.2	0.009	9	58.58
action93	0.03	0.3	0.006	7.1	81.13
action94	0.03	0.3	0.011	7.3	81.13
action95	0.03	0.3	0.0085	7.3	81.13
action96	0.03	0.3	0.009	7.5	81.13
action97	0.03	0.4	0.006	6.5	91.83
action98	0.03	0.4	0.011	6.6	91.83
action99	0.03	0.4	0.0085	6.6	91.83
action100	0.03	0.4	0.009	6.7	91.83
action101	0.03	0.5	0.006	5.5	96.95
action102	0.03	0.5	0.011	5.5	96.95
action103	0.03	0.5	0.0085	5.5	96.95
action104	0.03	0.5	0.009	5.6	96.95
action105	0.03	0.6	0.006	4.9	98.73
action106	0.03	0.6	0.011	4.8	98.73
action107	0.03	0.6	0.0085	4.8	98.73
action108	0.03	0.6	0.009	4.7	98.73
action109	0.03	0.7	0.006	4.3	99.62
action110	0.03	0.7	0.011	4.3	99.62
action111	0.03	0.7	0.0085	4.3	99.62
action112	0.03	0.7	0.009	4.3	99.62
action113	0.03	0.8	0.006	4	99.93
action114	0.03	0.8	0.011	4	99.93
action115	0.03	0.8	0.0085	4	99.93
action116	0.03	0.8	0.009	4	99.93
action117	0.03	0.9	0.006	3.8	100
action118	0.03	0.9	0.011	3.8	100
action119	0.03	0.9	0.0085	3.8	100
action120	0.03	0.9	0.009	3.8	100
action121	0.04	0.01	0.006	1	3.94
action122	0.04	0.01	0.011	1	3.94
action123	0.04	0.01	0.0085	1	3.94
action124	0.04	0.01	0.009	1	3.94
action125	0.04	0.1	0.006	6.9	24.82
action126	0.04	0.1	0.011	6.9	24.11
action127	0.04	0.1	0.0085	6.9	24.11
action128	0.04	0.1	0.009	6.7	23.88
action129	0.04	0.2	0.006	8.6	58.83
action130	0.04	0.2	0.011	8.8	58.84
action131	0.04	0.2	0.0085	8.8	58.84
action132	0.04	0.2	0.009	8.9	58.83
action133	0.04	0.3	0.006	7.1	81.13
action134	0.04	0.3	0.011	7.1	81.13
action135	0.04	0.3	0.0085	7.1	81.13
action136	0.04	0.3	0.009	7.1	81.13
action137	0.04	0.4	0.006	6.5	91.83
action138	0.04	0.4	0.011	6.5	91.83
action139	0.04	0.4	0.0085	6.5	91.83
action140	0.04	0.4	0.009	6.5	91.83
action141	0.04	0.5	0.006	5.5	96.95
action142	0.04	0.5	0.011	5.5	96.95
action143	0.04	0.5	0.0085	5.5	96.95
action144	0.04	0.5	0.009	5.5	96.95
action145	0.04	0.6	0.006	4.7	98.73
action146	0.04	0.6	0.011	4.7	98.73
action147	0.04	0.6	0.0085	4.7	98.73
action148	0.04	0.6	0.009	4.7	98.73
action149	0.04	0.7	0.006	4.3	99.62
action150	0.04	0.7	0.011	4.3	99.62
action151	0.04	0.7	0.0085	4.3	99.62
action152	0.04	0.7	0.009	4.3	99.62
action153	0.04	0.8	0.006	4	99.93
action154	0.04	0.8	0.011	4	99.93
action155	0.04	0.8	0.0085	4	99.93
action156	0.04	0.8	0.009	4	99.93
action157	0.04	0.9	0.006	3.5	100
action158	0.04	0.9	0.011	3.6	100
action159	0.04	0.9	0.0085	3.6	100
action160	0.04	0.9	0.009	3.7	100
action161	0.05	0.01	0.006	1	4.99
action162	0.05	0.01	0.011	1	4.99
action163	0.05	0.01	0.0085	1	4.99
action164	0.05	0.01	0.009	1	4.99
action165	0.05	0.1	0.006	6.4	25.97
action166	0.05	0.1	0.011	6.8	26.04
action167	0.05	0.1	0.0085	6.8	26.04
action168	0.05	0.1	0.009	6.7	25.57
action169	0.05	0.2	0.006	8.1	59.22
action170	0.05	0.2	0.011	8.1	59.12
action171	0.05	0.2	0.0085	8.1	59.12
action172	0.05	0.2	0.009	8.4	58.99
action173	0.05	0.3	0.006	7	81.13
action174	0.05	0.3	0.011	7	81.13
action175	0.05	0.3	0.0085	7	81.13
action176	0.05	0.3	0.009	7	81.13
action177	0.05	0.4	0.006	6.4	91.83
action178	0.05	0.4	0.011	6.4	91.83
action179	0.05	0.4	0.0085	6.4	91.83
action180	0.05	0.4	0.009	6.4	91.83
action181	0.05	0.5	0.006	5.5	96.95
action182	0.05	0.5	0.011	5.5	96.95
action183	0.05	0.5	0.0085	5.5	96.95
action184	0.05	0.5	0.009	5.5	96.95
action185	0.05	0.6	0.006	4.7	98.73
action186	0.05	0.6	0.011	4.7	98.73
action187	0.05	0.6	0.0085	4.7	98.73
action188	0.05	0.6	0.009	4.7	98.73
action189	0.05	0.7	0.006	4.3	99.62
action190	0.05	0.7	0.011	4.3	99.62
action191	0.05	0.7	0.0085	4.3	99.62
action192	0.05	0.7	0.009	4.3	99.62
action193	0.05	0.8	0.006	4	99.93
action194	0.05	0.8	0.011	4	99.93
action195	0.05	0.8	0.0085	4	99.93
action196	0.05	0.8	0.009	4	99.93
action197	0.05	0.9	0.006	3.4	100
action198	0.05	0.9	0.011	3.4	100
action199	0.05	0.9	0.0085	3.4	100
action200	0.05	0.9	0.009	3.5	100
action201	0.06	0.01	0.006	1	6.04
action202	0.06	0.01	0.011	1	6.04
action203	0.06	0.01	0.0085	1	6.04
action204	0.06	0.01	0.009	1	6.04
action205	0.06	0.1	0.006	6.2	27.32
action206	0.06	0.1	0.011	6.2	27.32
action207	0.06	0.1	0.0085	6.2	27.32
action208	0.06	0.1	0.009	6.6	27.03
action209	0.06	0.2	0.006	8.1	59.5
action210	0.06	0.2	0.011	8.1	59.36
action211	0.06	0.2	0.0085	8.1	59.36
action212	0.06	0.2	0.009	8.1	59.47
action213	0.06	0.3	0.006	6.9	81.17
action214	0.06	0.3	0.011	6.9	81.13
action215	0.06	0.3	0.0085	6.9	81.13
action216	0.06	0.3	0.009	7	81.2
action217	0.06	0.4	0.006	6.4	91.83
action218	0.06	0.4	0.011	6.4	91.83
action219	0.06	0.4	0.0085	6.4	91.83
action220	0.06	0.4	0.009	6.4	91.83
action221	0.06	0.5	0.006	5.5	96.95
action222	0.06	0.5	0.011	5.5	96.95
action223	0.06	0.5	0.0085	5.5	96.95
action224	0.06	0.5	0.009	5.5	96.95
action225	0.06	0.6	0.006	4.7	98.73
action226	0.06	0.6	0.011	4.7	98.73
action227	0.06	0.6	0.0085	4.7	98.73
action228	0.06	0.6	0.009	4.7	98.73
action229	0.06	0.7	0.006	4.3	99.62
action230	0.06	0.7	0.011	4.3	99.62
action231	0.06	0.7	0.0085	4.3	99.62
action232	0.06	0.7	0.009	4.3	99.62
action233	0.06	0.8	0.006	4	99.93
action234	0.06	0.8	0.011	4	99.93
action235	0.06	0.8	0.0085	4	99.93
action236	0.06	0.8	0.009	3.9	99.93
action237	0.06	0.9	0.006	3.3	100
action238	0.06	0.9	0.011	3.2	100
action239	0.06	0.9	0.0085	3.2	100
action240	0.06	0.9	0.009	3.5	100
action241	0.07	0.01	0.006	1	6.96
action242	0.07	0.01	0.011	1	6.96
action243	0.07	0.01	0.0085	1	6.96
action244	0.07	0.01	0.009	1	6.96
action245	0.07	0.1	0.006	6.1	28.44
action246	0.07	0.1	0.011	6.1	28.29
action247	0.07	0.1	0.0085	6.1	28.29
action248	0.07	0.1	0.009	6.3	28.27
action249	0.07	0.2	0.006	8.1	59.87
action250	0.07	0.2	0.011	7.5	59.72
action251	0.07	0.2	0.0085	7.5	59.72
action252	0.07	0.2	0.009	7.8	59.88
action253	0.07	0.3	0.006	6.8	81.24
action254	0.07	0.3	0.011	6.8	81.13
action255	0.07	0.3	0.0085	6.8	81.13
action256	0.07	0.3	0.009	7	81.26
action257	0.07	0.4	0.006	6.4	91.83
action258	0.07	0.4	0.011	6.4	91.83
action259	0.07	0.4	0.0085	6.4	91.83
action260	0.07	0.4	0.009	6.4	91.83
action261	0.07	0.5	0.006	5.5	96.95
action262	0.07	0.5	0.011	5.5	96.95
action263	0.07	0.5	0.0085	5.5	96.95
action264	0.07	0.5	0.009	5.5	96.95
action265	0.07	0.6	0.006	4.7	98.73
action266	0.07	0.6	0.011	4.7	98.73
action267	0.07	0.6	0.0085	4.7	98.73
action268	0.07	0.6	0.009	4.6	98.73
action269	0.07	0.7	0.006	4.3	99.62
action270	0.07	0.7	0.011	4.3	99.62
action271	0.07	0.7	0.0085	4.3	99.62
action272	0.07	0.7	0.009	4.3	99.62
action273	0.07	0.8	0.006	3.9	99.93
action274	0.07	0.8	0.011	4	99.93
action275	0.07	0.8	0.0085	4	99.93
action276	0.07	0.8	0.009	3.9	99.93
action277	0.07	0.9	0.006	3.2	100
action278	0.07	0.9	0.011	3.2	100
action279	0.07	0.9	0.0085	3.2	100
action280	0.07	0.9	0.009	3.3	100
action281	0.08	0.01	0.006	1	8.02
action282	0.08	0.01	0.011	1	8.02
action283	0.08	0.01	0.0085	1	8.02
action284	0.08	0.01	0.009	1	8.02
action285	0.08	0.1	0.006	5.9	30.08
action286	0.08	0.1	0.011	6	29.8
action287	0.08	0.1	0.0085	6	29.8
action288	0.08	0.1	0.009	6.1	29.58
action289	0.08	0.2	0.006	7.8	60.33
action290	0.08	0.2	0.011	7.5	60.13
action291	0.08	0.2	0.0085	7.5	60.13
action292	0.08	0.2	0.009	7.8	60.42
action293	0.08	0.3	0.006	6.8	81.3
action294	0.08	0.3	0.011	6.7	81.24
action295	0.08	0.3	0.0085	6.7	81.24
action296	0.08	0.3	0.009	6.7	81.35
action297	0.08	0.4	0.006	6.3	91.84
action298	0.08	0.4	0.011	6.3	91.83
action299	0.08	0.4	0.0085	6.3	91.83
action300	0.08	0.4	0.009	6.3	91.84
action301	0.08	0.5	0.006	5.4	96.95
action302	0.08	0.5	0.011	5.4	96.95
action303	0.08	0.5	0.0085	5.4	96.95
action304	0.08	0.5	0.009	5.5	96.96
action305	0.08	0.6	0.006	4.6	98.73
action306	0.08	0.6	0.011	4.7	98.73
action307	0.08	0.6	0.0085	4.7	98.73
action308	0.08	0.6	0.009	4.6	98.73
action309	0.08	0.7	0.006	4.2	99.62
action310	0.08	0.7	0.011	4.3	99.62
action311	0.08	0.7	0.0085	4.3	99.62
action312	0.08	0.7	0.009	4.3	99.62
action313	0.08	0.8	0.006	3.8	99.93
action314	0.08	0.8	0.011	3.9	99.93
action315	0.08	0.8	0.0085	3.9	99.93
action316	0.08	0.8	0.009	3.9	99.93
action317	0.08	0.9	0.006	3.2	100
action318	0.08	0.9	0.011	3.2	100
action319	0.08	0.9	0.0085	3.2	100
action320	0.08	0.9	0.009	3.3	100
action321	0.09	0.01	0.006	1	8.94
action322	0.09	0.01	0.011	1	8.94
action323	0.09	0.01	0.0085	1	8.94
action324	0.09	0.01	0.009	1	8.94
action325	0.09	0.1	0.006	5.7	31.16
action326	0.09	0.1	0.011	6	31.12
action327	0.09	0.1	0.0085	6	31.12
action328	0.09	0.1	0.009	6.2	30.72
action329	0.09	0.2	0.006	7.4	60.47
action330	0.09	0.2	0.011	6.8	60.51
action331	0.09	0.2	0.0085	6.8	60.51
action332	0.09	0.2	0.009	7.2	60.95
action333	0.09	0.3	0.006	6.6	81.3
action334	0.09	0.3	0.011	6.6	81.31
action335	0.09	0.3	0.0085	6.6	81.31
action336	0.09	0.3	0.009	6.6	81.48
action337	0.09	0.4	0.006	6.3	91.84
action338	0.09	0.4	0.011	6.3	91.84
action339	0.09	0.4	0.0085	6.3	91.84
action340	0.09	0.4	0.009	6.2	91.88
action341	0.09	0.5	0.006	5.4	96.95
action342	0.09	0.5	0.011	5.4	96.95
action343	0.09	0.5	0.0085	5.4	96.95
action344	0.09	0.5	0.009	5.5	96.98
action345	0.09	0.6	0.006	4.6	98.73
action346	0.09	0.6	0.011	4.7	98.73
action347	0.09	0.6	0.0085	4.7	98.73
action348	0.09	0.6	0.009	4.6	98.73
action349	0.09	0.7	0.006	4.2	99.62
action350	0.09	0.7	0.011	4.2	99.62
action351	0.09	0.7	0.0085	4.2	99.62
action352	0.09	0.7	0.009	4.3	99.62
action353	0.09	0.8	0.006	3.8	99.93
action354	0.09	0.8	0.011	3.8	99.93
action355	0.09	0.8	0.0085	3.8	99.93
action356	0.09	0.8	0.009	3.9	99.93
action357	0.09	0.9	0.006	3.2	100
action358	0.09	0.9	0.011	3.2	100
action359	0.09	0.9	0.0085	3.2	100
action360	0.09	0.9	0.009	3.2	100
action361	0.1	0.01	0.006	1	9.99
action362	0.1	0.01	0.011	1	9.99
action363	0.1	0.01	0.0085	1	9.99
action364	0.1	0.01	0.009	1	9.99
action365	0.1	0.1	0.006	5.7	32.27
action366	0.1	0.1	0.011	5.8	32.59
action367	0.1	0.1	0.0085	5.8	32.59
action368	0.1	0.1	0.009	5.9	31.81
action369	0.1	0.2	0.006	6.9	60.95
action370	0.1	0.2	0.011	6.8	61.21
action371	0.1	0.2	0.0085	6.8	61.21
action372	0.1	0.2	0.009	7.2	61.38
action373	0.1	0.3	0.006	6.5	81.34
action374	0.1	0.3	0.011	6.5	81.51
action375	0.1	0.3	0.0085	6.5	81.51
action376	0.1	0.3	0.009	6.5	81.52
action377	0.1	0.4	0.006	6.2	91.84
action378	0.1	0.4	0.011	6.1	91.91
action379	0.1	0.4	0.0085	6.1	91.91
action380	0.1	0.4	0.009	6.2	91.88
action381	0.1	0.5	0.006	5.3	96.95
action382	0.1	0.5	0.011	5.3	96.95
action383	0.1	0.5	0.0085	5.3	96.95
action384	0.1	0.5	0.009	5.5	96.98
action385	0.1	0.6	0.006	4.6	98.73
action386	0.1	0.6	0.011	4.6	98.73
action387	0.1	0.6	0.0085	4.6	98.73
action388	0.1	0.6	0.009	4.6	98.73
action389	0.1	0.7	0.006	4.2	99.62
action390	0.1	0.7	0.011	4.2	99.62
action391	0.1	0.7	0.0085	4.2	99.62
action392	0.1	0.7	0.009	4.2	99.62
action393	0.1	0.8	0.006	3.6	99.93
action394	0.1	0.8	0.011	3.7	99.93
action395	0.1	0.8	0.0085	3.7	99.93
action396	0.1	0.8	0.009	3.9	99.93
action397	0.1	0.9	0.006	3.2	100
action398	0.1	0.9	0.011	3.2	100
action399	0.1	0.9	0.0085	3.2	100
action400	0.1	0.9	0.009	3.2	100
Preferences	Seeding Fraction	Average PP	Measure	Average Last Iteration	Average Coverage
active	yes	yes	yes	yes	yes
Min/Max	min	min	min	max	max
Weight	1	1	1	1	1
Preference function	Gaussian	Gaussian	Gaussian	Gaussian	Gaussian
Thresholds	absolute	absolute	absolute	absolute	absolute
q	0.015	0.145	0.0009	1.045	16.38
p	0.03	0.29	0.0019	2.09	32.76
s	0.055	0.451	0.0086	5.188	75.91
Unicriterion flows	Seeding Fraction	Average PP	Measure	Average Last Iteration	Average Coverage
action1	0.3192	0.3965	0.0641	-0.3023	-0.4088
action2	0.3192	0.3965	-0.056	-0.3023	-0.4088
action3	0.3192	0.3965	0.0004	-0.3023	-0.4088
action4	0.3192	0.3965	-0.0085	-0.3023	-0.4088
action5	0.3192	0.3169	0.0641	0.3286	-0.3054
action6	0.3192	0.3169	-0.056	0.3286	-0.3053
action7	0.3192	0.3169	0.0004	0.3286	-0.3053
action8	0.3192	0.3169	-0.0085	0.2902	-0.3073
action9	0.3192	0.2285	0.0641	0.3982	-0.0502
action10	0.3192	0.2285	-0.056	0.3982	-0.0502
action11	0.3192	0.2285	0.0004	0.3982	-0.0502
action12	0.3192	0.2285	-0.0085	0.3781	-0.0502
action13	0.3192	0.1387	0.0641	0.1691	0.0519
action14	0.3192	0.1387	-0.056	0.1614	0.0519
action15	0.3192	0.1387	0.0004	0.1614	0.0519
action16	0.3192	0.1387	-0.0085	0.1848	0.0519
action17	0.3192	0.0474	0.0641	0.1055	0.0867
action18	0.3192	0.0474	-0.056	0.1055	0.0867
action19	0.3192	0.0474	0.0004	0.1055	0.0867
action20	0.3192	0.0474	-0.0085	0.1055	0.0867
action21	0.3192	-0.0447	0.0641	0.0579	0.101
action22	0.3192	-0.0447	-0.056	0.0523	0.101
action23	0.3192	-0.0447	0.0004	0.0523	0.101
action24	0.3192	-0.0447	-0.0085	0.0523	0.101
action25	0.3192	-0.1363	0.0641	0.0035	0.1057
action26	0.3192	-0.1363	-0.056	0.0035	0.1057
action27	0.3192	-0.1363	0.0004	0.0035	0.1057
action28	0.3192	-0.1363	-0.0085	0.0035	0.1057
action29	0.3192	-0.2265	0.0641	-0.0126	0.1081
action30	0.3192	-0.2265	-0.056	-0.0126	0.1081
action31	0.3192	-0.2265	0.0004	-0.0126	0.1081
action32	0.3192	-0.2265	-0.0085	-0.0126	0.1081
action33	0.3192	-0.3156	0.0641	-0.0566	0.1089
action34	0.3192	-0.3156	-0.056	-0.0624	0.1089
action35	0.3192	-0.3156	0.0004	-0.0624	0.1089
action36	0.3192	-0.3156	-0.0085	-0.0624	0.1089
action37	0.3192	-0.4048	0.0641	-0.0624	0.1091
action38	0.3192	-0.4048	-0.056	-0.0624	0.1091
action39	0.3192	-0.4048	0.0004	-0.0624	0.1091
action40	0.3192	-0.4048	-0.0085	-0.0624	0.1091
action41	0.2436	0.3965	0.0641	-0.3023	-0.4028
action42	0.2436	0.3965	-0.056	-0.3023	-0.4028
action43	0.2436	0.3965	0.0004	-0.3023	-0.4028
action44	0.2436	0.3965	-0.0085	-0.3023	-0.4028
action45	0.2436	0.3169	0.0641	0.1929	-0.2839
action46	0.2436	0.3169	-0.056	0.1929	-0.2839
action47	0.2436	0.3169	0.0004	0.1929	-0.2839
action48	0.2436	0.3169	-0.0085	0.2533	-0.288
action49	0.2436	0.2285	0.0641	0.2902	-0.0494
action50	0.2436	0.2285	-0.056	0.2902	-0.0494
action51	0.2436	0.2285	0.0004	0.2902	-0.0494
action52	0.2436	0.2285	-0.0085	0.3384	-0.0502
action53	0.2436	0.1387	0.0641	0.1539	0.0519
action54	0.2436	0.1387	-0.056	0.1539	0.0519
action55	0.2436	0.1387	0.0004	0.1539	0.0519
action56	0.2436	0.1387	-0.0085	0.1466	0.0519
action57	0.2436	0.0474	0.0641	0.0929	0.0867
action58	0.2436	0.0474	-0.056	0.0929	0.0867
action59	0.2436	0.0474	0.0004	0.0929	0.0867
action60	0.2436	0.0474	-0.0085	0.0929	0.0867
action61	0.2436	-0.0447	0.0641	0.0304	0.101
action62	0.2436	-0.0447	-0.056	0.0304	0.101
action63	0.2436	-0.0447	0.0004	0.0304	0.101
action64	0.2436	-0.0447	-0.0085	0.0358	0.101
action65	0.2436	-0.1363	0.0641	-0.0019	0.1057
action66	0.2436	-0.1363	-0.056	-0.0019	0.1057
action67	0.2436	-0.1363	0.0004	-0.0019	0.1057
action68	0.2436	-0.1363	-0.0085	-0.0126	0.1057
action69	0.2436	-0.2265	0.0641	-0.0453	0.1081
action70	0.2436	-0.2265	-0.056	-0.0453	0.1081
action71	0.2436	-0.2265	0.0004	-0.0453	0.1081
action72	0.2436	-0.2265	-0.0085	-0.0398	0.1081
action73	0.2436	-0.3156	0.0641	-0.0624	0.1089
action74	0.2436	-0.3156	-0.056	-0.0624	0.1089
action75	0.2436	-0.3156	0.0004	-0.0624	0.1089
action76	0.2436	-0.3156	-0.0085	-0.0624	0.1089
action77	0.2436	-0.4048	0.0641	-0.0624	0.1091
action78	0.2436	-0.4048	-0.056	-0.0624	0.1091
action79	0.2436	-0.4048	0.0004	-0.0624	0.1091
action80	0.2436	-0.4048	-0.0085	-0.0624	0.1091
action81	0.1717	0.3965	0.0641	-0.3023	-0.3959
action82	0.1717	0.3965	-0.056	-0.3023	-0.3959
action83	0.1717	0.3965	0.0004	-0.3023	-0.3959
action84	0.1717	0.3965	-0.0085	-0.3023	-0.3959
action85	0.1717	0.3169	0.0641	0.1539	-0.2703
action86	0.1717	0.3169	-0.056	0.1466	-0.269
action87	0.1717	0.3169	0.0004	0.1466	-0.269
action88	0.1717	0.3169	-0.0085	0.0991	-0.2714
action89	0.1717	0.2285	0.0641	0.2624	-0.0478
action90	0.1717	0.2285	-0.056	0.2533	-0.0478
action91	0.1717	0.2285	0.0004	0.2533	-0.0478
action92	0.1717	0.2285	-0.0085	0.2624	-0.0491
action93	0.1717	0.1387	0.0641	0.1119	0.0519
action94	0.1717	0.1387	-0.056	0.1253	0.0519
action95	0.1717	0.1387	0.0004	0.1253	0.0519
action96	0.1717	0.1387	-0.0085	0.1393	0.0519
action97	0.1717	0.0474	0.0641	0.075	0.0867
action98	0.1717	0.0474	-0.056	0.0809	0.0867
action99	0.1717	0.0474	0.0004	0.0809	0.0867
action100	0.1717	0.0474	-0.0085	0.0869	0.0867
action101	0.1717	-0.0447	0.0641	0.0196	0.101
action102	0.1717	-0.0447	-0.056	0.0196	0.101
action103	0.1717	-0.0447	0.0004	0.0196	0.101
action104	0.1717	-0.0447	-0.0085	0.0249	0.101
action105	0.1717	-0.1363	0.0641	-0.0126	0.1057
action106	0.1717	-0.1363	-0.056	-0.018	0.1057
action107	0.1717	-0.1363	0.0004	-0.018	0.1057
action108	0.1717	-0.1363	-0.0085	-0.0234	0.1057
action109	0.1717	-0.2265	0.0641	-0.0453	0.1081
action110	0.1717	-0.2265	-0.056	-0.0453	0.1081
action111	0.1717	-0.2265	0.0004	-0.0453	0.1081
action112	0.1717	-0.2265	-0.0085	-0.0453	0.1081
action113	0.1717	-0.3156	0.0641	-0.0624	0.1089
action114	0.1717	-0.3156	-0.056	-0.0624	0.1089
action115	0.1717	-0.3156	0.0004	-0.0624	0.1089
action116	0.1717	-0.3156	-0.0085	-0.0624	0.1089
action117	0.1717	-0.4048	0.0641	-0.0744	0.1091
action118	0.1717	-0.4048	-0.056	-0.0744	0.1091
action119	0.1717	-0.4048	0.0004	-0.0744	0.1091
action120	0.1717	-0.4048	-0.0085	-0.0744	0.1091
action121	0.1022	0.3965	0.0641	-0.3023	-0.3899
action122	0.1022	0.3965	-0.056	-0.3023	-0.3899
action123	0.1022	0.3965	0.0004	-0.3023	-0.3899
action124	0.1022	0.3965	-0.0085	-0.3023	-0.3899
action125	0.1022	0.3169	0.0641	0.0991	-0.2537
action126	0.1022	0.3169	-0.056	0.0991	-0.2583
action127	0.1022	0.3169	0.0004	0.0991	-0.2583
action128	0.1022	0.3169	-0.0085	0.0869	-0.2598
action129	0.1022	0.2285	0.0641	0.2267	-0.0478
action130	0.1022	0.2285	-0.056	0.2443	-0.0478
action131	0.1022	0.2285	0.0004	0.2443	-0.0478
action132	0.1022	0.2285	-0.0085	0.2533	-0.0478
action133	0.1022	0.1387	0.0641	0.1119	0.0519
action134	0.1022	0.1387	-0.056	0.1119	0.0519
action135	0.1022	0.1387	0.0004	0.1119	0.0519
action136	0.1022	0.1387	-0.0085	0.1119	0.0519
action137	0.1022	0.0474	0.0641	0.075	0.0867
action138	0.1022	0.0474	-0.056	0.075	0.0867
action139	0.1022	0.0474	0.0004	0.075	0.0867
action140	0.1022	0.0474	-0.0085	0.075	0.0867
action141	0.1022	-0.0447	0.0641	0.0196	0.101
action142	0.1022	-0.0447	-0.056	0.0196	0.101
action143	0.1022	-0.0447	0.0004	0.0196	0.101
action144	0.1022	-0.0447	-0.0085	0.0196	0.101
action145	0.1022	-0.1363	0.0641	-0.0234	0.1057
action146	0.1022	-0.1363	-0.056	-0.0234	0.1057
action147	0.1022	-0.1363	0.0004	-0.0234	0.1057
action148	0.1022	-0.1363	-0.0085	-0.0234	0.1057
action149	0.1022	-0.2265	0.0641	-0.0453	0.1081
action150	0.1022	-0.2265	-0.056	-0.0453	0.1081
action151	0.1022	-0.2265	0.0004	-0.0453	0.1081
action152	0.1022	-0.2265	-0.0085	-0.0453	0.1081
action153	0.1022	-0.3156	0.0641	-0.0624	0.1089
action154	0.1022	-0.3156	-0.056	-0.0624	0.1089
action155	0.1022	-0.3156	0.0004	-0.0624	0.1089
action156	0.1022	-0.3156	-0.0085	-0.0624	0.1089
action157	0.1022	-0.4048	0.0641	-0.0936	0.1091
action158	0.1022	-0.4048	-0.056	-0.087	0.1091
action159	0.1022	-0.4048	0.0004	-0.087	0.1091
action160	0.1022	-0.4048	-0.0085	-0.0806	0.1091
action161	0.0339	0.3965	0.0641	-0.3023	-0.3831
action162	0.0339	0.3965	-0.056	-0.3023	-0.3831
action163	0.0339	0.3965	0.0004	-0.3023	-0.3831
action164	0.0339	0.3965	-0.0085	-0.3023	-0.3831
action165	0.0339	0.3169	0.0641	0.0693	-0.2463
action166	0.0339	0.3169	-0.056	0.0929	-0.2458
action167	0.0339	0.3169	0.0004	0.0929	-0.2458
action168	0.0339	0.3169	-0.0085	0.0869	-0.2489
action169	0.0339	0.2285	0.0641	0.1848	-0.0458
action170	0.0339	0.2285	-0.056	0.1848	-0.0463
action171	0.0339	0.2285	0.0004	0.1848	-0.0463
action172	0.0339	0.2285	-0.0085	0.2095	-0.047
action173	0.0339	0.1387	0.0641	0.1055	0.0519
action174	0.0339	0.1387	-0.056	0.1055	0.0519
action175	0.0339	0.1387	0.0004	0.1055	0.0519
action176	0.0339	0.1387	-0.0085	0.1055	0.0519
action177	0.0339	0.0474	0.0641	0.0693	0.0867
action178	0.0339	0.0474	-0.056	0.0693	0.0867
action179	0.0339	0.0474	0.0004	0.0693	0.0867
action180	0.0339	0.0474	-0.0085	0.0693	0.0867
action181	0.0339	-0.0447	0.0641	0.0196	0.101
action182	0.0339	-0.0447	-0.056	0.0196	0.101
action183	0.0339	-0.0447	0.0004	0.0196	0.101
action184	0.0339	-0.0447	-0.0085	0.0196	0.101
action185	0.0339	-0.1363	0.0641	-0.0234	0.1057
action186	0.0339	-0.1363	-0.056	-0.0234	0.1057
action187	0.0339	-0.1363	0.0004	-0.0234	0.1057
action188	0.0339	-0.1363	-0.0085	-0.0234	0.1057
action189	0.0339	-0.2265	0.0641	-0.0453	0.1081
action190	0.0339	-0.2265	-0.056	-0.0453	0.1081
action191	0.0339	-0.2265	0.0004	-0.0453	0.1081
action192	0.0339	-0.2265	-0.0085	-0.0453	0.1081
action193	0.0339	-0.3156	0.0641	-0.0624	0.1089
action194	0.0339	-0.3156	-0.056	-0.0624	0.1089
action195	0.0339	-0.3156	0.0004	-0.0624	0.1089
action196	0.0339	-0.3156	-0.0085	-0.0624	0.1089
action197	0.0339	-0.4048	0.0641	-0.1003	0.1091
action198	0.0339	-0.4048	-0.056	-0.1003	0.1091
action199	0.0339	-0.4048	0.0004	-0.1003	0.1091
action200	0.0339	-0.4048	-0.0085	-0.0936	0.1091
action201	-0.0339	0.3965	0.0641	-0.3023	-0.3763
action202	-0.0339	0.3965	-0.056	-0.3023	-0.3763
action203	-0.0339	0.3965	0.0004	-0.3023	-0.3763
action204	-0.0339	0.3965	-0.0085	-0.3023	-0.3763
action205	-0.0339	0.3169	0.0641	0.0579	-0.2376
action206	-0.0339	0.3169	-0.056	0.0579	-0.2376
action207	-0.0339	0.3169	0.0004	0.0579	-0.2376
action208	-0.0339	0.3169	-0.0085	0.0809	-0.2394
action209	-0.0339	0.2285	0.0641	0.1848	-0.0444
action210	-0.0339	0.2285	-0.056	0.1848	-0.0451
action211	-0.0339	0.2285	0.0004	0.1848	-0.0451
action212	-0.0339	0.2285	-0.0085	0.1848	-0.0445
action213	-0.0339	0.1387	0.0641	0.0991	0.052
action214	-0.0339	0.1387	-0.056	0.0991	0.0519
action215	-0.0339	0.1387	0.0004	0.0991	0.0519
action216	-0.0339	0.1387	-0.0085	0.1055	0.0521
action217	-0.0339	0.0474	0.0641	0.0693	0.0867
action218	-0.0339	0.0474	-0.056	0.0693	0.0867
action219	-0.0339	0.0474	0.0004	0.0693	0.0867
action220	-0.0339	0.0474	-0.0085	0.0693	0.0867
action221	-0.0339	-0.0447	0.0641	0.0196	0.101
action222	-0.0339	-0.0447	-0.056	0.0196	0.101
action223	-0.0339	-0.0447	0.0004	0.0196	0.101
action224	-0.0339	-0.0447	-0.0085	0.0196	0.101
action225	-0.0339	-0.1363	0.0641	-0.0234	0.1057
action226	-0.0339	-0.1363	-0.056	-0.0234	0.1057
action227	-0.0339	-0.1363	0.0004	-0.0234	0.1057
action228	-0.0339	-0.1363	-0.0085	-0.0234	0.1057
action229	-0.0339	-0.2265	0.0641	-0.0453	0.1081
action230	-0.0339	-0.2265	-0.056	-0.0453	0.1081
action231	-0.0339	-0.2265	0.0004	-0.0453	0.1081
action232	-0.0339	-0.2265	-0.0085	-0.0453	0.1081
action233	-0.0339	-0.3156	0.0641	-0.0624	0.1089
action234	-0.0339	-0.3156	-0.056	-0.0624	0.1089
action235	-0.0339	-0.3156	0.0004	-0.0624	0.1089
action236	-0.0339	-0.3156	-0.0085	-0.0683	0.1089
action237	-0.0339	-0.4048	0.0641	-0.1071	0.1091
action238	-0.0339	-0.4048	-0.056	-0.1141	0.1091
action239	-0.0339	-0.4048	0.0004	-0.1141	0.1091
action240	-0.0339	-0.4048	-0.0085	-0.0936	0.1091
action241	-0.1022	0.3965	0.0641	-0.3023	-0.3703
action242	-0.1022	0.3965	-0.056	-0.3023	-0.3703
action243	-0.1022	0.3965	0.0004	-0.3023	-0.3703
action244	-0.1022	0.3965	-0.0085	-0.3023	-0.3703
action245	-0.1022	0.3169	0.0641	0.0523	-0.2304
action246	-0.1022	0.3169	-0.056	0.0523	-0.2313
action247	-0.1022	0.3169	0.0004	0.0523	-0.2313
action248	-0.1022	0.3169	-0.0085	0.0636	-0.2315
action249	-0.1022	0.2285	0.0641	0.1848	-0.0425
action250	-0.1022	0.2285	-0.056	0.1393	-0.0432
action251	-0.1022	0.2285	0.0004	0.1393	-0.0432
action252	-0.1022	0.2285	-0.0085	0.1614	-0.0424
action253	-0.1022	0.1387	0.0641	0.0929	0.0523
action254	-0.1022	0.1387	-0.056	0.0929	0.0519
action255	-0.1022	0.1387	0.0004	0.0929	0.0519
action256	-0.1022	0.1387	-0.0085	0.1055	0.0523
action257	-0.1022	0.0474	0.0641	0.0693	0.0867
action258	-0.1022	0.0474	-0.056	0.0693	0.0867
action259	-0.1022	0.0474	0.0004	0.0693	0.0867
action260	-0.1022	0.0474	-0.0085	0.0693	0.0867
action261	-0.1022	-0.0447	0.0641	0.0196	0.101
action262	-0.1022	-0.0447	-0.056	0.0196	0.101
action263	-0.1022	-0.0447	0.0004	0.0196	0.101
action264	-0.1022	-0.0447	-0.0085	0.0196	0.101
action265	-0.1022	-0.1363	0.0641	-0.0234	0.1057
action266	-0.1022	-0.1363	-0.056	-0.0234	0.1057
action267	-0.1022	-0.1363	0.0004	-0.0234	0.1057
action268	-0.1022	-0.1363	-0.0085	-0.0288	0.1057
action269	-0.1022	-0.2265	0.0641	-0.0453	0.1081
action270	-0.1022	-0.2265	-0.056	-0.0453	0.1081
action271	-0.1022	-0.2265	0.0004	-0.0453	0.1081
action272	-0.1022	-0.2265	-0.0085	-0.0453	0.1081
action273	-0.1022	-0.3156	0.0641	-0.0683	0.1089
action274	-0.1022	-0.3156	-0.056	-0.0624	0.1089
action275	-0.1022	-0.3156	0.0004	-0.0624	0.1089
action276	-0.1022	-0.3156	-0.0085	-0.0683	0.1089
action277	-0.1022	-0.4048	0.0641	-0.1141	0.1091
action278	-0.1022	-0.4048	-0.056	-0.1141	0.1091
action279	-0.1022	-0.4048	0.0004	-0.1141	0.1091
action280	-0.1022	-0.4048	-0.0085	-0.1071	0.1091
action281	-0.1717	0.3965	0.0641	-0.3023	-0.3634
action282	-0.1717	0.3965	-0.056	-0.3023	-0.3634
action283	-0.1717	0.3965	0.0004	-0.3023	-0.3634
action284	-0.1717	0.3965	-0.0085	-0.3023	-0.3634
action285	-0.1717	0.3169	0.0641	0.0413	-0.2198
action286	-0.1717	0.3169	-0.056	0.0468	-0.2216
action287	-0.1717	0.3169	0.0004	0.0468	-0.2216
action288	-0.1717	0.3169	-0.0085	0.0523	-0.223
action289	-0.1717	0.2285	0.0641	0.1614	-0.0401
action290	-0.1717	0.2285	-0.056	0.1393	-0.0411
action291	-0.1717	0.2285	0.0004	0.1393	-0.0411
action292	-0.1717	0.2285	-0.0085	0.1614	-0.0397
action293	-0.1717	0.1387	0.0641	0.0929	0.0525
action294	-0.1717	0.1387	-0.056	0.0869	0.0523
action295	-0.1717	0.1387	0.0004	0.0869	0.0523
action296	-0.1717	0.1387	-0.0085	0.0869	0.0527
action297	-0.1717	0.0474	0.0641	0.0636	0.0867
action298	-0.1717	0.0474	-0.056	0.0636	0.0867
action299	-0.1717	0.0474	0.0004	0.0636	0.0867
action300	-0.1717	0.0474	-0.0085	0.0636	0.0867
action301	-0.1717	-0.0447	0.0641	0.0142	0.101
action302	-0.1717	-0.0447	-0.056	0.0142	0.101
action303	-0.1717	-0.0447	0.0004	0.0142	0.101
action304	-0.1717	-0.0447	-0.0085	0.0196	0.101
action305	-0.1717	-0.1363	0.0641	-0.0288	0.1057
action306	-0.1717	-0.1363	-0.056	-0.0234	0.1057
action307	-0.1717	-0.1363	0.0004	-0.0234	0.1057
action308	-0.1717	-0.1363	-0.0085	-0.0288	0.1057
action309	-0.1717	-0.2265	0.0641	-0.0509	0.1081
action310	-0.1717	-0.2265	-0.056	-0.0453	0.1081
action311	-0.1717	-0.2265	0.0004	-0.0453	0.1081
action312	-0.1717	-0.2265	-0.0085	-0.0453	0.1081
action313	-0.1717	-0.3156	0.0641	-0.0744	0.1089
action314	-0.1717	-0.3156	-0.056	-0.0683	0.1089
action315	-0.1717	-0.3156	0.0004	-0.0683	0.1089
action316	-0.1717	-0.3156	-0.0085	-0.0683	0.1089
action317	-0.1717	-0.4048	0.0641	-0.1141	0.1091
action318	-0.1717	-0.4048	-0.056	-0.1141	0.1091
action319	-0.1717	-0.4048	0.0004	-0.1141	0.1091
action320	-0.1717	-0.4048	-0.0085	-0.1071	0.1091
action321	-0.2436	0.3965	0.0641	-0.3023	-0.3574
action322	-0.2436	0.3965	-0.056	-0.3023	-0.3574
action323	-0.2436	0.3965	0.0004	-0.3023	-0.3574
action324	-0.2436	0.3965	-0.0085	-0.3023	-0.3574
action325	-0.2436	0.3169	0.0641	0.0304	-0.2129
action326	-0.2436	0.3169	-0.056	0.0468	-0.2132
action327	-0.2436	0.3169	0.0004	0.0468	-0.2132
action328	-0.2436	0.3169	-0.0085	0.0579	-0.2157
action329	-0.2436	0.2285	0.0641	0.1323	-0.0394
action330	-0.2436	0.2285	-0.056	0.0929	-0.0392
action331	-0.2436	0.2285	0.0004	0.0929	-0.0392
action332	-0.2436	0.2285	-0.0085	0.1186	-0.037
action333	-0.2436	0.1387	0.0641	0.0809	0.0525
action334	-0.2436	0.1387	-0.056	0.0809	0.0525
action335	-0.2436	0.1387	0.0004	0.0809	0.0525
action336	-0.2436	0.1387	-0.0085	0.0809	0.0531
action337	-0.2436	0.0474	0.0641	0.0636	0.0867
action338	-0.2436	0.0474	-0.056	0.0636	0.0867
action339	-0.2436	0.0474	0.0004	0.0636	0.0867
action340	-0.2436	0.0474	-0.0085	0.0579	0.0869
action341	-0.2436	-0.0447	0.0641	0.0142	0.101
action342	-0.2436	-0.0447	-0.056	0.0142	0.101
action343	-0.2436	-0.0447	0.0004	0.0142	0.101
action344	-0.2436	-0.0447	-0.0085	0.0196	0.1011
action345	-0.2436	-0.1363	0.0641	-0.0288	0.1057
action346	-0.2436	-0.1363	-0.056	-0.0234	0.1057
action347	-0.2436	-0.1363	0.0004	-0.0234	0.1057
action348	-0.2436	-0.1363	-0.0085	-0.0288	0.1057
action349	-0.2436	-0.2265	0.0641	-0.0509	0.1081
action350	-0.2436	-0.2265	-0.056	-0.0509	0.1081
action351	-0.2436	-0.2265	0.0004	-0.0509	0.1081
action352	-0.2436	-0.2265	-0.0085	-0.0453	0.1081
action353	-0.2436	-0.3156	0.0641	-0.0744	0.1089
action354	-0.2436	-0.3156	-0.056	-0.0744	0.1089
action355	-0.2436	-0.3156	0.0004	-0.0744	0.1089
action356	-0.2436	-0.3156	-0.0085	-0.0683	0.1089
action357	-0.2436	-0.4048	0.0641	-0.1141	0.1091
action358	-0.2436	-0.4048	-0.056	-0.1141	0.1091
action359	-0.2436	-0.4048	0.0004	-0.1141	0.1091
action360	-0.2436	-0.4048	-0.0085	-0.1141	0.1091
action361	-0.3192	0.3965	0.0641	-0.3023	-0.3505
action362	-0.3192	0.3965	-0.056	-0.3023	-0.3505
action363	-0.3192	0.3965	0.0004	-0.3023	-0.3505
action364	-0.3192	0.3965	-0.0085	-0.3023	-0.3505
action365	-0.3192	0.3169	0.0641	0.0304	-0.2058
action366	-0.3192	0.3169	-0.056	0.0358	-0.2038
action367	-0.3192	0.3169	0.0004	0.0358	-0.2038
action368	-0.3192	0.3169	-0.0085	0.0413	-0.2087
action369	-0.3192	0.2285	0.0641	0.0991	-0.037
action370	-0.3192	0.2285	-0.056	0.0929	-0.0356
action371	-0.3192	0.2285	0.0004	0.0929	-0.0356
action372	-0.3192	0.2285	-0.0085	0.1186	-0.0348
action373	-0.3192	0.1387	0.0641	0.075	0.0526
action374	-0.3192	0.1387	-0.056	0.075	0.0532
action375	-0.3192	0.1387	0.0004	0.075	0.0532
action376	-0.3192	0.1387	-0.0085	0.075	0.0533
action377	-0.3192	0.0474	0.0641	0.0579	0.0867
action378	-0.3192	0.0474	-0.056	0.0523	0.0869
action379	-0.3192	0.0474	0.0004	0.0523	0.0869
action380	-0.3192	0.0474	-0.0085	0.0579	0.0869
action381	-0.3192	-0.0447	0.0641	0.0089	0.101
action382	-0.3192	-0.0447	-0.056	0.0089	0.101
action383	-0.3192	-0.0447	0.0004	0.0089	0.101
action384	-0.3192	-0.0447	-0.0085	0.0196	0.1011
action385	-0.3192	-0.1363	0.0641	-0.0288	0.1057
action386	-0.3192	-0.1363	-0.056	-0.0288	0.1057
action387	-0.3192	-0.1363	0.0004	-0.0288	0.1057
action388	-0.3192	-0.1363	-0.0085	-0.0288	0.1057
action389	-0.3192	-0.2265	0.0641	-0.0509	0.1081
action390	-0.3192	-0.2265	-0.056	-0.0509	0.1081
action391	-0.3192	-0.2265	0.0004	-0.0509	0.1081
action392	-0.3192	-0.2265	-0.0085	-0.0509	0.1081
action393	-0.3192	-0.3156	0.0641	-0.087	0.1089
action394	-0.3192	-0.3156	-0.056	-0.0806	0.1089
action395	-0.3192	-0.3156	0.0004	-0.0806	0.1089
action396	-0.3192	-0.3156	-0.0085	-0.0683	0.1089
action397	-0.3192	-0.4048	0.0641	-0.1141	0.1091
action398	-0.3192	-0.4048	-0.056	-0.1141	0.1091
action399	-0.3192	-0.4048	0.0004	-0.1141	0.1091
action400	-0.3192	-0.4048	-0.0085	-0.1141	0.1091
Multicriteria flows	Phi	Phi+	Phi-
action9	0.1919	0.2103	0.0184
action11	0.1792	0.1996	0.0204
action12	0.1734	0.1948	0.0214
action10	0.1679	0.1975	0.0296
action49	0.1554	0.174	0.0186
action52	0.1503	0.1721	0.0217
action13	0.1486	0.1581	0.0096
action5	0.1447	0.2064	0.0617
action51	0.1426	0.1633	0.0207
action16	0.1372	0.1497	0.0125
action89	0.1358	0.1555	0.0197
action15	0.1343	0.146	0.0117
action7	0.132	0.1957	0.0638
action50	0.1314	0.1612	0.0298
action53	0.1304	0.1405	0.01
action17	0.1246	0.139	0.0144
action14	0.123	0.1439	0.0208
action8	0.1221	0.1873	0.0652
action91	0.1212	0.143	0.0218
action92	0.121	0.1439	0.0229
action6	0.1207	0.1936	0.0729
action55	0.1177	0.1298	0.0121
action129	0.1147	0.1373	0.0226
action56	0.1144	0.1276	0.0131
action19	0.1118	0.1283	0.0165
action20	0.11	0.1275	0.0175
action90	0.1099	0.1408	0.0309
action93	0.1077	0.1196	0.0119
action57	0.1069	0.122	0.015
action45	0.1067	0.1649	0.0582
action54	0.1064	0.1276	0.0212
action131	0.1055	0.1301	0.0246
action132	0.1055	0.131	0.0255
action48	0.1034	0.1653	0.0618
action18	0.1005	0.1261	0.0256
action21	0.0995	0.1243	0.0248
action96	0.0986	0.1131	0.0145
action95	0.0976	0.1113	0.0137
action130	0.0942	0.1279	0.0337
action59	0.0942	0.1113	0.0171
action47	0.094	0.1543	0.0603
action133	0.0938	0.1084	0.0147
action169	0.0931	0.1202	0.0271
action60	0.0924	0.1105	0.0181
action97	0.089	0.1059	0.0169
action85	0.0873	0.1445	0.0572
action94	0.0863	0.1092	0.0229
action23	0.0856	0.1128	0.0271
action24	0.0838	0.1119	0.0281
action172	0.0833	0.1135	0.0302
action58	0.0829	0.1091	0.0262
action46	0.0827	0.1521	0.0694
action135	0.081	0.0978	0.0167
action171	0.0803	0.1095	0.0293
action209	0.0798	0.1135	0.0337
action136	0.0792	0.0969	0.0177
action61	0.0789	0.1056	0.0268
action173	0.0788	0.0983	0.0195
action99	0.0774	0.0962	0.0187
action100	0.0768	0.0963	0.0195
action137	0.0751	0.0947	0.0196
action22	0.0743	0.1106	0.0363
action87	0.0733	0.1324	0.0591
action25	0.0713	0.1118	0.0405
action134	0.0697	0.0956	0.0259
action170	0.069	0.1074	0.0384
action211	0.0669	0.1028	0.0359
action249	0.0666	0.1089	0.0424
action98	0.0661	0.094	0.0279
action63	0.0661	0.095	0.0289
action175	0.0661	0.0876	0.0215
action125	0.0657	0.1234	0.0577
action64	0.0654	0.0949	0.0294
action212	0.0653	0.102	0.0367
action176	0.0643	0.0868	0.0225
action213	0.064	0.0904	0.0264
action139	0.0623	0.0841	0.0217
action101	0.0623	0.0913	0.0289
action86	0.062	0.1303	0.0682
action88	0.0616	0.1229	0.0613
action140	0.0605	0.0832	0.0227
action177	0.0603	0.0848	0.0245
action27	0.0585	0.1011	0.0426
action28	0.0567	0.1003	0.0436
action210	0.0556	0.1006	0.045
action65	0.0551	0.0965	0.0414
action62	0.0548	0.0928	0.038
action174	0.0548	0.0854	0.0307
action127	0.0521	0.1127	0.0606
action215	0.0512	0.0797	0.0285
action138	0.0511	0.0819	0.0308
action216	0.0508	0.08	0.0293
action29	0.0505	0.1068	0.0564
action103	0.0496	0.0806	0.031
action253	0.0492	0.0847	0.0355
action104	0.0489	0.0804	0.0315
action289	0.0484	0.1018	0.0533
action141	0.0484	0.0801	0.0317
action165	0.0476	0.1095	0.0619
action179	0.0475	0.0741	0.0266
action128	0.0475	0.1097	0.0622
action252	0.0474	0.0929	0.0456
action26	0.0472	0.099	0.0517
action217	0.0467	0.078	0.0313
action180	0.0457	0.0733	0.0276
action251	0.0446	0.0895	0.045
action67	0.0423	0.0858	0.0435
action126	0.0408	0.1105	0.0698
action214	0.0399	0.0775	0.0376
action167	0.0397	0.1028	0.0631
action105	0.0385	0.0825	0.0439
action68	0.0384	0.0841	0.0457
action102	0.0383	0.0784	0.0401
action31	0.0377	0.0962	0.0584
action256	0.0372	0.0754	0.0382
action255	0.0363	0.074	0.0376
action178	0.0362	0.072	0.0357
action168	0.0361	0.1008	0.0648
action32	0.0359	0.0953	0.0594
action143	0.0357	0.0695	0.0338
action293	0.0353	0.0819	0.0466
action181	0.0348	0.0711	0.0363
action292	0.034	0.0903	0.0563
action219	0.034	0.0673	0.0334
action144	0.0339	0.0686	0.0347
action205	0.0335	0.101	0.0675
action250	0.0333	0.0874	0.0541
action257	0.0331	0.0734	0.0403
action220	0.0322	0.0665	0.0344
action291	0.0311	0.0869	0.0558
action66	0.031	0.0837	0.0526
action69	0.0288	0.0899	0.0611
action166	0.0284	0.1006	0.0722
action329	0.0284	0.095	0.0666
action30	0.0264	0.094	0.0676
action254	0.0251	0.0718	0.0467
action107	0.0247	0.0714	0.0466
action142	0.0244	0.0673	0.0429
action33	0.024	0.1024	0.0784
action208	0.0232	0.0932	0.07
action218	0.0227	0.0652	0.0425
action145	0.0225	0.0705	0.048
action183	0.022	0.0605	0.0384
action108	0.0218	0.0701	0.0483
action295	0.0213	0.0702	0.0489
action221	0.0212	0.0643	0.0431
action207	0.0207	0.0903	0.0696
action259	0.0203	0.0627	0.0424
action184	0.0203	0.0596	0.0394
action245	0.0202	0.0956	0.0754
action290	0.0198	0.0847	0.0649
action296	0.0196	0.0694	0.0498
action333	0.0185	0.0786	0.06
action260	0.0185	0.0619	0.0433
action297	0.018	0.0697	0.0517
action71	0.016	0.0792	0.0631
action72	0.0154	0.0787	0.0633
action109	0.0144	0.0768	0.0623
action1	0.0138	0.156	0.1422
action106	0.0134	0.0692	0.0558
action332	0.0116	0.0811	0.0695
action182	0.0108	0.0583	0.0475
action35	0.0101	0.0915	0.0814
action294	0.01	0.068	0.058
action147	0.0097	0.0598	0.0501
action206	0.0095	0.0882	0.0787
action258	0.009	0.0605	0.0515
action185	0.0088	0.0615	0.0527
action223	0.0085	0.0537	0.0452
action36	0.0083	0.0907	0.0824
action148	0.0079	0.059	0.0511
action331	0.0078	0.0773	0.0694
action73	0.0077	0.0874	0.0796
action248	0.0077	0.0858	0.0781
action261	0.0076	0.0597	0.0521
action247	0.0072	0.0849	0.0777
action369	0.0071	0.0888	0.0817
action224	0.0067	0.0529	0.0462
action285	0.0062	0.0914	0.0853
action335	0.0058	0.0679	0.0621
action299	0.0053	0.059	0.0537
action37	0.005	0.1017	0.0967
action70	0.0048	0.077	0.0723
action336	0.0041	0.0672	0.063
action337	0.0036	0.0684	0.0648
action300	0.0035	0.0582	0.0547
action373	0.0023	0.0773	0.075
action111	0.0017	0.0661	0.0644
action3	0.001	0.1453	0.1443
action149	0.0005	0.0656	0.0651
action112	-0.0001	0.0653	0.0654
action41	-0.0002	0.1412	0.1413
action4	-0.0008	0.1445	0.1453
action34	-0.0012	0.0893	0.0905
action146	-0.0016	0.0577	0.0592
action222	-0.0028	0.0515	0.0543
action372	-0.0031	0.0809	0.084
action330	-0.0035	0.0751	0.0786
action187	-0.0039	0.0508	0.0547
action246	-0.0041	0.0828	0.0868
action225	-0.0047	0.0547	0.0595
action75	-0.005	0.0767	0.0817
action263	-0.0052	0.049	0.0542
action334	-0.0055	0.0658	0.0713
action188	-0.0057	0.05	0.0557
action287	-0.0058	0.0815	0.0873
action298	-0.006	0.0569	0.0629
action371	-0.0066	0.0771	0.0837
action113	-0.0067	0.0743	0.0809
action288	-0.0068	0.0815	0.0883
action76	-0.0068	0.0759	0.0827
action264	-0.007	0.0482	0.0552
action301	-0.0074	0.0563	0.0637
action39	-0.0077	0.091	0.0987
action325	-0.009	0.0888	0.0978
action339	-0.0091	0.0577	0.0668
action40	-0.0095	0.0902	0.0997
action110	-0.0096	0.0639	0.0736
action77	-0.0101	0.0869	0.097
action2	-0.0103	0.1431	0.1534
action375	-0.0104	0.0667	0.077
action340	-0.012	0.0561	0.0681
action376	-0.0121	0.0659	0.078
action151	-0.0122	0.055	0.0672
action377	-0.0126	0.0672	0.0798
action43	-0.0129	0.1305	0.1434
action189	-0.0131	0.0566	0.0698
action81	-0.0132	0.1281	0.1413
action152	-0.014	0.0541	0.0682
action44	-0.0147	0.1297	0.1444
action186	-0.0152	0.0487	0.0639
action74	-0.0163	0.0745	0.0909
action262	-0.0165	0.0469	0.0633
action286	-0.0171	0.0793	0.0965
action227	-0.0175	0.044	0.0615
action370	-0.0179	0.075	0.0928
action265	-0.0184	0.0501	0.0685
action327	-0.0185	0.0803	0.0989
action328	-0.0186	0.0811	0.0997
action38	-0.019	0.0889	0.1079
action228	-0.0193	0.0432	0.0625
action115	-0.0194	0.0636	0.083
action303	-0.0202	0.0456	0.0658
action338	-0.0204	0.0556	0.076
action153	-0.0206	0.0631	0.0837
action304	-0.0209	0.0454	0.0663
action116	-0.0212	0.0628	0.084
action374	-0.0217	0.0645	0.0862
action341	-0.0218	0.055	0.0768
action365	-0.0227	0.0886	0.1113
action79	-0.0228	0.0762	0.0991
action150	-0.0235	0.0528	0.0763
action42	-0.0242	0.1283	0.1525
action80	-0.0246	0.0754	0.1
action121	-0.0259	0.117	0.1428
action191	-0.0259	0.046	0.0719
action83	-0.0259	0.1174	0.1433
action379	-0.0264	0.0557	0.0822
action229	-0.0267	0.0499	0.0766
action117	-0.0269	0.0734	0.1002
action380	-0.0271	0.0557	0.0829
action192	-0.0277	0.0452	0.0728
action84	-0.0277	0.1166	0.1443
action226	-0.0288	0.0419	0.0707
action326	-0.0298	0.0782	0.108
action114	-0.0307	0.0614	0.0921
action267	-0.0311	0.0394	0.0705
action302	-0.0314	0.0435	0.0749
action155	-0.0333	0.0525	0.0858
action305	-0.0334	0.0469	0.0803
action367	-0.034	0.0787	0.1126
action268	-0.034	0.0382	0.0722
action78	-0.0341	0.0741	0.1082
action193	-0.0342	0.0542	0.0884
action343	-0.0345	0.0444	0.0789
action156	-0.0351	0.0517	0.0867
action344	-0.0352	0.0442	0.0794
action368	-0.0357	0.0785	0.1142
action190	-0.0372	0.0438	0.081
action82	-0.0372	0.1153	0.1525
action378	-0.0377	0.0536	0.0913
action381	-0.038	0.0541	0.0921
action161	-0.0382	0.108	0.1461
action123	-0.0386	0.1063	0.1449
action231	-0.0395	0.0392	0.0786
action119	-0.0396	0.0627	0.1023
action269	-0.0404	0.0452	0.0856
action124	-0.0404	0.1055	0.1459
action232	-0.0412	0.0384	0.0796
action120	-0.0414	0.0619	0.1033
action266	-0.0424	0.0372	0.0797
action157	-0.0446	0.0617	0.1063
action154	-0.0446	0.0503	0.0949
action307	-0.045	0.0366	0.0817
action366	-0.0453	0.0765	0.1218
action342	-0.0458	0.0422	0.088
action195	-0.0469	0.0435	0.0904
action345	-0.0478	0.0456	0.0934
action233	-0.0478	0.0474	0.0951
action308	-0.0479	0.0354	0.0833
action196	-0.0487	0.0427	0.0914
action122	-0.0499	0.1041	0.154
action384	-0.0503	0.0438	0.0942
action201	-0.0504	0.1012	0.1516
action383	-0.0507	0.0435	0.0942
action230	-0.0507	0.037	0.0878
action118	-0.0509	0.0606	0.1114
action163	-0.0509	0.0973	0.1482
action164	-0.0527	0.0965	0.1492
action271	-0.0531	0.0345	0.0876
action272	-0.0549	0.0337	0.0886
action309	-0.0554	0.0421	0.0975
action159	-0.056	0.0512	0.1072
action306	-0.0563	0.0345	0.0908
action160	-0.0565	0.0506	0.1071
action194	-0.0582	0.0413	0.0996
action347	-0.0594	0.0353	0.0947
action197	-0.0596	0.0525	0.1121
action235	-0.0605	0.0367	0.0972
action382	-0.062	0.0413	0.1033
action162	-0.0622	0.0951	0.1573
action348	-0.0623	0.0341	0.0964
action273	-0.0626	0.0425	0.1051
action241	-0.0628	0.0965	0.1594
action385	-0.0629	0.0453	0.1082
action203	-0.0631	0.0905	0.1536
action236	-0.0635	0.0357	0.0991
action270	-0.0644	0.0324	0.0968
action204	-0.0649	0.0897	0.1546
action311	-0.067	0.0318	0.0988
action158	-0.0673	0.049	0.1163
action312	-0.0688	0.0309	0.0997
action349	-0.0698	0.0409	0.1106
action346	-0.0707	0.0332	0.1039
action234	-0.0718	0.0345	0.1064
action199	-0.0723	0.0419	0.1142
action200	-0.0728	0.0412	0.114
action275	-0.0742	0.032	0.1062
action202	-0.0744	0.0884	0.1628
action237	-0.0745	0.0456	0.1201
action281	-0.0753	0.0938	0.1691
action243	-0.0756	0.0859	0.1614
action387	-0.0756	0.0346	0.1102
action276	-0.0771	0.031	0.1081
action244	-0.0774	0.085	0.1624
action388	-0.0774	0.0338	0.1112
action313	-0.0777	0.0395	0.1172
action310	-0.0783	0.0296	0.1079
action351	-0.0825	0.0302	0.1127
action352	-0.0832	0.0297	0.1128
action198	-0.0836	0.0397	0.1233
action389	-0.0849	0.0405	0.1254
action274	-0.0855	0.0299	0.1153
action240	-0.0863	0.0344	0.1208
action242	-0.0869	0.0837	0.1706
action386	-0.0869	0.0325	0.1194
action283	-0.0881	0.0831	0.1712
action321	-0.0885	0.0925	0.181
action239	-0.0887	0.0348	0.1234
action315	-0.0893	0.029	0.1183
action277	-0.0896	0.0408	0.1303
action284	-0.0899	0.0823	0.1722
action316	-0.091	0.0282	0.1193
action353	-0.0921	0.0382	0.1303
action350	-0.0938	0.028	0.1218
action391	-0.0976	0.0299	0.1275
action282	-0.0994	0.0809	0.1803
action392	-0.0994	0.029	0.1285
action238	-0.1	0.0326	0.1326
action314	-0.1005	0.0269	0.1274
action323	-0.1013	0.0818	0.1831
action361	-0.1023	0.0922	0.1945
action279	-0.1023	0.0301	0.1324
action280	-0.1027	0.0294	0.1321
action324	-0.103	0.081	0.1841
action317	-0.1035	0.038	0.1415
action355	-0.1048	0.0275	0.1324
action356	-0.1054	0.0269	0.1324
action390	-0.1089	0.0277	0.1366
action393	-0.1097	0.0375	0.1472
action322	-0.1125	0.0797	0.1922
action278	-0.1136	0.0279	0.1415
action363	-0.115	0.0815	0.1965
action354	-0.1161	0.0254	0.1415
action319	-0.1162	0.0273	0.1435
action320	-0.1166	0.0267	0.1433
action364	-0.1168	0.0807	0.1975
action357	-0.1178	0.0367	0.1546
action396	-0.1205	0.0266	0.1472
action395	-0.1212	0.027	0.1482
action362	-0.1263	0.0794	0.2057
action318	-0.1275	0.0252	0.1527
action359	-0.1306	0.026	0.1566
action360	-0.1324	0.0252	0.1576
action394	-0.1325	0.0249	0.1574
action397	-0.133	0.0364	0.1694
action358	-0.1419	0.0239	0.1658
action399	-0.1457	0.0257	0.1714
action400	-0.1475	0.0249	0.1724
action398	-0.157	0.0236	0.1806

[truncated: 3 more sheets: synthetic-gaussian-ranking, real-gaussian, real-gaussian-ranking]
